# Supplementary material for: Pig Domestication and Human-Mediated Dispersal in Western Eurasia Revealed through Ancient DNA and Geometric Morphometrics
Source: PubMed Central journal article supplement — Mol Biol Evol. 2012 Nov 22;30(4):824–32. doi: 10.1093/molbev/mss261 (PMC3603306; doi:10.1093/molbev/mss261), 2012-11-22
Supplement: supp_mss261_Tables_S1-S6-updated.pdf [file supp_mss261_Tables_S1-S6-updated.pdf]

**Table S1.** List of all the ancient specimens from Middle and Near East analysed in the present study. In the AMS indirect dating, upper and lower bounds determined from AMS dating carried out on associated bones from the same stratigraphic layer is reported. The status (wild versus domestic) of some of the specimens was provided following identification based on traditional metrics. Specimens for which status identification was not possible are left blank. Because traditional metrical methods for determining status are not necessarily conclusive (Evin et al. 2013), some of the status calls reported here may be subject to revision.

| ID sample | Ref. ID / Find ID / Context | Site          | Country          | Period (Stratigraphy evidence) | Period (cal BC)          | AMS dating cal BC (*Indirect dating) | Period (AMS dating)  | Period in fig.1   | Element             | Status   | Lab    | ANC1 Haplogroup | ANC 1 | ANC 2 | Cloning | Ext. replication | GMM Lower M2 | GMM Lower M3 | Reference-Source                                     |
|-----------|-----------------------------|---------------|------------------|--------------------------------|--------------------------|--------------------------------------|----------------------|-------------------|---------------------|----------|--------|-----------------|-------|-------|---------|------------------|--------------|--------------|------------------------------------------------------|
| LG005     | MM-CHKH N106                | Chiskho       | Russia (Adygeya) | Chalcolithic                   | 6,000-3,100 BC           |                                      |                      |                   |                     |          | Durham |                 |       |       |         |                  |              |              | Mashkour, M                                          |
| LG006     | MM-CHKH N107                | Chiskho       | Russia (Adygeya) | Chalcolithic                   | 6,000-3,100 BC           |                                      |                      |                   |                     |          | Durham |                 |       |       |         |                  |              |              | Mashkour, M                                          |
| LG007     | MM-MSK05 N99                | Mushki        | Iran             | Neolithic                      | 7th millennium BC?       |                                      |                      |                   |                     |          | Durham |                 |       |       |         |                  |              |              | Mashkour, M                                          |
| LG008     | MM-MSK06 N100               | Mushki        | Iran             | Neolithic                      | 7th millennium BC?       |                                      |                      |                   |                     |          | Durham |                 |       |       |         |                  |              |              | Mashkour, M                                          |
| LG009     | MM-MSK07 N101               | Mushki        | Iran             | Neolithic                      | 7th millennium BC?       |                                      |                      |                   |                     |          | Durham |                 |       |       |         |                  |              |              | Mashkour, M                                          |
| LG010     | MM-GT01 N102                | Gohar Tappeh  | Iran             | Bronze Age                     | -3,000BC                 |                                      |                      |                   |                     |          | Durham |                 |       |       |         |                  |              |              | Mashkour, M                                          |
| LG011     | MM-GT01 N103                | Gohar Tappeh  | Iran             | Bronze Age                     | -3,000 BC                |                                      |                      | Early Bronze Age  |                     |          | Durham | Am1T            |       |       |         |                  |              |              | Mashkour, M                                          |
| LG012     | MM-GT01 N104                | Gohar Tappeh  | Iran             | Bronze Age                     | -3,000BC                 |                                      |                      |                   |                     |          | Durham |                 |       |       |         |                  |              |              | Mashkour, M                                          |
| LG013     | MM-GKH01 N105               | Ghar Khar     | Iran             | Palaeolithic/Epipalaeolithic   | n/a                      |                                      |                      |                   |                     |          | Durham |                 |       |       |         |                  |              |              | Mashkour, M                                          |
| LG014     | JD-QR09 N108                | Qaleh Rostam  | Iran             | Neolithic                      | 7th millennium BC?       |                                      |                      |                   |                     |          | Durham |                 |       |       |         |                  |              |              | Daujat and Mashkour In prep Proceedings of 10th ASWA |
| LG015     | JD-QR10 N109                | Qaleh Rostam  | Iran             | Neolithic                      | 7th millennium BC?       |                                      |                      |                   |                     |          | Durham |                 |       |       |         |                  |              |              | Daujat and Mashkour In prep Proceedings of 10th ASWA |
| LG016     | JD-QR11 N110                | Qaleh Rostam  | Iran             | Neolithic                      | 7th millennium BC?       |                                      |                      |                   |                     |          | Durham |                 |       |       |         |                  |              |              | Daujat and Mashkour In prep Proceedings of 10th ASWA |
| LG017     | JD-QR12 N111                | Qaleh Rostam  | Iran             | Neolithic                      | 7th millennium BC?       |                                      |                      | Neolithic         |                     |          | Durham | Am1T            |       |       |         |                  |              |              | Daujat and Mashkour In prep Proceedings of 10th ASWA |
| LG059     | EEL968                      | Ulucak Höyük  | Turkey           | Late Neolithic                 | -6,000 BC                |                                      |                      |                   | Radius              |          | Durham |                 |       |       |         |                  |              |              | Çakırlar, C. 2008, 2009                              |
| LG060     | EEL969                      | Ulucak Höyük  | Turkey           | Late Neolithic                 | -6,000 BC                |                                      |                      |                   | Mandible with teeth |          | Durham |                 |       |       |         |                  |              |              | Çakırlar, C. 2008, 2009                              |
| LG061     | EMR573                      | Ulucak Höyük  | Turkey           | Late Neolithic                 | -6,000 BC                |                                      |                      |                   | Mandible with teeth |          | Durham |                 |       |       |         |                  |              |              | Çakırlar, C. 2008, 2009                              |
| LG064     | L: 3185 R:19                | Tol e Spid    | Iran             | Chalcolithic                   | 6,000-3,100 BC           |                                      |                      |                   |                     |          | Durham |                 |       |       |         |                  |              |              | Mashkour, M                                          |
| LG065     | L:3178 R:35                 | Tol e Spid    | Iran             | Chalcolithic                   | 6,000-3,100 BC           |                                      |                      |                   |                     |          | Durham |                 |       |       |         |                  |              |              | Mashkour, M                                          |
| LG066     | L:3177 R:10                 | Tol e Spid    | Iran             | Chalcolithic                   | 6,000-3,100 BC           |                                      |                      |                   |                     |          | Durham |                 |       |       |         |                  |              |              | Mashkour, M                                          |
| LG067     | Exc No: 33030               | Qareh Doyub   | Iran             | Historical                     | 5th -7th Century AD      |                                      |                      | Medieval          |                     |          | Durham | Am1T            |       |       |         |                  |              |              | Mashkour, M                                          |
| LG068     | SF No: 45                   | Qelich Qóineq | Iran             | Achemenid                      | 8th -5th Centuries BC    |                                      |                      |                   |                     |          | Durham |                 |       |       |         |                  |              |              | Mashkour, M                                          |
| LG069     | SF No: 166                  | Qelich Qóineq | Iran             | Achemenid                      | 8th -5th Centuries BC    |                                      |                      |                   | Hellenistic-Roman   |          | Durham | Am1T            |       |       |         |                  |              |              | Mashkour, M                                          |
| LG070     | SF No: 166                  | Qelich Qóineq | Iran             | Achemenid                      | 8th -5th Centuries BC    |                                      |                      |                   | Hellenistic-Roman   |          | Durham | Am1T            |       |       |         |                  |              |              | Mashkour, M                                          |
| LG071     | SF No: P136                 | Qelich Qóineq | Iran             | Achemenid                      | 8th -5th Centuries BC    |                                      |                      |                   | Hellenistic-Roman   |          | Durham | Am1T            |       |       |         |                  |              |              | Mashkour, M                                          |
| LG072     | SF No:32                    | Dasht Qaleh   | Iran             | Historical                     | 5th Century AD           |                                      |                      |                   |                     |          | Durham |                 |       |       |         |                  |              |              | Mashkour, M                                          |
| LG073     | SF No: 099                  | Dasht Qaleh   | Iran             | Historical                     | 5th Century AD           |                                      |                      | Medieval          |                     |          | Durham | Am1T            |       |       |         |                  |              |              | Mashkour, M                                          |
| LG074     | CHI_aDNA_19                 | Çayönü        | Turkey           | PPNB                           |                          |                                      |                      |                   |                     |          | Durham |                 |       |       |         |                  |              |              | Ervynck et al. 2001. Paléorient 27, 2:47-73          |
| LG075     | CHI_aDNA_23                 | Çayönü        | Turkey           | PPNB                           |                          |                                      |                      |                   |                     |          | Durham |                 |       |       |         |                  |              |              | Ervynck et al. 2001. Paléorient 27, 2:47-73          |
| LG076     | CHI_aDNA_30                 | Çayönü        | Turkey           | PPNB                           |                          |                                      |                      |                   |                     |          | Durham |                 |       |       |         |                  |              |              | Ervynck et al. 2001. Paléorient 27, 2:47-73          |
| LG077     | CHI_aDNA_09                 | Çayönü        | Turkey           | PPNA/PPNB                      |                          |                                      |                      |                   |                     |          | Durham |                 |       |       |         |                  |              |              | Ervynck et al. 2001. Paléorient 27, 2:47-73          |
| LG078     | CHI_aDNA_25                 | Çayönü        | Turkey           | PPNB                           |                          |                                      |                      |                   |                     |          | Durham |                 |       |       |         |                  |              |              | Ervynck et al. 2001. Paléorient 27, 2:47-73          |
| LG079     | Mun_013                     | Nevalı Çori   | Turkey           | PPNB                           |                          |                                      |                      |                   |                     |          | Durham |                 |       |       |         |                  |              |              | Helmer, Peters et al. 1999 Paléorient 25, 2:27-48    |
| LG080     | Mun_014                     | Nevalı Çori   | Turkey           | PPNB                           |                          |                                      |                      |                   |                     |          | Durham |                 |       |       |         |                  |              |              | Helmer, Peters et al. 1999 Paléorient 25, 2:27-48    |
| LG081     | Mun_017                     | Nevalı Çori   | Turkey           | PPNB                           |                          |                                      |                      |                   |                     |          | Durham |                 |       |       |         |                  |              |              | Helmer, Peters et al. 1999 Paléorient 25, 2:27-48    |
| LG082     | Mun_018                     | Nevalı Çori   | Turkey           | PPNB                           |                          |                                      |                      |                   |                     |          | Durham |                 |       |       |         |                  |              |              | Helmer, Peters et al. 1999 Paléorient 25, 2:27-48    |
| LG083     | Mun_020                     | Nevalı Çori   | Turkey           | PPNB                           |                          |                                      |                      |                   |                     |          | Durham |                 |       |       |         |                  |              |              | Helmer, Peters et al. 1999 Paléorient 25, 2:27-48    |
| LG109     | Mun_022                     | Lidar Höyük   | Turkey           | MBA III/LBA I ?                |                          | 1,291-1,055 BC                       | Late Bronze/Iron Age | Iron Age          |                     | domestic | Durham | A               |       |       |         |                  |              |              | Peters, J                                            |
| LG110     | Mun_023                     | Lidar Höyük   | Turkey           | MBA III/LBA I ?                |                          | 1,370-1,119 BC                       | Late Bronze/Iron Age | Iron Age          |                     | domestic | Durham | A               |       |       |         |                  |              |              | Peters, J                                            |
| LG111     | Mun_024                     | Lidar Höyük   | Turkey           | MBA III/II ? (uncertain)       |                          |                                      |                      | not included      |                     | domestic | Durham | Am1T            |       |       |         |                  | X            |              | Peters, J                                            |
| LG112     | Mun_025                     | Lidar Höyük   | Turkey           | MBA III/LBA I                  |                          |                                      |                      | Late Bronze Age   |                     |          | Durham | Y2              |       |       |         |                  |              |              | Peters, J                                            |
| LG113     | Mun_026                     | Lidar Höyük   | Turkey           | MBA III/LBA I                  |                          |                                      |                      |                   |                     |          | Durham |                 |       |       |         |                  |              |              | Peters, J                                            |
| LG114     | Mun_033                     | Lidar Höyük   | Turkey           | Late Bronze Age                | 1,650-1,200 BC           | 1,296-1,055 BC                       | Late Bronze/Iron Age | Iron Age          |                     |          | Durham | A               |       |       |         |                  |              |              | Peters, J                                            |
| LG115     | Mun_034                     | Lidar Höyük   | Turkey           | Middle Bronze Age III          | 2,000-1,650 BC           |                                      |                      | Middle Bronze Age |                     |          | Durham | Am1T            |       |       |         |                  |              |              | Peters, J                                            |
| LG116     | Mun_009                     | Gürcütepe II  | Turkey           | Aceramic Neolithic             | 9,600-7,000 BC           |                                      |                      |                   |                     |          | Durham |                 |       |       |         |                  |              |              | Peters, J                                            |
| LG117     | Mun_011                     | Gürcütepe II  | Turkey           | Aceramic Neolithic             | 9,600-7,000 BC           |                                      |                      |                   |                     |          | Durham |                 |       |       |         |                  |              |              | Peters, J                                            |
| LG118     | Mun_010                     | Gürcütepe II  | Turkey           | Aceramic Neolithic             | 9,600-7,000 BC           |                                      |                      |                   |                     |          | Durham |                 |       |       |         |                  |              |              | Peters, J                                            |
| LG128     | Mun_001                     | Göbekli Tepe  | Turkey           | 10th millenium BC              | 9,600-7,000 BC           |                                      |                      |                   |                     |          | Durham |                 |       |       |         |                  |              |              | Peters, J                                            |
| LG129     | Mun_002                     | Göbekli Tepe  | Turkey           | 10th millenium BC              | 9,600-7,000 BC           |                                      |                      |                   |                     |          | Durham |                 |       |       |         |                  |              |              | Peters, J                                            |
| LG130     | Mun_003                     | Göbekli Tepe  | Turkey           | 10th millenium BC              | 9,600-7,000 BC           |                                      |                      |                   |                     |          | Durham |                 |       |       |         |                  |              |              | Peters, J                                            |
| LG131     | Mun_004                     | Göbekli Tepe  | Turkey           | 10th millenium BC              | 9,600-7,000 BC           |                                      |                      |                   |                     |          | Durham |                 |       |       |         |                  |              |              | Peters, J                                            |
| LG132     | Mun_005                     | Göbekli Tepe  | Turkey           | 10th millenium BC              | 9,600-7,000 BC           |                                      |                      |                   |                     |          | Durham |                 |       |       |         |                  |              |              | Peters, J                                            |
| LG133     | Mun_006                     | Göbekli Tepe  | Turkey           | 10th millenium BC              | 9,600-7,000 BC           |                                      |                      |                   |                     |          | Durham |                 |       |       |         |                  |              |              | Peters, J                                            |
| LG134     | Mun_007                     | Göbekli Tepe  | Turkey           | 10th millenium BC              | 9,600-7,000 BC           |                                      |                      |                   |                     |          | Durham |                 |       |       |         |                  |              |              | Peters, J                                            |
| LG135     | Mun_008                     | Göbekli Tepe  | Turkey           | 10th millenium BC              | 9,600-7,000 BC           |                                      |                      |                   |                     |          | Durham |                 |       |       |         |                  |              |              | Peters, J                                            |
| LG136     | Mun_015                     | Nevalı Çori   | Turkey           | PPNB                           |                          |                                      |                      |                   |                     |          | Durham |                 |       |       |         |                  |              |              | Helmer, Peters et al. 1999 Paléorient 25, 2:27-48    |
| LG137     | Mun_028                     | Lidar Höyük   | Turkey           | Medieval                       | 5th cent AD-15th cent AD | 897-1,021 AD                         | Medieval             | Medieval          |                     | domestic | Durham | A               |       |       |         |                  |              |              | Peters, J                                            |

| ID sample | Ref. ID / Find ID / Context | Site            | Country | Period (Stratigraphy evidence) | Period (cal BC) | AMS dating cal BC (indirect dating) | Period (AMS dating) | Period in fig.1   | Element | Status | Lab    | ANC1 Haplogroup | ANC 1 | ANC 2 | Cloning | Ext. replication | GMM Lower M2 | GMM Lower M3 | Reference-Source                                          |
|-----------|-----------------------------|-----------------|---------|--------------------------------|-----------------|-------------------------------------|---------------------|-------------------|---------|--------|--------|-----------------|-------|-------|---------|------------------|--------------|--------------|-----------------------------------------------------------|
| LG138     | Mun_039                     | Lidar Höyük     | Turkey  | MBA III/ LBA I                 |                 |                                     |                     |                   |         |        | Durham |                 |       |       |         |                  |              |              | Peters, J                                                 |
| LG139     | Mun_040                     | Lidar Höyük     | Turkey  | MBA II/III                     |                 |                                     |                     |                   |         |        | Durham |                 |       |       |         |                  |              |              | Peters, J                                                 |
| LG140     | Mun_042                     | Sirkeli Höyük   | Turkey  | Iron Age                       |                 |                                     |                     |                   |         |        | Durham |                 |       |       |         |                  |              |              | Peters, J                                                 |
| LG141     | Mun_043                     | Sirkeli Höyük   | Turkey  | Iron Age                       |                 |                                     |                     |                   |         |        | Durham |                 |       |       |         |                  |              |              | Peters, J                                                 |
| LG142     | Mun_044                     | Sirkeli Höyük   | Turkey  | Iron Age                       |                 |                                     |                     |                   |         |        | Durham |                 |       |       |         |                  |              |              | Peters, J                                                 |
| LG216     | MM-KTsiS01                  | Kohne Tepesi    | Iran    | Early Bronze Age               |                 |                                     |                     |                   |         |        | Durham |                 |       |       |         |                  |              |              | Mashkour, M                                               |
| LG217     | MM-KTsiS02                  | Kohne Tepesi    | Iran    | Early Bronze Age               |                 |                                     |                     | Early Bronze Age  |         |        | Durham | Am1T            |       |       |         |                  |              |              | Mashkour, M                                               |
| LG218     | MM-KTsiS03                  | Kohne Tepesi    | Iran    | Early Bronze Age               |                 |                                     |                     |                   |         |        | Durham |                 |       |       |         |                  |              |              | Mashkour, M                                               |
| LG219     | MM-KTsiS04                  | Kohne Tepesi    | Iran    | Early Bronze Age               |                 |                                     |                     | Early Bronze Age  |         |        | Durham | Am1T            |       |       |         |                  |              |              | Mashkour, M                                               |
| LG220     | MM-KTsiS05                  | Kohne Tepesi    | Iran    | Early Bronze Age               |                 |                                     |                     |                   |         |        | Durham |                 |       |       |         |                  |              |              | Mashkour, M                                               |
| LG221     | MM-KTsiS06                  | Kohne Tepesi    | Iran    | Early Bronze Age               |                 |                                     |                     | Early Bronze Age  |         |        | Durham | Am1T            |       |       |         |                  |              |              | Mashkour, M                                               |
| LG222     | MM-KTsiS07                  | Kohne Tepesi    | Iran    | Early Bronze Age               |                 |                                     |                     | Early Bronze Age  |         |        | Durham | Am1T            |       |       |         |                  |              |              | Mashkour, M                                               |
| LG223     | MM-HTS01                    | Haf tav an Tepe | Iran    | Middle & Late Bronze Age       | 1,800-1,200 BC  |                                     |                     | Late Bronze Age   |         |        | Durham | Am1T            |       |       |         |                  |              |              | Mashkour, M                                               |
| LG224     | MM-HTS02                    | Haf tav an Tepe | Iran    | Middle & Late Bronze Age       | 1,800-1,200 BC  |                                     |                     | Late Bronze Age   |         |        | Durham | Am1T            |       |       |         |                  |              |              | Mashkour, M                                               |
| LG225     | MM-HTS03                    | Haf tav an Tepe | Iran    | Middle & Late Bronze Age       | 1,800-1,200 BC  |                                     |                     | Late Bronze Age   |         |        | Durham | Am1T            |       |       |         |                  |              |              | Mashkour, M                                               |
| LG226     | MM-DTS02                    | Doshan Tepe     | Iran    | Iron Age                       |                 |                                     |                     | Iron Age          |         |        | Durham | Am1T            |       |       |         |                  |              |              | Mashkour, M                                               |
| LG227     | MM-DTS01                    | Doshan Tepe     | Iran    | Iron Age                       |                 |                                     |                     | Iron Age          |         |        | Durham | Am1T            |       |       |         |                  |              |              | Mashkour, M                                               |
| LG240     | DNA_1                       | Areni-1         | Armenia | Chalcolithic                   |                 |                                     |                     |                   |         |        | Durham |                 |       |       |         |                  |              |              | Pinhasi, R.                                               |
| LG241     | DNA_4                       | Areni-1         | Armenia | Chalcolithic or Medieval       |                 |                                     |                     | not included      |         |        | Durham | Am1T            |       |       |         |                  |              |              | Pinhasi, R.                                               |
| LG242     | DNA_5                       | Areni-1         | Armenia | Chalcolithic                   |                 |                                     |                     |                   |         |        | Durham |                 |       |       |         |                  |              |              | Pinhasi, R.                                               |
| LG243     | DNA_8                       | Areni-1         | Armenia | Chalcolithic                   |                 |                                     |                     |                   |         |        | Durham |                 |       |       |         |                  |              |              | Pinhasi, R.                                               |
| LG244     | DNA_9                       | Areni-1         | Armenia | Chalcolithic                   |                 |                                     |                     |                   |         |        | Durham |                 |       |       |         |                  |              |              | Pinhasi, R.                                               |
| LG245     | DNA_11                      | Shengavit       | Armenia | Early Bronze Age               |                 |                                     |                     |                   |         |        | Durham |                 |       |       |         |                  |              |              | Pinhasi, R.                                               |
| LG246     | DNA_13                      | Mokhrablur      | Armenia | Early Bronze Age               |                 |                                     |                     |                   |         |        | Durham |                 |       |       |         |                  |              |              | Pinhasi, R.                                               |
| LG247     | DNA_15                      | Tsakaetsi       | Armenia | Medieval                       |                 |                                     |                     | Medieval          |         |        | Durham | A               |       |       |         |                  |              |              | Pinhasi, R.                                               |
| LG248     | DNA_16                      | Sevkar 4        | Armenia | Iron Age                       |                 |                                     |                     | Iron Age          |         |        | Durham | A               |       |       |         |                  |              |              | Pinhasi, R.                                               |
| LG249     | DNA_18                      | Lchashen 2      | Armenia | Middle Bronze Age              |                 |                                     |                     | Middle Bronze Age |         |        | Durham | Am1T            |       |       |         |                  |              |              | Pinhasi, R.                                               |
| LG250     | Mun_027                     | Lidar Höyük     | Turkey  | MBA II/III                     |                 |                                     |                     |                   |         |        | Durham |                 |       |       |         |                  |              |              | Peters, J                                                 |
| LG251     | Mun_029                     | Lidar Höyük     | Turkey  | MBA III                        |                 |                                     |                     | Middle Bronze Age |         |        | Durham | Am1T            |       |       |         |                  | X            |              | Peters, J                                                 |
| LG252     | Mun_036                     | Lidar Höyük     | Turkey  | Iron Age                       |                 |                                     |                     | Iron Age          |         |        | Durham | Y2              |       |       |         |                  |              |              | Peters, J                                                 |
| LG253     | Mun_037                     | Lidar Höyük     | Turkey  | MBA III/III                    |                 |                                     |                     | Middle Bronze Age |         |        | Durham | Y2              |       |       |         |                  |              |              | Peters, J                                                 |
| LG254     | Mun_038                     | Lidar Höyük     | Turkey  | MBA III/III                    |                 |                                     |                     | Middle Bronze Age |         |        | Durham | Y2              |       |       |         |                  |              |              | Peters, J                                                 |
| LG265     | DNA sample 1                | Ganj Dareh      | Iran    | Neolithic                      |                 |                                     |                     |                   |         |        | Durham |                 |       |       |         |                  |              |              | Zeder, M                                                  |
| LG266     | DNA sample 2                | Ganj Dareh      | Iran    | Neolithic                      |                 |                                     |                     |                   |         |        | Durham |                 |       |       |         |                  |              |              | Zeder, M                                                  |
| LG267     | HC94 5E23-2232              | Halan Çemi      | Turkey  | PPNA                           |                 |                                     |                     |                   |         |        | Durham |                 |       |       |         |                  |              |              | Rosenberg et al. 1998. Paléorient 24, 1:25-41             |
| LG268     | HC94 5E14-2211              | Halan Çemi      | Turkey  | PPNA                           |                 |                                     |                     |                   |         |        | Durham |                 |       |       |         |                  |              |              | Rosenberg et al. 1998. Paléorient 24, 1:25-41             |
| LG269     | HC94 5E23-2227              | Halan Çemi      | Turkey  | PPNA                           |                 |                                     |                     |                   |         |        | Durham |                 |       |       |         |                  |              |              | Rosenberg et al. 1998. Paléorient 24, 1:25-41             |
| LG270     | HC94 5E18-2250              | Halan Çemi      | Turkey  | PPNA                           |                 |                                     |                     |                   |         |        | Durham |                 |       |       |         |                  |              |              | Rosenberg et al. 1998. Paléorient 24, 1:25-41             |
| LG271     | HC94 5H75-2039              | Halan Çemi      | Turkey  | PPNA                           |                 |                                     |                     |                   |         |        | Durham |                 |       |       |         |                  |              |              | Rosenberg et al. 1998. Paléorient 24, 1:25-41             |
| LG272     | DNA sample 21, E-3-8        | Umm Qseir       | Syria   | Chalcolithic (post-Neolithic)  |                 |                                     |                     |                   |         |        | Durham |                 |       |       |         |                  |              |              | Zeder 1994. Amer. Anth., New Ser., 96, 1:97-126           |
| LG273     | E-1-6                       | Umm Qseir       | Syria   | Chalcolithic (post-Neolithic)  |                 |                                     |                     |                   |         |        | Durham |                 |       |       |         |                  |              |              | Zeder 1994. Amer. Anth., New Ser., 96, 1:97-126           |
| LG274     | E-1-4                       | Umm Qseir       | Syria   | Chalcolithic (post-Neolithic)  |                 |                                     |                     |                   |         |        | Durham |                 |       |       |         |                  |              |              | Zeder 1994. Amer. Anth., New Ser., 96, 1:97-126           |
| LG275     | DNA sample 5, B14           | Malyan          | Iran    | Bronze Age/iron Age            |                 |                                     |                     |                   |         |        | Durham |                 |       |       |         |                  |              |              | Miller, Zeder and Arter 2009 (Curr. Anthr. 50, 6:915-924) |
| LG276     | DNA sample 6, OP. B. Lot 12 | Malyan          | Iran    | Bronze Age/iron Age            |                 |                                     |                     | Iron Age          |         |        | Durham | Am1T            |       |       |         |                  |              |              | Miller, Zeder and Arter 2009 (Curr. Anthr. 50, 6:915-924) |
| LG277     | DNA sample 23, Bag 9        | Atij            | Syria   | Bronze Age                     |                 |                                     |                     |                   |         |        | Durham |                 |       |       |         |                  |              |              | Zeder 1994. Amer. Anth., New Ser., 96, 1:97-126           |
| LG278     | DNA sample 22, Bag 189      | Atij            | Syria   | Bronze Age                     |                 |                                     |                     |                   |         |        | Durham |                 |       |       |         |                  |              |              | Zeder 1994. Amer. Anth., New Ser., 96, 1:97-126           |
| LG279     | DNA sample 24, Bag 381      | Mashnaqua       | Syria   | Bronze Age                     |                 |                                     |                     |                   |         |        | Durham |                 |       |       |         |                  |              |              | Zeder, M                                                  |
| LG280     | DNA sample 25, Bag 353      | Mashnaqua       | Syria   | Bronze Age                     |                 |                                     |                     |                   |         |        | Durham |                 |       |       |         |                  |              |              | Zeder, M                                                  |
| LG281     | DNA sample 2, Bag 959       | Leilan          | Syria   | Early/Middle Bronze Age        |                 |                                     |                     | Early Bronze Age  |         |        | Durham | Am1T            |       |       |         |                  | X            |              | Zeder, M                                                  |
| LG282     | DNA sample 9, Bag 549       | Leilan          | Syria   | Early/Middle Bronze Age        |                 |                                     |                     |                   |         |        | Durham |                 |       |       |         |                  |              |              | Zeder, M                                                  |
| LG283     | DNA sample 5, Bag 814       | Leilan          | Syria   | Early/Middle Bronze Age        |                 |                                     |                     |                   |         |        | Durham |                 |       |       |         |                  |              |              | Zeder, M                                                  |
| LG284     | DNA sample 7, Bag 405       | Leilan          | Syria   | Early/Middle Bronze Age        |                 |                                     |                     |                   |         |        | Durham |                 |       |       |         |                  |              |              | Zeder, M                                                  |
| LG285     | DNA sample 1, Bag 478       | Leilan          | Syria   | Early/Middle Bronze Age        |                 |                                     |                     |                   |         |        | Durham |                 |       |       |         |                  |              |              | Zeder, M                                                  |
| LG286     | DNA sample 3, Bag 1048      | Leilan          | Syria   | Early/Middle Bronze Age        |                 |                                     |                     |                   |         |        | Durham |                 |       |       |         |                  |              |              | Zeder, M                                                  |
| LG287     | DNA sample 10, Bag 350      | Leilan          | Syria   | Early/Middle Bronze Age        |                 |                                     |                     |                   |         |        | Durham |                 |       |       |         |                  |              |              | Zeder, M                                                  |
| LG288     | DNA sample 2, Bag 1051      | Leilan          | Syria   | Early/Middle Bronze Age        |                 |                                     |                     |                   |         |        | Durham |                 |       |       |         |                  |              |              | Zeder, M                                                  |
| LG289     | DNA sample 8, Bag 549       | Leilan          | Syria   | Early/Middle Bronze Age        |                 |                                     |                     | Early Bronze Age  |         |        | Durham | Am1T            |       |       |         |                  | X            | X            | Zeder, M                                                  |
| LG290     | DNA sample 10, Level K      | Guran Tepe      | Iran    | Neolithic                      |                 |                                     |                     |                   |         |        | Durham |                 |       |       |         |                  |              |              | Zeder 1999 (Paléorient vol. 25/2 pp. 11-25)               |

| ID sample | Ref. ID / Find ID / Context | Site             | Country | Period (Stratigraphy evidence) | Period (cal BC) | AMS dating cal BC (indirect dating) | Period (AMS dating) | Period in fig.1 | Element  | Status | Lab    | ANC1 Haplogroup    | ANC 1 | ANC 2 | Cloning | Ext. replication | GMM Lower M2 | GMM Lower M3 | Reference-Source                                                                       |
|-----------|-----------------------------|------------------|---------|--------------------------------|-----------------|-------------------------------------|---------------------|-----------------|----------|--------|--------|--------------------|-------|-------|---------|------------------|--------------|--------------|----------------------------------------------------------------------------------------|
| LG291     | DNA sample 11, Level F      | Guran Tepe       | Iran    | Neolithic                      |                 |                                     |                     |                 |          |        | Durham |                    |       |       |         |                  |              |              | Zeder 1999 (Paléorient vol. 25/2 pp. 11-25)                                            |
| LG350     | PIN 23259 Bag18             | Gordion          | Turkey  | Late Hellenistic               |                 |                                     |                     | Hellenistic     |          |        | Durham | LDomGerman yAngler |       |       |         |                  | X            | X            | M-M, Voigt and R-C, Henrickson 2000 Anatolian Studies, 50: 37-54                       |
| LG351     | PIN 29955 Bag 22            | Gordion          | Turkey  | Late Bronze Age?               |                 |                                     |                     | Late Bronze Age |          |        | Durham | Am1T               |       |       |         |                  | X            |              | M-M, Voigt and R-C, Henrickson 2000 Anatolian Studies, 50: 37-54                       |
| LG352     | PIN 30618 Bag 220           | Gordion          | Turkey  | Late Bronze Age                |                 |                                     |                     | Late Bronze Age |          |        | Durham | Am1T               |       |       |         |                  | X            |              | M-M, Voigt and R-C, Henrickson 2000 Anatolian Studies, 50: 37-54                       |
| LG353     | PIN 29550 Bag 16            | Gordion          | Turkey  | Late Phrygian                  |                 |                                     |                     | Hellenistic     |          |        | Durham | A                  |       |       |         |                  | X            | X            | M-M, Voigt and R-C, Henrickson 2000 Anatolian Studies, 50: 37-54                       |
| LG354     | PIN 29961 Bag 22            | Gordion          | Turkey  | Late Bronze Age                |                 |                                     |                     | Late Bronze Age |          |        | Durham | Yellow star        |       |       |         |                  |              |              | M-M, Voigt and R-C, Henrickson 2000 Anatolian Studies, 50: 37-54                       |
| LG355     | PIN 28944 Bag 16            | Gordion          | Turkey  | Late Phrygian                  |                 |                                     |                     |                 |          |        | Durham |                    |       |       |         |                  |              |              | M-M, Voigt and R-C, Henrickson 2000 Anatolian Studies, 50: 37-54                       |
| LG356     | PIN 25020 Bag 35            | Gordion          | Turkey  | Late Phrygian                  |                 |                                     |                     |                 |          |        | Durham | Y1                 |       |       |         |                  |              |              | M-M, Voigt and R-C, Henrickson 2000 Anatolian Studies, 50: 37-54                       |
| LG357     | 168-5                       | Shillourokambos  | Cyprus  | PPNB                           |                 |                                     |                     |                 |          |        | Durham |                    |       |       |         |                  |              |              | Vigne, J-D                                                                             |
| LG414     | MF06 TV:E4 PH:LAPvi         | Mehr Ali         | Iran    | Late Chalcolithic              |                 |                                     |                     | Chalcolithic    |          |        | Durham | Am1T               |       |       |         |                  |              |              | Mashkour, M                                                                            |
| LG415     | TV:F10 PH:5                 | Mehr Ali         | Iran    | Late Chalcolithic              |                 |                                     |                     |                 |          |        | Durham |                    |       |       |         |                  |              |              | Mashkour, M                                                                            |
| LG416     | TV:F10 LOC:40-58 PH:6       | Mehr Ali         | Iran    | Late Chalcolithic              |                 |                                     |                     |                 |          |        | Durham |                    |       |       |         |                  |              |              | Mashkour, M                                                                            |
| LG418     | #14                         | Kohneh Tepesi    | Iran    | Early Bronze Age               |                 |                                     |                     |                 |          |        | Durham |                    |       |       |         |                  |              |              | Mashkour, M                                                                            |
| LG419     | #45                         | Kohneh Tepesi    | Iran    | Early Bronze Age               |                 |                                     |                     |                 |          |        | Durham |                    |       |       |         |                  |              |              | Mashkour, M                                                                            |
| LG420     | #377                        | Kohneh Tepesi    | Iran    | Early Bronze Age               |                 |                                     |                     |                 |          |        | Durham |                    |       |       |         |                  |              |              | Mashkour, M                                                                            |
| LG450     | CHI_aDNA_01                 | Çayönü           | Turkey  | PPNA                           |                 |                                     |                     |                 |          |        | Durham |                    |       |       |         |                  |              |              | Ervynck et al. 2001. Paléorient 27, 2:47-73                                            |
| LG451     | CHI_aDNA_04                 | Çayönü           | Turkey  | PPNA                           |                 |                                     |                     |                 |          |        | Durham |                    |       |       |         |                  |              |              | Ervynck et al. 2001. Paléorient 27, 2:47-73                                            |
| LG452     | CHI_aDNA_08                 | Çayönü           | Turkey  | PPNA/PPNB                      |                 |                                     |                     |                 |          |        | Durham |                    |       |       |         |                  |              |              | Ervynck et al. 2001. Paléorient 27, 2:47-73                                            |
| LG454     | CHI_aDNA_16                 | Çayönü           | Turkey  | PPNB                           |                 |                                     |                     |                 |          |        | Durham |                    |       |       |         |                  |              |              | Ervynck et al. 2001. Paléorient 27, 2:47-73                                            |
| LG455     | CHI_aDNA_21                 | Çayönü           | Turkey  | PPNB                           |                 |                                     |                     |                 |          |        | Durham |                    |       |       |         |                  |              |              | Ervynck et al. 2001. Paléorient 27, 2:47-73                                            |
| LG456     | CHI_aDNA_22                 | Çayönü           | Turkey  | PPNB                           |                 |                                     |                     |                 |          |        | Durham |                    |       |       |         |                  |              |              | Ervynck et al. 2001. Paléorient 27, 2:47-73                                            |
| LG458     | CHI_aDNA_29                 | Çayönü           | Turkey  | PPNB                           |                 |                                     |                     |                 |          |        | Durham |                    |       |       |         |                  |              |              | Ervynck et al. 2001. Paléorient 27, 2:47-73                                            |
| LG459     | CHI_aDNA_31                 | Çayönü           | Turkey  | PN                             |                 |                                     |                     | Neolithic       |          |        | Durham | Am1T               |       |       |         |                  |              |              | Ervynck et al. 2001. Paléorient 27, 2:47-73                                            |
| LG460     | CHI_aDNA_32                 | Çayönü           | Turkey  | PN                             |                 |                                     |                     |                 |          |        | Durham |                    |       |       |         |                  |              |              | Ervynck et al. 2001. Paléorient 27, 2:47-73                                            |
| LG475     | EDI-CAM 250-397b            | Çamlıbel Tarlası | Turkey  | Chalcolithic                   | 3,590-3,470 BC  |                                     | Chalcolithic        | Chalcolithic    | domestic |        | Durham | Am1T               |       |       |         |                  |              |              | Bartosiewicz, L                                                                        |
| LG476     | EDI-CAM 273-868             | Çamlıbel Tarlası | Turkey  | Chalcolithic                   | 3,590-3,470 BC  |                                     | Chalcolithic        | Chalcolithic    | domestic |        | Durham | Am1T               |       |       |         |                  |              |              | Bartosiewicz, L                                                                        |
| LG477     | EDI-CAM 778-5155b           | Çamlıbel Tarlası | Turkey  | Chalcolithic                   | 3,590-3,470 BC  |                                     | Chalcolithic        | Chalcolithic    | domestic |        | Durham | Y1                 |       |       |         |                  | X            |              | Bartosiewicz, L                                                                        |
| LG479     | EDI-CAM 891-5779            | Çamlıbel Tarlası | Turkey  | Chalcolithic                   | 3,590-3,470 BC  |                                     | Chalcolithic        | Chalcolithic    | domestic |        | Durham | Y1                 |       |       |         |                  |              | X            | Bartosiewicz, L                                                                        |
| LG480     | EDI-CAM 966-6042            | Çamlıbel Tarlası | Turkey  | Chalcolithic                   | 3,590-3,470 BC  |                                     | Chalcolithic        | Chalcolithic    | domestic |        | Durham | Am1T               |       |       |         |                  | X            | X            | Bartosiewicz, L                                                                        |
| LG485     | EDI-CAM 247-372b            | Çamlıbel Tarlası | Turkey  | Chalcolithic                   | 3,590-3,470 BC  |                                     | Chalcolithic        | Chalcolithic    | domestic |        | Durham | Y1                 |       |       |         |                  | X            |              | Bartosiewicz, L                                                                        |
| LG486     | EDI-CAM 463-4067            | Çamlıbel Tarlası | Turkey  | Chalcolithic                   | 3,590-3,470 BC  |                                     | Chalcolithic        | Chalcolithic    | domestic |        | Durham | Y1                 |       |       |         |                  |              | X            | Bartosiewicz, L                                                                        |
| LG487     | EDI-CAN 906-5291            | Çamlıbel Tarlası | Turkey  | Chalcolithic                   | 3,590-3,470 BC  |                                     | Chalcolithic        |                 | ?        |        | Durham |                    |       |       |         |                  |              |              | Bartosiewicz, L                                                                        |
| LG488     | EDI-CAM 798-5229            | Çamlıbel Tarlası | Turkey  | Chalcolithic                   | 3,590-3,470 BC  |                                     | Chalcolithic        | Chalcolithic    | domestic |        | Durham | Am1T               |       |       |         |                  | X            | X            | Bartosiewicz, L                                                                        |
| LG489     | EDI-CAM 746-4982            | Çamlıbel Tarlası | Turkey  | Chalcolithic                   | 3,590-3,470 BC  |                                     | Chalcolithic        | Chalcolithic    | domestic |        | Durham | Y1                 |       |       |         |                  | X            | X            | Bartosiewicz, L                                                                        |
| LG491     | EDI-CAM 56-252c             | Çamlıbel Tarlası | Turkey  | Chalcolithic                   | 3,590-3,470 BC  |                                     | Chalcolithic        | Chalcolithic    | domestic |        | Durham | Am1T               |       |       |         |                  |              |              | Bartosiewicz, L                                                                        |
| LG492     | EDI-CAM 352-987             | Çamlıbel Tarlası | Turkey  | Chalcolithic                   | 3,590-3,470 BC  |                                     | Chalcolithic        | Chalcolithic    | domestic |        | Durham | Am1T               |       |       |         |                  |              | X            | Bartosiewicz, L                                                                        |
| LG493     | EDI-CAM 925-5377            | Çamlıbel Tarlası | Turkey  | Chalcolithic                   | 3,590-3,470 BC  |                                     | Chalcolithic        | Chalcolithic    | domestic |        | Durham | Am1T               |       |       |         |                  | X            | X            | Bartosiewicz, L                                                                        |
| LG495     | EDI-CAM 858-5569            | Çamlıbel Tarlası | Turkey  | Chalcolithic                   | 3,590-3,470 BC  |                                     | Chalcolithic        | Chalcolithic    | domestic |        | Durham | Am1T               |       |       |         |                  |              | X            | Bartosiewicz, L                                                                        |
| LG496     | EDI-CAN 263-724             | Çamlıbel Tarlası | Turkey  | Chalcolithic                   | 3,590-3,470 BC  |                                     | Chalcolithic        |                 |          |        | Durham |                    |       |       |         |                  |              |              | Bartosiewicz, L                                                                        |
| LG516     | MUN_012                     | Nevalı Çori      | Turkey  | PPNB                           |                 |                                     |                     |                 |          |        | Durham |                    |       |       |         |                  |              |              | Helmer, Peters et al. 1999. Paléorient 25, 2:27-48                                     |
| G517      | MUN_016                     | Nevalı Çori      | Turkey  | PPNB                           |                 |                                     |                     |                 |          |        | Durham |                    |       |       |         |                  |              |              | Helmer, Peters et al. 1999. Paléorient 25, 2:27-48                                     |
| LG518     | MUN_021                     | Nevalı Çori      | Turkey  | PPNB                           |                 |                                     |                     |                 |          |        | Durham |                    |       |       |         |                  |              |              | Helmer, Peters et al. 1999. Paléorient 25, 2:27-48                                     |
| LG520     | MUN_035                     | Sirkeli Höyük    | Turkey  | Iron Age                       |                 |                                     |                     |                 |          |        | Durham |                    |       |       |         |                  |              |              | Peters, J. Personal communication+http://www.sirkeli-project.info/en/site_sirkeli.html |
| LG521     | MUN_041                     | Sirkeli Höyük    | Turkey  | Iron Age                       |                 |                                     |                     |                 |          |        | Durham |                    |       |       |         |                  |              |              | Peters, J. Personal communication+http://www.sirkeli-project.info/en/site_sirkeli.html |
| LG522     | MUN_045                     | Sirkeli Höyük    | Turkey  | Iron Age                       |                 |                                     |                     | Iron Age        |          |        | Durham | Am1T               |       |       |         |                  |              |              | Peters, J. Personal communication+http://www.sirkeli-project.info/en/site_sirkeli.html |
| LG523     | MUN_046                     | Sirkeli Höyük    | Turkey  | Iron Age                       |                 |                                     |                     |                 |          |        | Durham |                    |       |       |         |                  |              |              | Peters, J. Personal communication+http://www.sirkeli-project.info/en/site_sirkeli.html |
| LG524     | MUN_047                     | Sirkeli Höyük    | Turkey  | Iron Age                       |                 |                                     |                     | Iron Age        |          |        | Durham | Am1T               |       |       |         |                  |              |              | Peters, J. Personal communication+http://www.sirkeli-project.info/en/site_sirkeli.html |
| LG526     | MUN_048                     | Sirkeli Höyük    | Turkey  | Iron Age                       |                 |                                     |                     |                 |          |        | Durham |                    |       |       |         |                  |              |              | Peters, J. Personal communication+http://www.sirkeli-project.info/en/site_sirkeli.html |

| ID sample | Ref. ID / Find ID / Context | Site                | Country | Period (Stratigraphy evidence) | Period (cal BC)       | AMS dating cal BC (indirect dating) | Period (AMS dating) | Period in fig.1  | Element        | Status     | Lab    | ANC1 Haplogroup | ANC 1 | ANC 2 | Cloning | Ext. replication | GMM Lower M2 | GMM Lower M3 | Reference-Source                                                                       |
|-----------|-----------------------------|---------------------|---------|--------------------------------|-----------------------|-------------------------------------|---------------------|------------------|----------------|------------|--------|-----------------|-------|-------|---------|------------------|--------------|--------------|----------------------------------------------------------------------------------------|
| LG527     | MUN_049                     | Sirkeli Höyük       | Turkey  | Iron Age                       |                       |                                     |                     | Iron Age         |                |            | Durham | Y1              |       |       |         |                  |              |              | Peters, J. Personal communication+http://www.sirkeli-project.info/en/site_sirkeli.html |
| LG528     | MUN_050                     | Sirkeli Höyük       | Turkey  | Iron Age                       |                       |                                     |                     |                  |                |            | Durham |                 |       |       |         |                  |              |              | Peters, J. Personal communication+http://www.sirkeli-project.info/en/site_sirkeli.html |
| LG529     | MUN_051                     | Sirkeli Höyük       | Turkey  | Iron Age                       |                       |                                     |                     | Iron Age         |                |            | Durham | Am1T            |       |       |         |                  |              |              | Peters, J. Personal communication+http://www.sirkeli-project.info/en/site_sirkeli.html |
| LG531     | MUN_052                     | Hassek Höyük        | Turkey  | Chalcolithic/Bronze            |                       |                                     |                     |                  |                |            | Durham |                 |       |       |         |                  |              |              | Peters, J. Personal communication                                                      |
| LG532     | MUN_053                     | Hassek Höyük        | Turkey  | Chalcolithic/Bronze            |                       |                                     |                     |                  |                |            | Durham |                 |       |       |         |                  |              |              | Peters, J. Personal communication                                                      |
| LG533     | MUN_054                     | Hassek Höyük        | Turkey  | Chalcolithic/Bronze            |                       |                                     |                     |                  |                |            | Durham |                 |       |       |         |                  |              |              | Peters, J. Personal communication                                                      |
| LG534     | MUN_055                     | Hassek Höyük        | Turkey  | Chalcolithic/Bronze            |                       |                                     |                     |                  |                |            | Durham |                 |       |       |         |                  |              |              | Peters, J. Personal communication                                                      |
| LG536     | MUN_056                     | Hassek Höyük        | Turkey  | Chalcolithic/Bronze            |                       |                                     |                     |                  |                |            | Durham |                 |       |       |         |                  |              |              | Peters, J. Personal communication                                                      |
| LG537     | MUN_057                     | Hassek Höyük        | Turkey  | Chalcolithic/Bronze            |                       |                                     |                     |                  |                |            | Durham |                 |       |       |         |                  |              |              | Peters, J. Personal communication                                                      |
| LG538     | MUN_058                     | Hassek Höyük        | Turkey  | Chalcolithic/Bronze            |                       |                                     |                     |                  |                |            | Durham |                 |       |       |         |                  |              |              | Peters, J. Personal communication                                                      |
| LG539     | MUN_059                     | Hassek Höyük        | Turkey  | Chalcolithic/Bronze            |                       |                                     |                     |                  |                |            | Durham |                 |       |       |         |                  |              |              | Peters, J. Personal communication                                                      |
| LG540     | MUN_060                     | Hassek Höyük        | Turkey  | Chalcolithic/Bronze            |                       |                                     |                     |                  |                |            | Durham |                 |       |       |         |                  |              |              | Peters, J. Personal communication                                                      |
| LG773     | Iran-CG-1                   | Chogha Gavaneh      | Iran    | Chalcolithic/Bronze Age        | 4th/3rd millennium BC |                                     |                     | Early Bronze Age |                |            | Durham | Am1T            |       |       |         |                  |              |              | Mashkour, M                                                                            |
| LG775     | KSB-01                      | Kalanen Siran Bijar | Iran    | Chalcolithic                   |                       |                                     |                     |                  |                |            | Durham |                 |       |       |         |                  |              |              | Mashkour, M                                                                            |
| LG776     | L: 5/f:3                    | Cham Quleh          | Iran    | Chalcolithic                   | 4th/3rd millennium BC |                                     |                     |                  |                |            | Durham |                 |       |       |         |                  |              |              | Mashkour, M                                                                            |
| LG777     | L: 5/R:5                    | Cham Quleh          | Iran    | Chalcolithic                   | 4th/3rd millennium BC |                                     |                     |                  |                |            | Durham |                 |       |       |         |                  |              |              | Mashkour, M                                                                            |
| LG779     | KT-01                       | Kohneh Tepesi       | Iran    | Early Bronze Age               |                       |                                     |                     |                  |                |            | Durham |                 |       |       |         |                  |              |              | Mashkour, M                                                                            |
| LG780     | KT-29                       | Kohneh Tepesi       | Iran    | Early Bronze Age               |                       |                                     |                     | Early Bronze Age |                |            | Durham | Am1T            |       |       |         |                  | X            |              | Mashkour, M                                                                            |
| LG781     | KT-32                       | Kohneh Tepesi       | Iran    | Early Bronze Age               |                       |                                     |                     |                  |                |            | Durham |                 |       |       |         |                  |              |              | Mashkour, M                                                                            |
| LG782     | KT-41                       | Kohneh Tepesi       | Iran    | Early Bronze Age               |                       |                                     |                     |                  |                |            | Durham |                 |       |       |         |                  |              |              | Mashkour, M                                                                            |
| LG784     | HV-08                       | Haftavan Tepe       | Iran    | Middle & Late Bronze Age       | 1,800-1,200 BC        |                                     |                     | Late Bronze Age  |                |            | Durham | Am1T            |       |       |         |                  |              | X            | Mashkour, M                                                                            |
| LG785     | HV-09                       | Haftavan Tepe       | Iran    | Middle & Late Bronze Age       | 1,800-1,200 BC        |                                     |                     | Late Bronze Age  |                |            | Durham | Am1T            |       |       |         |                  | X            | X            | Mashkour, M                                                                            |
| LG786     | HV-10                       | Haftavan Tepe       | Iran    | Middle & Late Bronze Age       | 1,800-1,200 BC        |                                     |                     | Late Bronze Age  |                |            | Durham |                 |       |       |         |                  |              |              | Mashkour, M                                                                            |
| LG787     | HV-13                       | Haftavan Tepe       | Iran    | Middle & Late Bronze Age       | 1,800-1,200 BC        |                                     |                     | Late Bronze Age  |                |            | Durham | Am1T            |       |       |         |                  |              |              | Mashkour, M                                                                            |
| LG788     | HV-33                       | Haftavan Tepe       | Iran    | Middle & Late Bronze Age       | 1,800-1,200 BC        |                                     |                     | Late Bronze Age  |                |            | Durham | Am1T            |       |       |         |                  | X            | X            | Mashkour, M                                                                            |
| LG789     | HV-34                       | Haftavan Tepe       | Iran    | Middle & Late Bronze Age       | 1,800-1,200 BC        |                                     |                     | Late Bronze Age  |                |            | Durham | Am1T            |       |       |         |                  |              | X            | Mashkour, M                                                                            |
| LG790     | HV-35                       | Haftavan Tepe       | Iran    | Middle & Late Bronze Age       | 1,800-1,200 BC        |                                     |                     | Late Bronze Age  |                |            | Durham | Am1T            |       |       |         |                  | X            | X            | Mashkour, M                                                                            |
| LG791     | HV-36                       | Haftavan Tepe       | Iran    | Middle & Late Bronze Age       | 1,800-1,200 BC        |                                     |                     | Late Bronze Age  |                |            | Durham | Am1T            |       |       |         |                  |              | X            | Mashkour, M                                                                            |
| LG792     | HV-37                       | Haftavan Tepe       | Iran    | Middle & Late Bronze Age       | 1,800-1,200 BC        |                                     |                     | Late Bronze Age  |                |            | Durham | Am1T            |       |       |         |                  | X            | X            | Mashkour, M                                                                            |
| LG794     | HV-39                       | Haftavan Tepe       | Iran    | Middle & Late Bronze Age       | 1,800-1,200 BC        |                                     |                     | Late Bronze Age  |                |            | Durham | Am1T            |       |       |         |                  |              | X            | Mashkour, M                                                                            |
| LG795     | HV-45                       | Haftavan Tepe       | Iran    | Middle & Late Bronze Age       | 1,800-1,200 BC        |                                     |                     | Late Bronze Age  |                |            | Durham | Am1T            |       |       |         |                  |              | X            | Mashkour, M                                                                            |
| LG796     | HV-46                       | Haftavan Tepe       | Iran    | Middle & Late Bronze Age       | 1,800-1,200 BC        |                                     |                     | Late Bronze Age  |                |            | Durham | Am1T            |       |       |         |                  |              | X            | Mashkour, M                                                                            |
| LG797     | HV-47                       | Haftavan Tepe       | Iran    | Middle & Late Bronze Age       | 1,800-1,200 BC        |                                     |                     | Late Bronze Age  |                |            | Durham |                 |       |       |         |                  |              |              | Mashkour, M                                                                            |
| LG798     | HV-54                       | Haftavan Tepe       | Iran    | Middle & Late Bronze Age       | 1,800-1,200 BC        |                                     |                     | Late Bronze Age  |                |            | Durham | Am1T            |       |       |         |                  |              | X            | Mashkour, M                                                                            |
| LG799     | HV-55                       | Haftavan Tepe       | Iran    | Middle & Late Bronze Age       | 1,800-1,200 BC        |                                     |                     | Late Bronze Age  |                |            | Durham |                 |       |       |         |                  |              |              | Mashkour, M                                                                            |
| BAD1      |                             | Bademağacı          | Turkey  | Early Neolithic I - 8          | 7,000-6,000 BC        | 7,050-6,690 BC*                     | Early Neolithic     |                  | scapula prox F | domestic   | Leuven |                 |       |       |         |                  |              |              | De Cupere, B.                                                                          |
| BAD10     |                             | Bademağacı          | Turkey  | Early Neolithic II - 3         | 7,000-6,000 BC        | 6,460-6,220 BC*                     | Early Neolithic     | Neolithic        | scapula prox F | domestic   | Leuven | Y1              |       |       |         | X                |              |              | De Cupere, B.                                                                          |
| BAD11     |                             | Bademağacı          | Turkey  | Early Neolithic II - 3         | 7,000-6,000 BC        | 6,460-6,220 BC*                     | Early Neolithic     |                  | tibia dist F   | wild       | Leuven |                 |       |       |         |                  |              |              | De Cupere, B.                                                                          |
| BAD12     |                             | Bademağacı          | Turkey  | Early Neolithic II - 3         | 7,000-6,000 BC        | 6,460-6,220 BC*                     | Early Neolithic     |                  | tibia dist F   | domestic   | Leuven |                 |       |       |         |                  |              |              | De Cupere, B.                                                                          |
| BAD13     |                             | Bademağacı          | Turkey  | Early Neolithic II - 3         | 7,000-6,000 BC        | 6,460-6,220 BC*                     | Early Neolithic     |                  | radius prox    | domestic   | Leuven |                 |       |       |         |                  |              |              | De Cupere, B.                                                                          |
| BAD14     |                             | Bademağacı          | Turkey  | Early Bronze Age II            | 3,100-2,000 BC        |                                     |                     |                  | humerus dist F | wild       | Leuven |                 |       |       |         |                  |              |              | De Cupere, B.                                                                          |
| BAD15     |                             | Bademağacı          | Turkey  | Early Bronze Age II            | 3,100-2,000 BC        |                                     |                     | Early Bronze Age | mandible       | domestic   | Leuven | Y2              |       |       |         | X                |              |              | De Cupere, B.                                                                          |
| BAD16     |                             | Bademağacı          | Turkey  | Early Bronze Age II            | 3,100-2,000 BC        |                                     |                     | Early Bronze Age | mandible       | domestic ? | Leuven | Am1T            |       |       |         | X                |              |              | De Cupere, B.                                                                          |
| BAD17     |                             | Bademağacı          | Turkey  | Early Bronze Age II            | 3,100-2,000 BC        |                                     |                     | Early Bronze Age | maxilla        | domestic   | Leuven | Y1              |       |       | X       |                  |              |              | De Cupere, B.                                                                          |
| BAD18     |                             | Bademağacı          | Turkey  | Early Bronze Age II            | 3,100-2,000 BC        |                                     |                     | Early Bronze Age | maxilla        | domestic   | Leuven | Am1T            |       |       |         | X                |              |              | De Cupere, B.                                                                          |
| BAD19     |                             | Bademağacı          | Turkey  | Early Neolithic II - 1         | 7,000-6,000 BC        | 6,230-6,060 BC*                     | Early Neolithic     |                  | mandible       | domestic   | Leuven |                 |       |       |         |                  |              |              | De Cupere, B.                                                                          |
| BAD2      |                             | Bademağacı          | Turkey  | Early Neolithic I - 8          | 7,000-6,000 BC        | 7,050-6,690 BC*                     | Early Neolithic     |                  | scapula prox F | domestic   | Leuven |                 |       |       |         |                  |              |              | De Cupere, B.                                                                          |
| BAD3      |                             | Bademağacı          | Turkey  | Early Neolithic I - 7          | 7,000-6,000 BC        |                                     |                     |                  | calc voll F    | wild       | Leuven |                 |       |       |         |                  |              |              | De Cupere, B.                                                                          |
| BAD30     |                             | Bademağacı          | Turkey  | Early Neolithic II - 2         | 7,000-6,000 BC        |                                     |                     | Neolithic        | mandible       | domestic   | Leuven | Y1              |       |       |         |                  |              |              | De Cupere, B.                                                                          |
| BAD31     |                             | Bademağacı          | Turkey  | Early Neolithic II - 2         | 7,000-6,000 BC        |                                     |                     |                  | mandible       | domestic   | Leuven |                 |       |       |         |                  |              |              | De Cupere, B.                                                                          |
| BAD32     |                             | Bademağacı          | Turkey  | Early Neolithic II - 2         | 7,000-6,000 BC        |                                     |                     | Neolithic        | mandible       | domestic   | Leuven | Y1              |       |       |         |                  |              |              | De Cupere, B.                                                                          |
| BAD33     |                             | Bademağacı          | Turkey  | Early Neolithic II - 2         | 7,000-6,000 BC        |                                     |                     |                  | mandible       | domestic   | Leuven |                 |       |       |         |                  |              |              | De Cupere, B.                                                                          |
| BAD34     |                             | Bademağacı          | Turkey  | Early Neolithic II - 2         | 7,000-6,000 BC        |                                     |                     |                  | mandible       | domestic   | Leuven |                 |       |       |         |                  |              |              | De Cupere, B.                                                                          |
| BAD35     |                             | Bademağacı          | Turkey  | Early Neolithic II - 2         | 7,000-6,000 BC        |                                     |                     |                  | mandible       | domestic   | Leuven |                 |       |       |         |                  |              |              | De Cupere, B.                                                                          |
| BAD36     |                             | Bademağacı          | Turkey  | Early Neolithic II - 2         | 7,000-6,000 BC        |                                     |                     |                  | mandible       | domestic   | Leuven |                 |       |       |         |                  |              |              | De Cupere, B.                                                                          |
| BAD38     |                             | Bademağacı          | Turkey  | Early Neolithic II - 2         | 7,000-6,000 BC        |                                     |                     |                  | maxilla        | domestic   | Leuven |                 |       |       |         |                  |              |              | De Cupere, B.                                                                          |
| BAD39     |                             | Bademağacı          | Turkey  | Early Neolithic II - 2         | 7,000-6,000 BC        |                                     |                     |                  | maxilla        | domestic   | Leuven |                 |       |       |         |                  |              |              | De Cupere, B.                                                                          |
| BAD4      |                             | Bademağacı          | Turkey  | Early Neolithic II - 4A        | 7,000-6,000 BC        | 6,405-6,235 BC*                     | Early Neolithic     | Neolithic        | tibia dist F   | wild       | Leuven | Y1              |       |       |         |                  |              |              | De Cupere, B.                                                                          |
| BAD47     |                             | Bademağacı          | Turkey  | Early Neolithic II - 3A        | 7,000-6,000 BC        |                                     |                     | Neolithic        | mandible       | domestic   | Leuven | Y1              |       |       | X       |                  |              |              | De Cupere, B.                                                                          |
| BAD5      |                             | Bademağacı          | Turkey  | Early Neolithic II - 4A        | 7,000-6,000 BC        | 6,405-6,235 BC*                     | Early Neolithic     | Neolithic        | talus compl    | wild       | Leuven | Y1              |       |       |         | X                |              |              | De Cupere, B.                                                                          |

| ID sample | Ref. ID / Find ID / Context                                                 | Site         | Country | Period (Stratigraphy evidence) | Period (cal BC) | AMS dating cal BC (indirect dating) | Period (AMS dating) | Period in fig.1  | Element         | Status   | Lab    | ANC1 Haplogroup | ANC 1 | ANC 2 | Cloning | Ext. replication | GMM Lower M2 | GMM Lower M3 | Reference-Source                                                                               |
|-----------|-----------------------------------------------------------------------------|--------------|---------|--------------------------------|-----------------|-------------------------------------|---------------------|------------------|-----------------|----------|--------|-----------------|-------|-------|---------|------------------|--------------|--------------|------------------------------------------------------------------------------------------------|
| BAD50     |                                                                             | Bademağacı   | Turkey  | Early Neolithic II - 4         | 7,000-6,000 BC  | 6,420-6,110 BC*                     | Early Neolithic     |                  | maxilla         | domestic | Leuven |                 |       |       |         |                  |              |              | De Cupere, B.                                                                                  |
| BAD52     |                                                                             | Bademağacı   | Turkey  | Early Neolithic II - 4A        | 7,000-6,000 BC  | 6,405-6,235 BC*                     | Early Neolithic     |                  | mandible        | domestic | Leuven | Am1T            |       |       | X       |                  |              |              | De Cupere, B.                                                                                  |
| BAD54     |                                                                             | Bademağacı   | Turkey  | Early Neolithic II - 4A        | 7,000-6,000 BC  | 6,405-6,235 BC*                     | Early Neolithic     |                  | maxilla         | domestic | Leuven | Am1T            |       |       |         |                  |              |              | De Cupere, B.                                                                                  |
| BAD6      |                                                                             | Bademağacı   | Turkey  | Early Neolithic II - 3A        | 7,000-6,000 BC  |                                     |                     |                  | scapula prox F  | domestic | Leuven |                 |       |       |         |                  |              |              | De Cupere, B.                                                                                  |
| BAD60     |                                                                             | Bademağacı   | Turkey  | Early Neolithic II - 4A        | 7,000-6,000 BC  | 6,405-6,235 BC*                     | Early Neolithic     |                  | maxilla         | domestic | Leuven |                 |       |       |         |                  |              |              | De Cupere, B.                                                                                  |
| BAD63     |                                                                             | Bademağacı   | Turkey  | Early Neolithic II - 4B        | 7,000-6,000 BC  |                                     |                     | Neolithic        | mandible        | domestic | Leuven | Y1              |       |       |         |                  |              |              | De Cupere, B.                                                                                  |
| BAD7      |                                                                             | Bademağacı   | Turkey  | Early Neolithic II - 3A        | 7,000-6,000 BC  |                                     |                     |                  | scapula prox F  | domestic | Leuven |                 |       |       |         |                  |              |              | De Cupere, B.                                                                                  |
| BAD73     |                                                                             | Bademağacı   | Turkey  | Early Neolithic I - 6          | 7,000-6,000 BC  |                                     |                     |                  | M2 maxillar     | domestic | Leuven |                 |       |       |         |                  |              |              | De Cupere, B.                                                                                  |
| BAD8      |                                                                             | Bademağacı   | Turkey  | Early Neolithic II - 3A        | 7,000-6,000 BC  |                                     |                     |                  | scapula prox F  | domestic | Leuven |                 |       |       |         |                  |              |              | De Cupere, B.                                                                                  |
| BAD82     |                                                                             | Bademağacı   | Turkey  | Early Bronze Age II            | 3,100-2,000 BC  |                                     |                     |                  | radius prox     | wild     | Leuven |                 |       |       |         |                  |              |              | De Cupere, B.                                                                                  |
| BAD83     |                                                                             | Bademağacı   | Turkey  | Early Bronze Age II            | 3,100-2,000 BC  |                                     |                     | Early Bronze Age | Ph1 compl, F    | domestic | Leuven | Y1              |       |       |         |                  |              |              | De Cupere, B.                                                                                  |
| BAD84     |                                                                             | Bademağacı   | Turkey  | Early Bronze Age II            | 3,100-2,000 BC  |                                     |                     | Early Bronze Age | humerus dist, F | wild     | Leuven | Y1              |       |       |         |                  |              |              | De Cupere, B.                                                                                  |
| BAD85     |                                                                             | Bademağacı   | Turkey  | Early Bronze Age II            | 3,100-2,000 BC  |                                     |                     | Early Bronze Age | mandible        | wild     | Leuven | Y1              |       |       |         |                  |              |              | De Cupere, B.                                                                                  |
| BAD86     |                                                                             | Bademağacı   | Turkey  | Early Bronze Age II            | 3,100-2,000 BC  |                                     |                     | Early Bronze Age | MT III compl, F | wild     | Leuven | Y1              |       |       | X       |                  |              |              | De Cupere, B.                                                                                  |
| BAD87     |                                                                             | Bademağacı   | Turkey  | Early Bronze Age II            | 3,100-2,000 BC  |                                     |                     | Early Bronze Age | MC II compl, F  | wild     | Leuven | Y1              |       |       |         |                  |              |              | De Cupere, B.                                                                                  |
| BAD9      |                                                                             | Bademağacı   | Turkey  | Early Neolithic II - 3A        | 7,000-6,000 BC  |                                     |                     | Neolithic        | radius prox F   | wild     | Leuven | Am1T            |       |       |         |                  |              |              | De Cupere, B.                                                                                  |
| F13       | SA2007 TD 12-9                                                              | Düzen Tepe   | Turkey  | 6th-3rd century BC             | 6th-3rd cent BC |                                     |                     | Hellenistic      | Mandibula       | domestic | Leuven | A               |       |       |         |                  |              |              | De Cupere, B., Van Neer, W., <a href="http://www.sagalassos.be/">http://www.sagalassos.be/</a> |
| F15       | SA2007 TD 12-9                                                              | Düzen Tepe   | Turkey  | 6th-3rd century BC             | 6th-3rd cent BC | 390-180 BC                          |                     | Hellenistic      | Mandibula       | domestic | Leuven | A               |       |       |         |                  |              |              | De Cupere, B., Van Neer, W., <a href="http://www.sagalassos.be/">http://www.sagalassos.be/</a> |
| F20       | SA2007 TD 12-9                                                              | Düzen Tepe   | Turkey  | 6th-3rd century BC             | 6th-3rd cent BC |                                     |                     | Hellenistic      | Tibia           | domestic | Leuven | A               |       |       |         |                  |              |              | De Cupere, B., Van Neer, W., <a href="http://www.sagalassos.be/">http://www.sagalassos.be/</a> |
| F21       | SA2007 TD 12-9                                                              | Düzen Tepe   | Turkey  | 6th-3rd century BC             | 6th-3rd cent BC |                                     |                     | Hellenistic      | Mp              | domestic | Leuven | C               |       |       |         |                  |              |              | De Cupere, B., Van Neer, W., <a href="http://www.sagalassos.be/">http://www.sagalassos.be/</a> |
| M100      | 1981; E 44 d; Abn. 18                                                       | Lidar Höyük  | Turkey  | Iron Age                       | 1,200-600 BC    |                                     |                     | Iron Age         | Radius          | domestic | Leuven | A               |       |       |         |                  |              |              | Peters, J.                                                                                     |
| M101      | 1981; E 44 c; Abn. 18                                                       | Lidar Höyük  | Turkey  | Iron Age                       | 1,200-600 BC    |                                     |                     | Iron Age         | Mc IV           | domestic | Leuven | Am1T            |       |       |         |                  |              |              | Peters, J.                                                                                     |
| M11       | S1 1; Steg 200/40; 4/49                                                     | Gürcütepe II | Turkey  | Aceramic Neolithic             | 9,600-7,000 BC  |                                     |                     |                  | Mandibula       | domestic | Leuven |                 |       |       |         |                  |              |              | Peters, J.                                                                                     |
| M113      | GT Z; 1995; S 1; 1.1; 80/40; 4/49                                           | Göbekli Tepe | Turkey  | 10th millenium BC              | 9,600-7,000 BC  |                                     |                     |                  | Talus           | wild     | Leuven |                 |       |       |         |                  |              |              | Peters, J.                                                                                     |
| M115      | GT Z; 1995; S 2; 1.1; 50/46                                                 | Göbekli Tepe | Turkey  | 10th millenium BC              | 9,600-7,000 BC  |                                     |                     |                  | Scapula         | wild     | Leuven |                 |       |       |         |                  |              |              | Peters, J.                                                                                     |
| M116      | GT W; 1995; 67/40                                                           | Göbekli Tepe | Turkey  | 10th millenium BC              | 9,600-7,000 BC  |                                     |                     |                  | Radius          | wild     | Leuven |                 |       |       |         |                  |              |              | Peters, J.                                                                                     |
| M118      | GT W; S 2; 1.1; 50/40                                                       | Göbekli Tepe | Turkey  | 10th millenium BC              | 9,600-7,000 BC  |                                     |                     |                  | Talus           | wild     | Leuven |                 |       |       |         |                  |              |              | Peters, J.                                                                                     |
| M119      | 1985; BH 32; O 20; 7,00-10,00; 4,30 - 9,80; Niv. 4, 18-3,90; Nordhalfe      | Hassek Höyük | Turkey  | Chalcolithic                   | 6,000-3,100 BC  |                                     |                     |                  | Mc III          | domestic | Leuven |                 |       |       |         |                  |              |              | Peters, J.                                                                                     |
| M120      | 1985; BH 32; O 20; 7,00-10,00; 4,30 - 9,80; Niv. 4, 18-3,90; Nordhalfe      | Hassek Höyük | Turkey  | Chalcolithic                   | 6,000-3,100 BC  |                                     |                     | Chalcolithic     | Radius          | domestic | Leuven | Am1T            |       |       |         |                  |              |              | Peters, J.                                                                                     |
| M121      | 1985; BH 32; O 20; 7,00-10,00; 4,30 - 9,80; Niv. 4, 18-3,90; Nordhalfe      | Hassek Höyük | Turkey  | Chalcolithic                   | 6,000-3,100 BC  |                                     |                     |                  | Radius          | domestic | Leuven |                 |       |       |         |                  |              |              | Peters, J.                                                                                     |
| M122      | 1985; BH 32; O 20; 7,00-10,00; 4,30 - 9,80; Niv. 4, 18-3,90; Nordhalfe      | Hassek Höyük | Turkey  | Chalcolithic                   | 6,000-3,100 BC  |                                     |                     |                  | Scapula         | domestic | Leuven |                 |       |       |         |                  |              |              | Peters, J.                                                                                     |
| M123      | 1984; BH 110; R 21; 5,0-7,0 (S) 0,6-7,0 (N); 0,6-9,4; Niv. 7, 39-6,81       | Hassek Höyük | Turkey  | Chalcolithic                   | 6,000-3,100 BC  |                                     |                     | Chalcolithic     | Ncr             | domestic | Leuven | Am1T            |       |       |         | X                |              |              | Peters, J.                                                                                     |
| M124      | 1984; BH 110; R 21; 5,0-7,0 (S) 0,6-7,0 (N); 0,6-9,4; Niv. 7, 39-6,81       | Hassek Höyük | Turkey  | Chalcolithic                   | 6,000-3,100 BC  |                                     |                     | Chalcolithic     | Ncr             | domestic | Leuven | Y1              |       |       |         | X                |              |              | Peters, J.                                                                                     |
| M125      | 1985; BH 7; P 16; 0,60-9,40; 0,60-9,40; Niv. 6,01                           | Hassek Höyük | Turkey  | Chalcolithic                   | 6,000-3,100 BC  |                                     |                     |                  | Pelvis          | domestic | Leuven |                 |       |       |         |                  |              |              | Peters, J.                                                                                     |
| M126      | 1985; BH 7; P 16; 0,60-9,40; 0,60-9,40; Niv. 6,01                           | Hassek Höyük | Turkey  | Chalcolithic                   | 6,000-3,100 BC  |                                     |                     |                  | Radius          | domestic | Leuven |                 |       |       |         |                  |              |              | Peters, J.                                                                                     |
| M127      | 1985; BH 7; P 16; 0,60-9,40; 0,60-9,40; Niv. 6,01                           | Hassek Höyük | Turkey  | Chalcolithic                   | 6,000-3,100 BC  |                                     |                     |                  | Maxilla         | domestic | Leuven |                 |       |       |         |                  |              |              | Peters, J.                                                                                     |
| M13       | H 1984; Ash pit, BH 191 (cont.); Layer T 20; 360-760/060-500; Niv 0817-0777 | Hassek Höyük | Turkey  | Early Bronze Age               | 3,100-2,000 BC  |                                     |                     |                  | Maxilla         | domestic | Leuven |                 |       |       |         |                  |              |              | Peters, J.                                                                                     |

| ID sample | Ref. ID / Find ID / Context                                                 | Site         | Country | Period (Stratigraphy evidence) | Period (cal BC)          | AMS dating cal BC (indirect dating) | Period (AMS dating)  | Period in fig.1   | Element       | Status        | Lab      | ANC1 Haplogroup | ANC 1 | ANC 2 | Cloning | Ext. replication | GMM Lower M2 | GMM Lower M3 | Reference-Source |
|-----------|-----------------------------------------------------------------------------|--------------|---------|--------------------------------|--------------------------|-------------------------------------|----------------------|-------------------|---------------|---------------|----------|-----------------|-------|-------|---------|------------------|--------------|--------------|------------------|
| M14       | H 1984, Ash pit, BH 191 (cont.), Layer T 20; 360-760/060-500; Niv 0817-0777 | Hassek Höyük | Turkey  | Early Bronze Age               | 3,100-2,000 BC           |                                     |                      |                   | Maxilla       | domestic      | Leuven   |                 |       |       |         |                  |              |              | Peters, J.       |
| M15       | H 1984, Ash pit, BH 191 (cont.), Layer T 20; 360-760/060-500; Niv 0817-0777 | Hassek Höyük | Turkey  | Early Bronze Age               | 3,100-2,000 BC           |                                     |                      |                   | Mandibula     | domestic      | Leuven   |                 |       |       |         |                  |              |              | Peters, J.       |
| M16       | H 1984, Ash pit, BH 191 (cont.), Layer T 20; 360-760/060-500; Niv 0817-0777 | Hassek Höyük | Turkey  | Early Bronze Age               | 3,100-2,000 BC           |                                     |                      |                   | Humerus       | domestic      | Leuven   |                 |       |       |         |                  |              |              | Peters, J.       |
| M17       | H 1984, Ash pit, BH 191 (cont.), Layer T 20; 360-760/060-500; Niv 0817-0777 | Hassek Höyük | Turkey  | Early Bronze Age               | 3,100-2,000 BC           |                                     |                      |                   | Pelvis        | domestic      | Leuven   |                 |       |       |         |                  |              |              | Peters, J.       |
| M18       | H 1984, Ash pit, BH 191 (cont.), Layer T 20; 360-760/060-500; Niv 0817-0777 | Hassek Höyük | Turkey  | Early Bronze Age               | 3,100-2,000 BC           |                                     |                      | Early Bronze Age  | Pelvis        | domestic      | Leuven   | Arm1T           |       |       |         |                  |              |              | Peters, J.       |
| M19       | H 1984, Ash pit, BH 191 (cont.), Layer T 20; 360-760/060-500; Niv 0817-0777 | Hassek Höyük | Turkey  | Early Bronze Age               | 3,100-2,000 BC           |                                     |                      |                   | Mt IV         | domestic      | Leuven   |                 |       |       |         |                  |              |              | Peters, J.       |
| M40       | 1981: R 45 c/d; Abhub 14                                                    | Lidar Höyük  | Turkey  | Hellenistic-Roman              | 600 BC-5th cent AD       |                                     |                      |                   | Hellenistic   | Talus         | domestic | Leuven          | Arm1T |       |         |                  |              |              | Peters, J.       |
| M41       | 1981: R 45 d; Abh. 12                                                       | Lidar Höyük  | Turkey  | Hellenistic-Roman              | 600 BC-5th cent AD       |                                     |                      |                   | Femur (shaft) | domestic      | Leuven   |                 |       |       |         |                  |              |              | Peters, J.       |
| M42       | 1981: H 40 b/c; 4 OR u 2 'ges'                                              | Lidar Höyük  | Turkey  | Hellenistic-Roman              | 600 BC-5th cent AD       |                                     |                      |                   | Hellenistic   | Cranial frgt. | domestic | Leuven          | A     |       |         |                  |              |              | Peters, J.       |
| M43       | 1981: H 40 b/c; 4 OR u 2 'ges'                                              | Lidar Höyük  | Turkey  | Hellenistic-Roman              | 600 BC-5th cent AD       |                                     |                      |                   | Pelvis        | domestic      | Leuven   |                 |       |       |         |                  |              |              | Peters, J.       |
| M44       | 1981: H 40 b/c; 4 OR u 2 'ges'                                              | Lidar Höyük  | Turkey  | Hellenistic-Roman              | 600 BC-5th cent AD       |                                     |                      |                   | Hellenistic   | Mandibula     | domestic | Leuven          | A     |       |         |                  |              |              | Peters, J.       |
| M45       | 1981: H 40 b/c; 4 OR u 2 'ges'                                              | Lidar Höyük  | Turkey  | Hellenistic-Roman              | 600 BC-5th cent AD       |                                     |                      |                   | Hellenistic   | P4, M1 inf.   | domestic | Leuven          | A     |       |         |                  |              |              | Peters, J.       |
| M46       | 1981: R 45 c/d; Abh. 15                                                     | Lidar Höyük  | Turkey  | Hellenistic-Roman              | 600 BC-5th cent AD       |                                     |                      |                   | Hellenistic   | Maxilla       | domestic | Leuven          | Arm1T |       | X       |                  |              |              | Peters, J.       |
| M47       | 1986: S 43 b; Abh. 15                                                       | Lidar Höyük  | Turkey  | Middle Bronze Age II           | 2,000-1,650 BC           |                                     |                      | Middle Bronze Age | Humerus       | domestic      | Leuven   | Arm1T           |       |       |         |                  |              |              | Peters, J.       |
| M48       | 1986: S 44 a/b; Abh. 54-55                                                  | Lidar Höyük  | Turkey  | Middle Bronze Age II           | 2,000-1,650 BC           |                                     |                      | Middle Bronze Age | Femur (shaft) | wild          | Leuven   | Y2              |       |       |         |                  |              |              | Peters, J.       |
| M49       | 1986: QP 50; Abh. 22; ostl. Stegunterfüllung R.c.                           | Lidar Höyük  | Turkey  | Middle Bronze Age II           | 2,000-1,650 BC           |                                     |                      | Middle Bronze Age | Mt III        | domestic      | Leuven   | Arm1T           |       |       |         |                  |              |              | Peters, J.       |
| M5        | N-Wadi, W-Profil, A1                                                        | Gürcütepe II | Turkey  | Aceramic Neolithic             | 9,600-7,000 BC           |                                     |                      |                   | Maxilla       | domestic      | Leuven   |                 |       |       |         |                  |              |              | Peters, J.       |
| M50       | 1986: Q 44 c - R 44 b; 54 K4                                                | Lidar Höyük  | Turkey  | Middle Bronze Age II           | 2,000-1,650 BC           |                                     |                      | Middle Bronze Age | Maxilla       | domestic      | Leuven   | Arm1T           |       |       |         |                  |              |              | Peters, J.       |
| M51       | 1986: R 44 d; Abh. Gr 182                                                   | Lidar Höyük  | Turkey  | Middle Bronze Age II           | 2,000-1,650 BC           | 1,217-1,025 BC                      | Late Bronze/Iron Age | Iron Age          | Mandibula     | domestic      | Leuven   | A               |       |       |         |                  |              |              | Peters, J.       |
| M52       | 1986: R 44 b; Abh. 54 KV                                                    | Lidar Höyük  | Turkey  | Middle Bronze Age II           | 2,000-1,650 BC           |                                     |                      | Middle Bronze Age | Mandibula     | domestic      | Leuven   | A               |       |       |         |                  |              |              | Peters, J.       |
| M53       | 1980: Q 45 b; 8 GS 1; Layer 1                                               | Lidar Höyük  | Turkey  | Medieval                       | 5th cent AD-15th cent AD |                                     |                      | Medieval          | Maxilla       | domestic      | Leuven   | A               |       |       |         |                  |              |              | Peters, J.       |
| M54       | 1980: Q 45 b; 8 GS 1; Layer 1                                               | Lidar Höyük  | Turkey  | Medieval                       | 5th cent AD-15th cent AD |                                     |                      | Medieval          | Maxilla       | domestic      | Leuven   | A               |       |       |         |                  |              |              | Peters, J.       |
| M55       | 1980: Q 45 b; 8 GS 1; Layer 1                                               | Lidar Höyük  | Turkey  | Medieval                       | 5th cent AD-15th cent AD |                                     |                      | Medieval          | Maxilla       | domestic      | Leuven   | A               |       |       |         |                  |              |              | Peters, J.       |
| M56       | 1980: Q 45 b; 8 GS 1; Layer 1                                               | Lidar Höyük  | Turkey  | Medieval                       | 5th cent AD-15th cent AD |                                     |                      | Medieval          | Maxilla       | domestic      | Leuven   | A               |       |       |         |                  |              |              | Peters, J.       |
| M57       | 1980: Q 45 b; 8 GS 1; Layer 1                                               | Lidar Höyük  | Turkey  | Medieval                       | 5th cent AD-15th cent AD |                                     |                      | Medieval          | Scapula       | domestic      | Leuven   | A               |       |       |         |                  |              |              | Peters, J.       |
| M58       | 1980: Q 45 b; 8 GS 1; Layer 1                                               | Lidar Höyük  | Turkey  | Medieval                       | 5th cent AD-15th cent AD |                                     |                      | Medieval          | Radius        | domestic      | Leuven   | A               |       |       |         |                  |              |              | Peters, J.       |
| M59       | 1980: Q 45 b; 8 GS 1; Layer 1                                               | Lidar Höyük  | Turkey  | Medieval                       | 5th cent AD-15th cent AD |                                     |                      | Medieval          | Pelvis        | domestic      | Leuven   | A               |       |       |         |                  |              |              | Peters, J.       |
| M6        | N-Wadi, W-Profil, D4                                                        | Gürcütepe II | Turkey  | Aceramic Neolithic             | 9,600-7,000 BC           |                                     |                      |                   | Radius        | domestic      | Leuven   |                 |       |       |         |                  |              |              | Peters, J.       |
| M60       | 1987: N 50a; Abh. 27 R 7 u. Fb                                              | Lidar Höyük  | Turkey  | Middle Bronze Age              | 2,000-1,650 BC           |                                     |                      |                   | Humerus       | domestic      | Leuven   |                 |       |       |         |                  |              |              | Peters, J.       |
| M61       | 1987: N 50a; Abh. 27 R 7 u. Fb                                              | Lidar Höyük  | Turkey  | Middle Bronze Age III          | 2,000-1,650 BC           |                                     |                      |                   | Tibia         | domestic      | Leuven   |                 |       |       |         |                  |              |              | Peters, J.       |
| M62       | 1987: S 44/45 - R 44/45; Abh. 59                                            | Lidar Höyük  | Turkey  | Middle Bronze Age              | 2,000-1,650 BC           |                                     |                      |                   | Tibia         | domestic      | Leuven   |                 |       |       |         |                  |              |              | Peters, J.       |
| M63       | 1987: S 44/45 - R 44/45; Abh. 59                                            | Lidar Höyük  | Turkey  | Middle Bronze Age III          | 2,000-1,650 BC           |                                     |                      |                   | Mt IV         | domestic      | Leuven   |                 |       |       |         |                  |              |              | Peters, J.       |
| M64       | 1987: S 46 a; Abh. 30 a, BF 4+3                                             | Lidar Höyük  | Turkey  | Middle Bronze Age III          | 2,000-1,650 BC           |                                     |                      | Middle Bronze Age | Atlas         | domestic      | Leuven   | Arm1T           |       |       |         |                  |              |              | Peters, J.       |
| M65       | 1987: MB I/II (Phase)                                                       | Lidar Höyük  | Turkey  | Middle Bronze Age III          | 2,000-1,650 BC           |                                     |                      |                   | Atlas         | domestic      | Leuven   |                 |       |       |         |                  |              |              | Peters, J.       |

| ID sample | Ref. ID / Find ID / Context          | Site         | Country | Period (Stratigraphy evidence) | Period (cal BC) | AMS dating cal BC (indirect dating) | Period (AMS dating)  | Period in fig.1   | Element         | Status   | Lab    | ANC1 Haplogroup   | ANC 1 | ANC 2 | Cloning | Ext. replication | GMM Lower M2 | GMM Lower M3 | Reference-Source                                                                               |
|-----------|--------------------------------------|--------------|---------|--------------------------------|-----------------|-------------------------------------|----------------------|-------------------|-----------------|----------|--------|-------------------|-------|-------|---------|------------------|--------------|--------------|------------------------------------------------------------------------------------------------|
| M66       | 1987: R 45 c; Abh. 56 u R 322        | Lidar Höyük  | Turkey  | Middle Bronze Age III          | 2,000-1,650 BC  |                                     |                      |                   | Radius          | domestic | Leuven |                   |       |       |         |                  |              |              | Peters, J.                                                                                     |
| M67       | 1987: R 45 c; Abh. 56 u R 322        | Lidar Höyük  | Turkey  | Middle Bronze Age III          | 2,000-1,650 BC  |                                     |                      |                   | Mandibula       | domestic | Leuven |                   |       |       |         |                  |              |              | Peters, J.                                                                                     |
| M68       | 1987: P 50 c/d; Abh. 27 R 18         | Lidar Höyük  | Turkey  | Middle Bronze Age III          | 2,000-1,650 BC  |                                     |                      | Middle Bronze Age | Maxilla         | domestic | Leuven | Y2                |       |       |         |                  |              |              | Peters, J.                                                                                     |
| M69       | 1987: P 50 c/d; Abh. 27 R 18         | Lidar Höyük  | Turkey  | Middle Bronze Age              | 2,000-1,650 BC  |                                     |                      |                   | Humerus         | domestic | Leuven |                   |       |       |         |                  |              |              | Peters, J.                                                                                     |
| M7        | S2; 1,3; 260/40; 1/49                | Gürcütepe II | Turkey  | Aceramic Neolithic             | 9,600-7,000 BC  |                                     |                      |                   | Tibia           | domestic | Leuven |                   |       |       |         |                  |              |              | Peters, J.                                                                                     |
| M70       | 1987: S 44/45; Abh. 57-58            | Lidar Höyük  | Turkey  | Middle Bronze Age III          | 2,000-1,650 BC  |                                     |                      |                   | Maxilla         | domestic | Leuven |                   |       |       |         |                  |              |              | Peters, J.                                                                                     |
| M71       | 1987: S 44/45; Abh. 57-58            | Lidar Höyük  | Turkey  | Middle Bronze Age III          | 2,000-1,650 BC  |                                     |                      | Middle Bronze Age | Mandibula       | domestic | Leuven | Arm1T             |       |       |         |                  |              |              | Peters, J.                                                                                     |
| M72       | 1987: S 44/45; Abh. 57-58            | Lidar Höyük  | Turkey  | Middle Bronze Age III          | 2,000-1,650 BC  |                                     |                      |                   | Maxilla         | domestic | Leuven |                   |       |       |         |                  |              |              | Peters, J.                                                                                     |
| M73       | 1987: S 43 d; Abh. 18                | Lidar Höyük  | Turkey  | Middle Bronze Age III          | 2,000-1,650 BC  |                                     |                      | Middle Bronze Age | Maxilla         | domestic | Leuven | Y2                |       |       |         |                  |              |              | Peters, J.                                                                                     |
| M74       | 1987: S 43 d; Abh. 18                | Lidar Höyük  | Turkey  | Middle Bronze Age III          | 2,000-1,650 BC  |                                     |                      | Middle Bronze Age | Talus           | domestic | Leuven | Arm1T             |       |       |         |                  |              |              | Peters, J.                                                                                     |
| M75       | 1986: R 44 b; Abh. 54 e Fr. 2        | Lidar Höyük  | Turkey  | Late Bronze Age                | 1,650-1,200 BC  |                                     |                      | Late Bronze Age   | Humerus         | domestic | Leuven | Y2                |       |       |         |                  |              |              | Peters, J.                                                                                     |
| M76       | 1986: Q 44 d; Abh. 53, 54 - Fr       | Lidar Höyük  | Turkey  | Late Bronze Age                | 1,650-1,200 BC  | 1,120-900 BC                        | Iron Age             | Iron Age          | Humerus         | domestic | Leuven | A                 |       |       |         |                  |              |              | Peters, J.                                                                                     |
| M77       | 1986: Q 44 d; Abh. 53, 54 - Fr       | Lidar Höyük  | Turkey  | Late Bronze Age                | 1,650-1,200 BC  |                                     |                      | Late Bronze Age   | Talus           | domestic | Leuven | Arm1T             |       |       |         |                  |              |              | Peters, J.                                                                                     |
| M78       | 1986: R 44 d; Abh. 54 e Fr 2         | Lidar Höyük  | Turkey  | Late Bronze Age                | 1,650-1,200 BC  | 1,270-1,050 BC                      | Late Bronze/Iron Age | Iron Age          | Tibia           | domestic | Leuven | A                 |       |       |         |                  |              |              | Peters, J.                                                                                     |
| M79       | 1986: R 44 b; Abh. Mal. (?)          | Lidar Höyük  | Turkey  | Late Bronze Age                | 1,650-1,200 BC  |                                     |                      | Late Bronze Age   | Humerus (shaft) | wild     | Leuven | Arm1T             |       |       |         |                  |              |              | Peters, J.                                                                                     |
| M8        | S1; 1,4; 340/40; 6/49                | Gürcütepe II | Turkey  | Aceramic Neolithic             | 9,600-7,000 BC  |                                     |                      |                   | Scapula         | domestic | Leuven |                   |       |       |         |                  |              |              | Peters, J.                                                                                     |
| M80       | 1986: S 44 a; Abh. 54 e              | Lidar Höyük  | Turkey  | Late Bronze Age                | 1,650-1,200 BC  |                                     |                      | Late Bronze Age   | Tibia           | wild     | Leuven | Arm1T             |       |       |         |                  |              |              | Peters, J.                                                                                     |
| M81       | 1986: R 44 d; Abh. 54 e Fr 2         | Lidar Höyük  | Turkey  | Late Bronze Age                | 1,650-1,200 BC  |                                     |                      | Late Bronze Age   | Scapula         | domestic | Leuven | Arm1T             |       |       |         |                  |              |              | Peters, J.                                                                                     |
| M82       | 1986: R 44 d; Abh. 54 e Fr 2 + Gr    | Lidar Höyük  | Turkey  | Late Bronze Age                | 1,650-1,200 BC  | 1,600-1,570/1540-1440               | Late Bronze Age      | Late Bronze Age   | Mandibula       | domestic | Leuven | A                 |       |       |         |                  |              |              | Peters, J.                                                                                     |
| M83       | 1986: Q 44 d; Abh. 53; S.M 315       | Lidar Höyük  | Turkey  | Late Bronze Age                | 1,650-1,200 BC  |                                     |                      | Late Bronze Age   | Scapula         | domestic | Leuven | Arm1T             |       |       |         |                  |              |              | Peters, J.                                                                                     |
| M84       | 1986: Q/R/S 44/45 Schicht 7          | Lidar Höyük  | Turkey  | Late Bronze Age                | 1,650-1,200 BC  |                                     |                      |                   | Mc IV           | domestic | Leuven |                   |       |       |         |                  |              |              | Peters, J.                                                                                     |
| M85       | 1981: G 34 a/F 34 d; Abh. 24 Fr. 1   | Lidar Höyük  | Turkey  | Early Bronze Age               | 3,100-2,000 BC  | 2,835-2,478 BC                      | Early Bronze Age     | Early Bronze Age  | Mandibula       | domestic | Leuven | Arm1T             |       |       |         |                  |              |              | Peters, J.                                                                                     |
| M86       | 1981: F 34 b/c; Abh. 25 R e          | Lidar Höyük  | Turkey  | Early Bronze Age               | 3,100-2,000 BC  |                                     |                      | Early Bronze Age  | Mandibula       | domestic | Leuven | Arm1T             |       |       |         |                  |              |              | Peters, J.                                                                                     |
| M87       | 1981: G 34 a; Abh. 26 nB1            | Lidar Höyük  | Turkey  | Early Bronze Age               | 3,100-2,000 BC  |                                     |                      | Early Bronze Age  | Phalanx 2 H     | domestic | Leuven | Arm1T             |       |       |         |                  |              |              | Peters, J.                                                                                     |
| M88       | 1981: F 34 c/d - G 34 b; Abh. 26 R j | Lidar Höyük  | Turkey  | Early Bronze Age               | 3,100-2,000 BC  |                                     |                      | Early Bronze Age  | Mandibula       | domestic | Leuven | Arm1T             |       |       |         |                  |              |              | Peters, J.                                                                                     |
| M89       | 1981: F 34 c/d - G 34 b; Abh. 26 R j | Lidar Höyük  | Turkey  | Early Bronze Age               | 3,100-2,000 BC  |                                     |                      |                   | Mt IV           | domestic | Leuven |                   |       |       |         |                  |              |              | Peters, J.                                                                                     |
| M9        | S3; 1,1; 110/40;                     | Gürcütepe II | Turkey  | Aceramic Neolithic             | 9,600-7,000 BC  |                                     |                      |                   | Tibia           | domestic | Leuven |                   |       |       |         |                  |              |              | Peters, J.                                                                                     |
| M90       | 1981: G 33 b; Abh. 28 2; Eimer       | Lidar Höyük  | Turkey  | Early Bronze Age               | 3,100-2,000 BC  |                                     |                      | Early Bronze Age  | Mandibula       | domestic | Leuven | Arm1T             |       |       |         |                  |              |              | Peters, J.                                                                                     |
| M91       | 1986: S 48 a; Abh. 15                | Lidar Höyük  | Turkey  | Iron Age                       | 1,200-600 BC    |                                     |                      |                   | Mp              | domestic | Leuven |                   |       |       |         |                  |              |              | Peters, J.                                                                                     |
| M92       | 1986: S 48 a; Abh. 15                | Lidar Höyük  | Turkey  | Iron Age                       | 1,200-600 BC    |                                     |                      |                   | Pelvis          | domestic | Leuven |                   |       |       |         |                  |              |              | Peters, J.                                                                                     |
| M93       | 1986: S 48 a; Abh. 15                | Lidar Höyük  | Turkey  | Iron Age                       | 1,200-600 BC    |                                     |                      | Iron Age          | Mp N            | domestic | Leuven | Arm1T             |       |       |         |                  |              |              | Peters, J.                                                                                     |
| M94       | 1981: E 44 c; Abh. 23                | Lidar Höyük  | Turkey  | Iron Age                       | 1,200-600 BC    |                                     |                      | Iron Age          | Scapula         | domestic | Leuven | Arm1T             |       |       |         |                  |              |              | Peters, J.                                                                                     |
| M95       | 1981: E 44 c; Abh. 23                | Lidar Höyük  | Turkey  | Iron Age                       | 1,200-600 BC    |                                     |                      | Iron Age          | Maxilla         | domestic | Leuven | Arm1T             |       |       |         |                  |              |              | Peters, J.                                                                                     |
| M96       | 1981: E 44 c; Abh. 19                | Lidar Höyük  | Turkey  | Iron Age                       | 1,200-600 BC    |                                     |                      | Iron Age          | Mandibula       | domestic | Leuven | A                 |       |       | X       |                  |              |              | Peters, J.                                                                                     |
| M97       | 1981: E 44 c; Abh. 21                | Lidar Höyük  | Turkey  | Iron Age                       | 1,200-600 BC    |                                     |                      | Iron Age          | Tibia           | domestic | Leuven | A                 |       |       |         |                  |              |              | Peters, J.                                                                                     |
| M98       | 1981: E 44 c; -                      | Lidar Höyük  | Turkey  | Iron Age                       | 1,200-600 BC    |                                     |                      | Iron Age          | Humerus (shaft) | domestic | Leuven | A                 |       |       |         |                  |              |              | Peters, J.                                                                                     |
| M99       | 1981: E 44 d; Abh. 18                | Lidar Höyük  | Turkey  | Iron Age                       | 1,200-600 BC    |                                     |                      | Iron Age          | Scapula         | domestic | Leuven | Y2                |       |       |         |                  |              |              | Peters, J.                                                                                     |
| SA1193    | SA 2003 DA 167                       | Sagalassos   | Turkey  | Early Byzantine                | 450-650 AD      |                                     |                      |                   | Medieval        | domestic | Leuven | A                 |       |       |         |                  |              | X            | De Cupere, B., Van Neer, W., <a href="http://www.sagalassos.be/">http://www.sagalassos.be/</a> |
| SA1203    | SA 2003 AP 208                       | Sagalassos   | Turkey  | Early to Mid Imperial          | 0-300 AD        |                                     |                      |                   | Hellenistic     | domestic | Leuven | A                 |       |       |         | X                |              | X            | De Cupere, B., Van Neer, W., <a href="http://www.sagalassos.be/">http://www.sagalassos.be/</a> |
| SA1227    | SA 2003 LA1 73                       | Sagalassos   | Turkey  | Early Byzantine                | 450-650 AD      |                                     |                      |                   | Medieval        | domestic | Leuven | A                 |       |       |         | X                | X            |              | De Cupere, B., Van Neer, W., <a href="http://www.sagalassos.be/">http://www.sagalassos.be/</a> |
| SA1230    | SA 2003 AP 191                       | Sagalassos   | Turkey  | Early to Mid Imperial          | 0-300 AD        | 160 BC - 60 AD                      |                      |                   | Hellenistic     | domestic | Leuven | A                 |       |       |         | X                |              | X            | De Cupere, B., Van Neer, W., <a href="http://www.sagalassos.be/">http://www.sagalassos.be/</a> |
| SA1301    | SA 2004 AP 45/3                      | Sagalassos   | Turkey  | Late Roman (Imperial)          | 300-450 AD      |                                     |                      |                   | Hellenistic     | domestic | Leuven | A                 |       |       |         |                  |              | X            | De Cupere, B., Van Neer, W., <a href="http://www.sagalassos.be/">http://www.sagalassos.be/</a> |
| SA1302    | SA 2004 AP 45/3                      | Sagalassos   | Turkey  | Late Roman (Imperial)          | 300-450 AD      |                                     |                      |                   | Hellenistic     | domestic | Leuven | A                 |       |       |         |                  |              |              | De Cupere, B., Van Neer, W., <a href="http://www.sagalassos.be/">http://www.sagalassos.be/</a> |
| SA1315    | SA 2004 AP 70/2                      | Sagalassos   | Turkey  | Late Roman (Imperial)          | 300-450 AD      | 250-430 AD                          |                      |                   | Hellenistic     | domestic | Leuven | LDomBritSad die01 |       |       |         |                  |              | X            | De Cupere, B., Van Neer, W., <a href="http://www.sagalassos.be/">http://www.sagalassos.be/</a> |
| SA133     | SA 2000 B3 198                       | Sagalassos   | Turkey  | Early Byzantine                | 450-650 AD      | 230-410 AD                          |                      |                   | Hellenistic     | domestic | Leuven | A                 |       |       |         | X                | X            | X            | De Cupere, B., Van Neer, W., <a href="http://www.sagalassos.be/">http://www.sagalassos.be/</a> |

| ID sample | Ref. ID / Find ID / Context                              | Site                        | Country | Period (Stratigraphy evidence)          | Period (cal BC) | AMS dating cal BC (indirect dating) | Period (AMS dating) | Period in fig.1 | Element               | Status    | Lab    | ANC1 Haplogroup | ANC 1 | ANC 2 | Cloning | Ext. replication | GMM Lower M2 | GMM Lower M3 | Reference-Source                                                                               |
|-----------|----------------------------------------------------------|-----------------------------|---------|-----------------------------------------|-----------------|-------------------------------------|---------------------|-----------------|-----------------------|-----------|--------|-----------------|-------|-------|---------|------------------|--------------|--------------|------------------------------------------------------------------------------------------------|
| SA139     | SA 2001 NEG 113                                          | Sagalassos                  | Turkey  | Early Byzantine                         | 450-650 AD      | 140-390 AD                          |                     | Hellenistic     |                       | domestic  | Leuven | A               |       |       |         |                  | X            | X            | De Cupere, B., Van Neer, W., <a href="http://www.sagalassos.be/">http://www.sagalassos.be/</a> |
| SA223     | SA 2000 B3 278                                           | Sagalassos                  | Turkey  | Early Byzantine                         | 450-650 AD      |                                     |                     | Medieval        |                       | domestic  | Leuven | A               |       |       |         |                  | X            | X            | De Cupere, B., Van Neer, W., <a href="http://www.sagalassos.be/">http://www.sagalassos.be/</a> |
| SA295     | SA 91 N 309                                              | Sagalassos                  | Turkey  | Late Roman (Imperial)                   | 300-450 AD      |                                     |                     | Hellenistic     |                       | domestic  | Leuven | A               |       |       |         | X                |              | X            | De Cupere, B., Van Neer, W., <a href="http://www.sagalassos.be/">http://www.sagalassos.be/</a> |
| SA298     | SA 91 N 309                                              | Sagalassos                  | Turkey  | Late Roman (Imperial)                   | 300-450 AD      |                                     |                     | Hellenistic     |                       | domestic  | Leuven | A               |       |       |         |                  |              |              | De Cupere, B., Van Neer, W., <a href="http://www.sagalassos.be/">http://www.sagalassos.be/</a> |
| SA398     | SA 92 N 389                                              | Sagalassos                  | Turkey  | Late Roman (Imperial)                   | 300-450 AD      | 260-520 AD                          |                     | Hellenistic     |                       | domestic  | Leuven | C               |       |       |         |                  |              |              | De Cupere, B., Van Neer, W., <a href="http://www.sagalassos.be/">http://www.sagalassos.be/</a> |
| SA400     | SA 92 N 389                                              | Sagalassos                  | Turkey  | Late Roman (Imperial)                   | 300-450 AD      |                                     |                     | Hellenistic     |                       | domestic  | Leuven | A               |       |       |         |                  |              | X            | De Cupere, B., Van Neer, W., <a href="http://www.sagalassos.be/">http://www.sagalassos.be/</a> |
| SA405     | SA 90 DT 2                                               | Sagalassos                  | Turkey  | 0-1200 AD                               | 0-1,200 AD      |                                     |                     | Medieval        |                       | domestic  | Leuven | A               |       |       |         |                  | X            | X            | De Cupere, B., Van Neer, W., <a href="http://www.sagalassos.be/">http://www.sagalassos.be/</a> |
| SA406     | SA 90 DT 2                                               | Sagalassos                  | Turkey  | 0-1200 AD                               | 0-1,200 AD      |                                     |                     | Medieval        |                       | domestic  | Leuven | A               |       |       |         |                  |              | X            | De Cupere, B., Van Neer, W., <a href="http://www.sagalassos.be/">http://www.sagalassos.be/</a> |
| SA510     | SA 2000 B1 165                                           | Sagalassos                  | Turkey  | Early Byzantine                         | 450-650 AD      |                                     |                     | Medieval        |                       | domestic  | Leuven | A               |       |       |         |                  |              | X            | De Cupere, B., Van Neer, W., <a href="http://www.sagalassos.be/">http://www.sagalassos.be/</a> |
| SA791     | SA 90 N 4                                                | Sagalassos                  | Turkey  | Late Roman (Imperial)                   | 300-450 AD      |                                     |                     | Hellenistic     |                       | domestic  | Leuven | A               |       |       |         | X                |              |              | De Cupere, B., Van Neer, W., <a href="http://www.sagalassos.be/">http://www.sagalassos.be/</a> |
| SA941     | SA 96 B 262                                              | Sagalassos                  | Turkey  | Early Byzantine                         | 450-650 AD      |                                     |                     | Medieval        |                       | domestic  | Leuven | A               |       |       |         | X                |              | X            | De Cupere, B., Van Neer, W., <a href="http://www.sagalassos.be/">http://www.sagalassos.be/</a> |
| SA988     | SA 95 UAN 216                                            | Sagalassos                  | Turkey  | Early Byzantine                         | 450-650 AD      |                                     |                     | Medieval        |                       | domestic  | Leuven | A               |       |       |         |                  |              | X            | De Cupere, B., Van Neer, W., <a href="http://www.sagalassos.be/">http://www.sagalassos.be/</a> |
| Aru10     | 2006, D07                                                | Aruclho                     | Georgia | Early Neolithic, Sulveri-Somutepe-Group | 5,600-5,300     |                                     |                     | Neolithic       |                       | domestic  | Mainz  | Arm1T           |       |       |         |                  |              |              | Benecke, N.                                                                                    |
| Aru11     | 2006, D08                                                | Aruclho                     | Georgia | Early Neolithic, Sulveri-Somutepe-Group | 5,600-5,300     |                                     |                     | Neolithic       |                       | domestic  | Mainz  | Arm1T           |       |       |         |                  |              |              | Benecke, N.                                                                                    |
| Aru12     | 2006, D12                                                | Aruclho                     | Georgia | Early Neolithic, Sulveri-Somutepe-Group | 5,600-5,300     |                                     |                     | Neolithic       |                       | domestic  | Mainz  | Arm1T           |       |       |         |                  |              |              | Benecke, N.                                                                                    |
| Aru13     | 2006, D38                                                | Aruclho                     | Georgia | Early Neolithic, Sulveri-Somutepe-Group | 5,600-5,300     |                                     |                     | Neolithic       |                       | domestic  | Mainz  | Arm1T           |       |       |         |                  |              |              | Benecke, N.                                                                                    |
| Aru24     | 2005, D30                                                | Aruclho                     | Georgia | Early Neolithic, Sulveri-Somutepe-Group | 5,600-5,300     |                                     |                     | Neolithic       |                       | domestic  | Mainz  | Arm1T           |       |       |         |                  |              |              | Benecke, N.                                                                                    |
| Aru25     | 2005, A 21 D                                             | Aruclho                     | Georgia | Early Neolithic, Sulveri-Somutepe-Group | 5,600-5,300     |                                     |                     | Neolithic       |                       | domestic  | Mainz  | Arm1T           |       |       |         |                  |              |              | Benecke, N.                                                                                    |
| Aru7      | 2006, B14                                                | Aruclho                     | Georgia | Early Neolithic, Sulveri-Somutepe-Group | 5,600-5,300     |                                     |                     | Neolithic       |                       | domestic  | Mainz  | Arm1T           |       |       |         |                  |              |              | Benecke, N.                                                                                    |
| Aru8      | 2006, B21                                                | Aruclho                     | Georgia | Early Neolithic, Sulveri-Somutepe-Group | 5,600-5,300     |                                     |                     |                 |                       | domestic  | Mainz  |                 |       |       |         |                  |              |              | Benecke, N.                                                                                    |
| Aru9      | 2006, C28                                                | Aruclho                     | Georgia | Early Neolithic, Sulveri-Somutepe-Group | 5,600-5,300     |                                     |                     |                 |                       | domestic  | Mainz  |                 |       |       |         |                  |              |              | Benecke, N.                                                                                    |
| Mal12     | 2004, Bef. 69                                            | Malkayasi, Latmos mountains | Turkey  | Chalcolithic                            | 5,000-4,500     | 5189 ± 84 calBC                     | Chalcolithic        | Chalcolithic    |                       | wild      | Mainz  | Y1              |       |       |         |                  |              |              | Benecke, N.                                                                                    |
| Mal4      | 2002, Bef. 127                                           | Malkayasi, Latmos mountains | Turkey  | Chalcolithic                            | 5,000-4,500     |                                     |                     |                 |                       | wild      | Mainz  |                 |       |       |         |                  |              |              | Benecke, N.                                                                                    |
| Mal5      | 2002, Bef. 122                                           | Malkayasi, Latmos mountains | Turkey  | Chalcolithic                            | 5,000-4,500     |                                     |                     |                 |                       | wild      | Mainz  |                 |       |       |         |                  |              |              | Benecke, N.                                                                                    |
| Mal6      | 2004, Bef. 58                                            | Malkayasi, Latmos mountains | Turkey  | Chalcolithic                            | 5,000-4,500     |                                     |                     |                 |                       | wild      | Mainz  |                 |       |       |         |                  |              |              | Benecke, N.                                                                                    |
| Mal7      | 2004, Bef. 48                                            | Malkayasi, Latmos mountains | Turkey  | Chalcolithic                            | 5,000-4,500     |                                     |                     |                 |                       | wild      | Mainz  |                 |       |       |         |                  |              |              | Benecke, N.                                                                                    |
| Mal8      | 2002, Bef. 22                                            | Malkayasi, Latmos mountains | Turkey  | Chalcolithic                            | 5,000-4,500     |                                     |                     |                 |                       | wild      | Mainz  |                 |       |       |         |                  |              |              | Benecke, N.                                                                                    |
| Mal9      | 2002, Bef. 54                                            | Malkayasi, Latmos mountains | Turkey  | Chalcolithic                            | 5,000-4,500     | 4254 ± 61 calBC                     | Chalcolithic        | Chalcolithic    |                       | wild      | Mainz  | Y1              |       |       |         |                  |              |              | Benecke, N.                                                                                    |
| Men 2     | Mentesse 2000, 26/7, OPER 2000, 21, 122, 678 / Probe #17 | Mentesse                    | Turkey  | Neolithic                               | -6,000          |                                     |                     |                 | rechter Metacarpus II | domestic? | Mainz  |                 |       |       |         |                  |              |              | Pinhasi, R.                                                                                    |
| Men 4     | Mentesse 2000, 14/7, OPER 2000, 12, 101, 604 / Probe #10 | Mentesse                    | Turkey  | Neolithic                               | -6,000          |                                     |                     | Neolithic       | linker Metacarpus III | domestic? | Mainz  | Y1              |       |       |         |                  |              |              | Pinhasi, R.                                                                                    |
| Men 5     | Mentesse 2000, 16/7, OPER 2000, 11, 101, 619 / Probe #5  | Mentesse                    | Turkey  | Neolithic                               | -6,000          |                                     |                     | Neolithic       | Rechter Humerus       | domestic? | Mainz  | Y1              |       |       |         |                  |              |              | Pinhasi, R.                                                                                    |
| Tac10     | Ud2005, 025D / Bef. 197                                  | Tachti-Perda                | Georgia | Late Bronze Age                         | 1,400-1,200     |                                     |                     | Late Bronze Age |                       | domestic  | Mainz  | Arm1T           |       |       |         |                  |              |              | Benecke, N.                                                                                    |
| Tac13     | Ud2005, 025D / Bef. 197                                  | Tachti-Perda                | Georgia | Late Bronze Age                         | 1,400-1,200     |                                     |                     | Late Bronze Age |                       | domestic  | Mainz  | Arm1T           |       |       |         |                  |              |              | Benecke, N.                                                                                    |
| Tac14     | Ud2005, 025D / Bef. 197                                  | Tachti-Perda                | Georgia | Late Bronze Age                         | 1,400-1,200     |                                     |                     | Late Bronze Age |                       | domestic  | Mainz  | Arm1T           |       |       |         |                  |              |              | Benecke, N.                                                                                    |
| Tac15     | Ud2005, 025D / Bef. 197                                  | Tachti-Perda                | Georgia | Late Bronze Age                         | 1,400-1,200     |                                     |                     | Late Bronze Age |                       | domestic  | Mainz  | Arm1T           |       |       |         |                  |              |              | Benecke, N.                                                                                    |
| Tac16     | Ud2005, 025D / Bef. 197                                  | Tachti-Perda                | Georgia | Late Bronze Age                         | 1,400-1,200     |                                     |                     | Late Bronze Age |                       | domestic  | Mainz  | Arm1T           |       |       |         |                  |              |              | Benecke, N.                                                                                    |
| Tac17     | Ud2005, 025D / Bef. 197                                  | Tachti-Perda                | Georgia | Late Bronze Age                         | 1,400-1,200     |                                     |                     | Late Bronze Age |                       | domestic  | Mainz  | Arm1T           |       |       |         |                  |              |              | Benecke, N.                                                                                    |
| Tac6      | Ud2005, 025 / Bef. 196                                   | Tachti-Perda                | Georgia | Late Bronze Age                         | 1,400-1,200     |                                     |                     | Late Bronze Age |                       | domestic  | Mainz  | Arm1T           |       |       |         |                  |              |              | Benecke, N.                                                                                    |
| Tac8      | Ta2006, 025B / Bef. 270                                  | Tachti-Perda                | Georgia | Late Bronze Age                         | 1,400-1,200     |                                     |                     | Late Bronze Age |                       | domestic  | Mainz  | Arm1T           |       |       |         |                  |              |              | Benecke, N.                                                                                    |
| Ulu1      | DIE5920                                                  | Ulucak Höyük                | Turkey  | Neolithic                               | 6,400-5,900     |                                     |                     | Neolithic       | Metapodium            | domestic  | Mainz  | Y1              |       |       |         |                  |              |              | Çakırlar, C. 2008, 2009                                                                        |



| ID sample | Ref. ID / Find ID / Context | Site         | Country | Period (Stratigraphy evidence) | Period (cal BC) | AMS dating cal BC (indirect dating) | Period (AMS dating) | Period in fig.1 | Element            | Status   | Lab   | ANC1 Haplogroup | ANC 1 | ANC 2 | Cloning | Ext. replication | GMM Lower M2 | GMM Lower M3 | Reference-Source        |
|-----------|-----------------------------|--------------|---------|--------------------------------|-----------------|-------------------------------------|---------------------|-----------------|--------------------|----------|-------|-----------------|-------|-------|---------|------------------|--------------|--------------|-------------------------|
| Ulu17     | Vd FFO / Fundnr. 3548       | Ulucak Höyük | Turkey  | Neolithic                      | 6,400-5,900     |                                     |                     |                 | Metapodium         | wild?    | Mainz |                 |       |       |         |                  |              |              | Çakırlar, C. 2008, 2009 |
| Ulu2      | IVb DOT                     | Ulucak Höyük | Turkey  | Neolithic                      | 6,400-5,900     |                                     |                     |                 | Mandibula          | domestic | Mainz |                 |       |       |         |                  |              |              | Çakırlar, C. 2008, 2009 |
| Ulu20     | FLI2929                     | Ulucak Höyük | Turkey  | Neolithic                      | 6,400-5,900     |                                     |                     | Neolithic       | Scapula            | domestic | Mainz | Y1              |       |       |         |                  |              |              | Çakırlar, C. 2008, 2009 |
| Ulu21     | Vc EUF / Fundnr. 1595       | Ulucak Höyük | Turkey  | Neolithic                      | 6,400-5,900     |                                     |                     |                 | Maxilla with teeth | wild?    | Mainz |                 |       |       |         |                  |              |              | Çakırlar, C. 2008, 2009 |
| Ulu24     | EUS1209                     | Ulucak Höyük | Turkey  | Neolithic                      | 6,400-5,900     |                                     |                     | Neolithic       | Maxilla with teeth | domestic | Mainz | Y1              |       |       |         |                  |              |              | Çakırlar, C. 2008, 2009 |
| Ulu27     | EHE875                      | Ulucak Höyük | Turkey  | Neolithic                      | 6,400-5,900     |                                     |                     | Neolithic       | Maxilla with teeth | domestic | Mainz | Y1              |       |       |         |                  |              |              | Çakırlar, C. 2008, 2009 |
| Ulu28     | Vb EGN                      | Ulucak Höyük | Turkey  | Neolithic                      | 6,400-5,900     |                                     |                     | Neolithic       | Maxilla with teeth | domestic | Mainz | Y1              |       |       |         |                  |              |              | Çakırlar, C. 2008, 2009 |
| Ulu29     | Vb EEL                      | Ulucak Höyük | Turkey  | Neolithic                      | 6,400-5,900     |                                     |                     |                 | Ulna               | domestic | Mainz |                 |       |       |         |                  |              |              | Çakırlar, C. 2008, 2009 |
| Ulu30     | DBF                         | Ulucak Höyük | Turkey  | Early Bronze Age               |                 |                                     |                     |                 | Maxilla with teeth | domestic | Mainz |                 |       |       |         |                  |              |              | Çakırlar, C. 2008, 2009 |
| Ulu32     | CPI520-4                    | Ulucak Höyük | Turkey  | Early Bronze Age               |                 |                                     |                     |                 | tibia              | wild?    | Mainz |                 |       |       |         |                  |              |              | Çakırlar, C. 2008, 2009 |
| Ulu33     | IVb BOF / Fundnr. 2392      | Ulucak Höyük | Turkey  | Neolithic                      | 6,400-5,900     |                                     |                     |                 | Tibia              | wild?    | Mainz |                 |       |       |         |                  |              |              | Çakırlar, C. 2008, 2009 |
| Ulu34     | Vc EUV / Fundnr. 1971       | Ulucak Höyük | Turkey  | Neolithic                      | 6,400-5,900     |                                     |                     |                 | Metacarpus         | wild?    | Mainz |                 |       |       |         |                  |              |              | Çakırlar, C. 2008, 2009 |
| Ulu48     | Vc EUR / Fundnr. 1261       | Ulucak Höyük | Turkey  | Neolithic                      | 6,400-5,900     |                                     |                     | Neolithic       | Astragalus         | domestic | Mainz | Y1              |       |       |         |                  |              |              | Çakırlar, C. 2008, 2009 |
| Ulu49     | Vb EEL / Fundnr. 967        | Ulucak Höyük | Turkey  | Neolithic                      | 6,400-5,900     |                                     |                     | Neolithic       | Ulna               | domestic | Mainz | Y1              |       |       |         |                  |              |              | Çakırlar, C. 2008, 2009 |
| Ulu50     | Vb EHE / Fundnr. 874        | Ulucak Höyük | Turkey  | Neolithic                      | 6,400-5,900     |                                     |                     |                 | Maxilla with teeth | domestic | Mainz |                 |       |       |         |                  |              |              | Çakırlar, C. 2008, 2009 |

Evin A, Cucchi T, Cardini A, Strand Vidarsdottir U, Larson G, Dobney K. (2013). The long and winding road: Identifying pig domestication through molar size and shape. J Archaeol Sci 40 (1): 735-743.

**Supplementary table S2.** List of modern wild boars mapped in supplementary figure S2. Each specimen was assigned to a mtDNA clade (Larson et al. 2007) on the basis of genetic variation in long stretches of the mtDNA control region (380-661bp).

| ID sample            | GenBank    | country                                         | source                | Clade              |
|----------------------|------------|-------------------------------------------------|-----------------------|--------------------|
| GL52                 | AY884616.1 | Spain                                           | Larson et al. 2005    | European           |
| GL55                 | AY884619.1 | Turkey                                          | Larson et al. 2005    | Near Eastern - NE2 |
| GL59                 | AY884622.1 | Iran                                            | Larson et al. 2005    | Near Eastern - NE2 |
| GL63                 | AY884626.1 | Germany                                         | Larson et al. 2005    | European           |
| GL65 - feral         | AY884628.1 | Italy                                           | Larson et al. 2005    | Italian            |
| GL71                 | AY884633.1 | France                                          | Larson et al. 2005    | European           |
| GL73                 | AY884635.1 | Morocco                                         | Larson et al. 2005    | European           |
| GL77                 | AY884638.1 | Iran                                            | Larson et al. 2005    | Asiatic            |
| GL107                | AY884664.1 | Germany                                         | Larson et al. 2005    | European           |
| GL108                | AY884665.1 | Germany                                         | Larson et al. 2005    | European           |
| GL109                | AY884666.1 | Germany                                         | Larson et al. 2005    | European           |
| GL110 - feral        | AY884667.1 | France                                          | Larson et al. 2005    | European           |
| GL111 - feral        | AY884668.1 | Italy                                           | Larson et al. 2005    | European           |
| GL112                | AY884669.1 | Holland                                         | Larson et al. 2005    | European           |
| GL113                | AY884670.1 | Macedonia                                       | Larson et al. 2005    | European           |
| GL133 - feral        | AY884672.1 | Norway                                          | Larson et al. 2005    | European           |
| GL141                | AY884679.1 | Armenia                                         | Larson et al. 2005    | European           |
| GL142                | AY884680.1 | Armenia                                         | Larson et al. 2005    | Near Eastern - NE2 |
| GL143 - feral        | AY884681.1 | France                                          | Larson et al. 2005    | European           |
| GL144                | AY884682.1 | Italy                                           | Larson et al. 2005    | European           |
| GL190 - feral        | AY884690.1 | Italy                                           | Larson et al. 2005    | Italian            |
| GL193                | AY884693.1 | Armenia                                         | Larson et al. 2005    | Near Eastern - NE2 |
| GL194                | AY884694.1 | Armenia                                         | Larson et al. 2005    | Near Eastern - NE2 |
| GL220 - feral        | AY884696.1 | France                                          | Larson et al. 2005    | Near Eastern - NE2 |
| GL221                | AY884697.1 | Spain                                           | Larson et al. 2005    | European           |
| GL222                | AY884698.1 | Portugal                                        | Larson et al. 2005    | European           |
| GL236                | AY884710.1 | Armenia                                         | Larson et al. 2005    | Near Eastern - NE2 |
| GL242                | AY884714.1 | Spain                                           | Larson et al. 2005    | European           |
| GL244                | AY884716.1 | Italy                                           | Larson et al. 2005    | Italian            |
| GL245                | AY884717.1 | Italy                                           | Larson et al. 2005    | Italian            |
| GL246                | AY884718.1 | Italy                                           | Larson et al. 2005    | Italian            |
| GL247                | AY884719.1 | Italy                                           | Larson et al. 2005    | Italian            |
| GL248                | AY884720.1 | Italy                                           | Larson et al. 2005    | Italian            |
| GL249                | AY884721.1 | Italy                                           | Larson et al. 2005    | Italian            |
| GL250                | AY884722.1 | Italy                                           | Larson et al. 2005    | Italian            |
| GL251                | AY884723.1 | Italy                                           | Larson et al. 2005    | Italian            |
| GL252                | AY884724.1 | Italy                                           | Larson et al. 2005    | European           |
| GL254                | AY884725.1 | Iran                                            | Larson et al. 2005    | Near Eastern - NE1 |
| GL270                | AY884726.1 | Armenia                                         | Larson et al. 2005    | Near Eastern - NE1 |
| GL271                | AY884727.1 | Armenia                                         | Larson et al. 2005    | Near Eastern - NE2 |
| GL284 - feral        | AY884728.1 | France                                          | Larson et al. 2005    | European           |
| GL285 - feral        | AY884729.1 | France                                          | Larson et al. 2005    | European           |
| GL286 - feral        | AY884730.1 | France                                          | Larson et al. 2005    | European           |
| GL287 - feral        | AY884731.1 | France                                          | Larson et al. 2005    | European           |
| GL288 - feral        | AY884732.1 | Italy                                           | Larson et al. 2005    | European           |
| GL289 - feral        | AY884733.1 | Italy                                           | Larson et al. 2005    | European           |
| LCorsica82 - feral   | AY884796.1 | France                                          | Larson et al. 2005    | European           |
| LNSardinia88 - feral | AY884795.1 | Italy                                           | Larson et al. 2005    | European           |
| French Wild Boar     | AY884815.1 | France                                          | Larson et al. 2005    | European           |
| SWB1                 | AY232868   | Spain                                           | Alves et al. 2003     | European           |
| SWB2                 | AY232869   | Spain                                           | Alves et al. 2003     | European           |
| SWB3                 | AY232870   | Spain                                           | Alves et al. 2003     | European           |
| SWB6                 | AY232871   | Spain                                           | Alves et al. 2003     | European           |
| SWB4                 | AY232872   | Spain                                           | Alves et al. 2003     | European           |
| SWB5                 | AY232873   | Spain                                           | Alves et al. 2003     | European           |
| SWB7                 | AY232874   | Spain                                           | Alves et al. 2003     | European           |
| GiuPolEWB1           | AF136555   | Poland                                          | Giuffra et al. 2000   | European           |
| GiuPolEWB2           | AF136556   | Poland                                          | Giuffra et al. 2000   | European           |
| GiutalEWB3           | AF136563   | Italy                                           | Giuffra et al. 2000   | Italian            |
| GiulsrealWB (3)      | AF136558   | Israel                                          | Giuffra et al. 2000   | European           |
| Kijas01SwedishWB     | AF304203   | Sweden                                          | Kijas & Anderson 2001 | European           |
| GongFinnish36        | AF535163   | Finland                                         | Gongora et al. 2003   | European           |
| GongFinnish41        | AF535164   | Finland                                         | Gongora et al. 2003   | European           |
| GL374                | DQ872931.1 | Romania Dubova, Iron Gates                      | Larson et al. 2007    | European           |
| GL392                | DQ872932.1 | Romania                                         | Larson et al. 2007    | European           |
| GL724                | DQ872933.1 | Estonia Restaurant in Tallinn                   | Larson et al. 2007    | European           |
| GL748                | DQ872934.1 | Syria Amouk Plains                              | Larson et al. 2007    | Near Eastern - NE2 |
| GL749                | DQ872935.1 | Poland Bialystok Prov Bialowieza* National Park | Larson et al. 2007    | European           |
| GL750                | DQ872936.1 | Iraq Irbil, Baradost                            | Larson et al. 2007    | Near Eastern - NE2 |
| GL751                | DQ872937.1 | Iraq Baghdad, 3 mi S                            | Larson et al. 2007    | Near Eastern - NE1 |
| GL752                | DQ872938.1 | Iran Fars, Yasuj, 10.9 mi SW                    | Larson et al. 2007    | Near Eastern - NE2 |
| GL753                | DQ872939.1 | Iran Kermanshahan Kermanshah                    | Larson et al. 2007    | European           |
| GL754                | DQ872940.1 | Turkey Mersin (ifel) Tarsus Forest              | Larson et al. 2007    | Near Eastern - NE2 |
| GL766                | DQ872959.1 | Iraq Maysan, Amara, nr; Chahala                 | Larson et al. 2007    | European           |
| GL767                | DQ872960.1 | Iraq Diyala, Khanaquin, 10 mi from; Rhamalla    | Larson et al. 2007    | Near Eastern - NE1 |
| GL768                | DQ872943.1 | Syria Amouk Plains                              | Larson et al. 2007    | Near Eastern - NE2 |
| GL769                | DQ872944.1 | Iran Esfahan, Kuh Rang                          | Larson et al. 2007    | Near Eastern - NE2 |
| GL771                | DQ872945.1 | Iran Fars, Yasuj                                | Larson et al. 2007    | Near Eastern - NE1 |
| GL779                | DQ872946.1 | Iraq As Sulaymaniyah; Darband area, Zagros Mts  | Larson et al. 2007    | European           |
| GL781                | DQ872947.1 | Iran Kermanshahan                               | Larson et al. 2007    | Near Eastern - NE1 |
| GL782                | DQ872948.1 | Iran Khuzistan, Ahwaz                           | Larson et al. 2007    | Near Eastern - NE1 |
| GL783                | DQ872949.1 | Iran Khuzistan, Ahwaz-Andimeshk                 | Larson et al. 2007    | Near Eastern - NE1 |
| GL784                | DQ872950.1 | Iran Khuzistan, Ahwaz-Andimeshk                 | Larson et al. 2007    | Near Eastern - NE1 |
| GL786                | DQ872951.1 | Iran Kermanshahan, Kermanshah                   | Larson et al. 2007    | Asiatic            |
| GL787                | DQ872952.1 | Iran Mazandaran, Sama                           | Larson et al. 2007    | Asiatic            |
| GL788                | DQ872953.1 | Iran Maku                                       | Larson et al. 2007    | Near Eastern - NE2 |
| GL789                | DQ872954.1 | Iran Mazandaran, Gorgan                         | Larson et al. 2007    | Asiatic            |
| GL790                | DQ872955.1 | Iran Mazandaran, Gorgan                         | Larson et al. 2007    | Near Eastern - NE2 |
| GL791                | DQ872956.1 | Iran Mazandaran, Gorgan                         | Larson et al. 2007    | Asiatic            |
| GL792                | DQ872957.1 | Iran Sistan and Baluchistan, Zabol              | Larson et al. 2007    | Asiatic            |
| GL793                | DQ872958.1 | Iran Sistan and Baluchistan, Zabol              | Larson et al. 2007    | Asiatic            |
| GL794                | DQ872959.1 | Iran Sistan and Baluchistan, Zabol              | Larson et al. 2007    | Asiatic            |
| GL795                | DQ872960.1 | Iran Sistan and Baluchistan, Zabol              | Larson et al. 2007    | Asiatic            |
| GL799                | DQ872961.1 | Romania Dubova, Iron Gates                      | Larson et al. 2007    | European           |
| GL912                | DQ872962.1 | NW Persia                                       | Larson et al. 2007    | Near Eastern - NE2 |
| GL918                | DQ872963.1 | Russia Volga Delta                              | Larson et al. 2007    | European           |

|                  |            |                                      |                    |                    |
|------------------|------------|--------------------------------------|--------------------|--------------------|
| GL919            | DQ872964.1 | Russia Volga Delta                   | Larson et al. 2007 | European           |
| GL935            | DQ872965.1 | West Caucasus, north slope           | Larson et al. 2007 | European           |
| GL940            | DQ872966.1 | Turkey Smyrna (Izmir)                | Larson et al. 2007 | Near Eastern - NE2 |
| GL942 - domestic | DQ872967.1 | Sudan Nuba                           | Larson et al. 2007 | Near Eastern - NE2 |
| GL943            | DQ872968.1 | Egypt Egyptian                       | Larson et al. 2007 | Near Eastern - NE1 |
| GL944            | DQ872969.1 | Georgia Kavkaz from tiflis (Tbilisi) | Larson et al. 2007 | Near Eastern - NE1 |
| GL945            | DQ872970.1 | Slovakia                             | Larson et al. 2007 | European           |
| GL946            | DQ872971.1 | Hungary                              | Larson et al. 2007 | European           |
| GL948 - unknown  | DQ872972.1 | Greece Kos                           | Larson et al. 2007 | European           |
| GL949 - unknown  | DQ872973.1 | Greece Kos                           | Larson et al. 2007 | European           |
| GL951            | DQ872975.1 | Bulgaria                             | Larson et al. 2007 | European           |
| GL952 - wild?    | DQ872976.1 | Sudan                                | Larson et al. 2007 | Near Eastern - NE2 |
| GL1009           | DQ872980.1 | Turkmenistan                         | Larson et al. 2007 | Asiatic            |
| AR 2             |            | Armenia                              | present study      | European           |
| AR 298           |            | Armenia                              | present study      | European           |
| East AR          |            | Armenia                              | present study      | European           |
| Northeast AR     |            | Armenia                              | present study      | European           |
| IR 1             |            | Iran                                 | present study      | Near Eastern - NE2 |
| IR 2             |            | Iran                                 | present study      | Near Eastern - NE2 |
| IR 4             |            | Iran                                 | present study      | Near Eastern - NE2 |
| IR 5             |            | Iran                                 | present study      | Near Eastern - NE2 |
| TK 107           |            | Turkey                               | present study      | Near Eastern - NE2 |
| TK 119           |            | Turkey                               | present study      | Near Eastern - NE2 |
| TK 126           |            | Turkey                               | present study      | Near Eastern - NE2 |
| TP1              |            | Turkey                               | present study      | European           |
| TP10             |            | Turkey                               | present study      | Near Eastern - NE2 |
| TP11             |            | Turkey                               | present study      | Near Eastern - NE2 |
| TP12             |            | Turkey                               | present study      | Near Eastern - NE2 |
| TP2              |            | Turkey                               | present study      | Near Eastern - NE2 |
| TP3              |            | Turkey                               | present study      | Near Eastern - NE2 |
| TP4              |            | Turkey                               | present study      | Near Eastern - NE2 |
| TP5              |            | Turkey                               | present study      | Near Eastern - NE2 |
| TP6              |            | Turkey                               | present study      | Near Eastern - NE2 |
| TP7              |            | Turkey                               | present study      | Near Eastern - NE2 |
| TP8              |            | Turkey                               | present study      | Near Eastern - NE2 |
| TP9              |            | Turkey                               | present study      | Near Eastern - NE2 |
| WBTN 959         |            | Tunisia                              | present study      | European           |
| WBTN 960         |            | Tunisia                              | present study      | European           |
| WBTN 961         |            | Tunisia                              | present study      | European           |
| WBTN 962         |            | Tunisia                              | present study      | European           |
| WBTN 963         |            | Tunisia                              | present study      | European           |
| WBTN 964         |            | Tunisia                              | present study      | Near Eastern - NE2 |
| WBTN 965         |            | Tunisia                              | present study      | European           |
| WBTN 966         |            | Tunisia                              | present study      | European           |
| WBTR 514         |            | Turkey                               | present study      | European           |
| WBTR 515         |            | Turkey                               | present study      | Near Eastern - NE2 |
| WBTR 516         |            | Turkey                               | present study      | Near Eastern - NE2 |
| WBTR 517         |            | Turkey                               | present study      | Near Eastern - NE2 |
| WBRO 562         |            | Romania                              | present study      | European           |
| WBUA 1267        |            | Ukraine                              | present study      | European           |
| WBUA 1268        |            | Ukraine                              | present study      | European           |
| LG778 KS1        |            | Iran                                 | present study      | Near Eastern - NE1 |

Alves E, Ovilo C, Rodriguez MC, & Sillio L (2003) Mitochondrial DNA sequence variation and phylogenetic relationships among Iberian pigs and other domestic and wild pig populations. *Anim Genet* 34(5):319-324.

Giuffra E, et al. (2000) The origin of the domestic pig: independent domestication and subsequent introgression. *Genetics* 154(4):1785-1791.

Kijas JM & Andersson L (2001) A phylogenetic study of the origin of the domestic pig estimated from the near-complete mtDNA genome. *J Mol Evol* 52(3):302-308.

Gongora J, et al. (2008) Indo-European and Asian origins for Chilean and Pacific chickens revealed by mtDNA. *Proceedings of the National Academy of Sciences of the United States of America* 105(30):10308-10313.

Larson G, et al. (2005) Worldwide phylogeography of wild boar reveals multiple centers of pig domestication. *Science* 307(5715):1618-1621.

Larson G, et al. (2007) Ancient DNA, pig domestication, and the spread of the Neolithic into Europe. *Proc Natl Acad Sci U S A* 104(39):15276-15281.





**Supplementary table S4.** Polymorphic sites and associated haplotypes detected in the fragments ANC1 and ANC2 of the mtDNA control region in ancient pig specimens from the Near East. Alignment was done with a reference sequence, in bold (AJ002189, (Ursing and Arnason 1998)). Colors of mtDNA haplotypes and clades (NE2, Near Eastern clade 2; E, European) mimic those in figures 1 and 2. Positions are numbered according to Ursing and Arnason (1998). Haplotype assignment is based on Larson (2007). The status (wild versus domestic) of some of the specimens was provided following identification based on traditional metrics. Specimens for which status identification was not possible are left blank. Because traditional metrical methods for determining status are not necessarily conclusive (Evin et al. 2013), some of the status calls reported here may be subject to revision.

| ID sample | Site         | ANC1  |       |       |       |       |          |       |          |       |       | ANC2  |       |       |       |       |       |       |       | Haplotype | Clade | Date                       | Status     |
|-----------|--------------|-------|-------|-------|-------|-------|----------|-------|----------|-------|-------|-------|-------|-------|-------|-------|-------|-------|-------|-----------|-------|----------------------------|------------|
|           |              | 15522 | 15543 | 15546 | 15557 | 15558 | 15567.1T | 15577 | 15577.1A | 15587 | 15592 | 15714 | 15723 | 15724 | 15729 | 15733 | 15741 | 15744 | 15758 |           |       |                            |            |
| BAD4      | Bademağacı   | G     | C     | C     | T     | A     | -        | A     | -        | T     | G     |       |       |       |       |       |       |       |       | Y1        | NE2   | Early Neolithic II - 4A    | wild       |
| BAD5      | Bademağacı   | G     | C     | C     | T     | A     | -        | A     | -        | T     | G     | C     | A     | C     | A     | C     | C     | G     | T     | Y1        | NE2   | Early Neolithic II - 4A    | wild       |
| BAD52     | Bademağacı   | G     | C     | C     | T     | A     | T        | A     | -        | T     | A     | C     | A     | C     | A     | C     | T     | G     | T     | Arm1T     | NE2   | Early Neolithic II - 4A    | domestic   |
| BAD54     | Bademağacı   | G     | C     | C     | T     | A     | T        | A     | -        | T     | A     | C     | A     | C     | A     | C     | T     | G     | T     | Arm1T     | NE2   | Early Neolithic II - 4A    | domestic   |
| BAD63     | Bademağacı   | G     | C     | C     | T     | A     | -        | A     | -        | T     | G     | C     | A     | C     | A     | C     | C     | G     | T     | Y1        | NE2   | Early Neolithic II - 4B    | domestic   |
| BAD10     | Bademağacı   | G     | C     | C     | T     | A     | -        | A     | -        | T     | G     | C     | A     | C     | A     | C     | C     | G     | T     | Y1        | NE2   | Early Neolithic II - 3     | domestic   |
| BAD9      | Bademağacı   | A     | C     | C     | T     | A     | T        | A     | -        | T     | A     | C     | A     | C     | A     | C     | T     | G     | T     | Arm1T     | NE2   | Early Neolithic II - 3A    | wild       |
| BAD47     | Bademağacı   | G     | C     | C     | T     | A     | -        | A     | -        | T     | G     | C     | A     | C     | G     | C     | C     | G     | T     | Y1        | NE2   | Early Neolithic II - 3A    | domestic   |
| BAD30     | Bademağacı   | G     | C     | C     | T     | A     | -        | A     | -        | T     | G     | C     | A     | C     | G     | C     | C     | G     | T     | Y1        | NE2   | Early Neolithic II - 2     | domestic   |
| BAD32     | Bademağacı   | G     | C     | C     | T     | A     | -        | A     | -        | T     | G     | C     | A     | C     | A     | C     | C     | G     | T     | Y1        | NE2   | Early Neolithic II - 3     | domestic   |
| BAD15     | Bademağacı   | G     | C     | C     | T     | A     | -        | -     | -        | T     | G     | C     | A     | C     | A     | C     | C     | G     | T     | Y2        | NE2   | Early Bronze Age II        | domestic   |
| BAD16     | Bademağacı   | G     | C     | C     | T     | A     | T        | A     | -        | T     | A     | C     | A     | C     | A     | C     | T     | G     | T     | Arm1T     | NE2   | Early Bronze Age II        | domestic ? |
| BAD17     | Bademağacı   | G     | C     | C     | T     | A     | -        | A     | -        | T     | G     | C     | A     | C     | A     | C     | C     | G     | T     | Y1        | NE2   | Early Bronze Age II        | domestic   |
| BAD18     | Bademağacı   | G     | C     | C     | T     | A     | T        | A     | -        | T     | A     | C     | A     | C     | A     | C     | T     | G     | T     | Arm1T     | NE2   | Early Bronze Age II        | domestic   |
| BAD83     | Bademağacı   | G     | C     | C     | T     | A     | -        | A     | -        | T     | G     | C     | A     | C     | A     | C     | C     | G     | T     | Y1        | NE2   | Early Bronze Age II        | domestic   |
| BAD84     | Bademağacı   | G     | C     | C     | T     | A     | -        | A     | -        | T     | G     | C     | A     | C     | G     | C     | C     | G     | T     | Y1        | NE2   | Early Bronze Age II        | wild       |
| BAD85     | Bademağacı   | G     | C     | C     | T     | A     | -        | A     | -        | T     | G     | C     | G     | C     | A     | C     | C     | G     | T     | Y1        | NE2   | Early Bronze Age II        | wild       |
| BAD86     | Bademağacı   | G     | C     | C     | T     | A     | -        | A     | -        | T     | G     | C     | A     | C     | G     | C     | C     | G     | T     | Y1        | NE2   | Early Bronze Age II        | wild       |
| BAD87     | Bademağacı   | G     | C     | C     | T     | A     | -        | A     | -        | T     | G     | C     | A     | C     | G     | C     | C     | G     | T     | Y1        | NE2   | Early Bronze Age II        | wild       |
| M120      | Hassek Höyük | G     | C     | C     | T     | A     | T        | A     | -        | T     | A     | C     | A     | C     | A     | C     | T     | G     | T     | Arm1T     | NE2   | Chalcolithic               | domestic   |
| M123      | Hassek Höyük | G     | C     | C     | C     | A     | T        | A     | -        | T     | A     | C     | A     | C     | A     | C     | T     | G     | T     | Arm1T     | NE2   | Chalcolithic               | domestic   |
| M124      | Hassek Höyük | G     | C     | C     | T     | A     | -        | A     | -        | T     | G     | C     | A     | C     | A     | C     | C     | G     | T     | Y1        | NE2   | Chalcolithic               | domestic   |
| M18       | Hassek Höyük | G     | C     | C     | T     | A     | T        | A     | -        | T     | A     | C     | A     | C     | A     | C     | T     | G     | T     | Arm1T     | NE2   | Early Bronze Age           | domestic   |
| M85       | Lidar Höyük  | G     | C     | C     | T     | A     | T        | A     | -        | T     | A     | C     | A     | C     | A     | C     | T     | G     | T     | Arm1T     | NE2   | Early Bronze Age (AMS)     | domestic   |
| M86       | Lidar Höyük  | G     | C     | C     | T     | A     | T        | A     | -        | T     | A     | C     | A     | C     | A     | C     | T     | G     | T     | Arm1T     | NE2   | Early Bronze Age           | domestic   |
| M87       | Lidar Höyük  | G     | C     | C     | T     | A     | T        | A     | -        | T     | A     | C     | A     | C     | A     | C     | T     | G     | T     | Arm1T     | NE2   | Early Bronze Age           | domestic   |
| M88       | Lidar Höyük  | G     | C     | C     | T     | A     | T        | A     | -        | T     | A     | C     | A     | C     | A     | C     | T     | G     | T     | Arm1T     | NE2   | Early Bronze Age           | domestic   |
| M90       | Lidar Höyük  | G     | C     | C     | T     | A     | T        | A     | -        | T     | A     | C     | A     | C     | A     | C     | T     | G     | T     | Arm1T     | NE2   | Early Bronze Age           | domestic   |
| M64       | Lidar Höyük  | G     | C     | C     | T     | A     | T        | A     | -        | T     | A     | C     | A     | C     | A     | C     | T     | G     | T     | Arm1T     | NE2   | Middle Bronze Age II/I     | domestic   |
| M68       | Lidar Höyük  | G     | C     | C     | T     | A     | -        | -     | -        | T     | G     | C     | A     | C     | A     | C     | C     | G     | T     | Y2        | NE2   | Middle Bronze Age II/I     | domestic   |
| M71       | Lidar Höyük  | G     | C     | C     | T     | A     | T        | A     | -        | T     | A     | C     | A     | C     | A     | C     | T     | G     | C     | Arm1T     | NE2   | Middle Bronze Age II/I     | domestic   |
| M73       | Lidar Höyük  | G     | C     | C     | T     | A     | -        | -     | -        | T     | G     | C     | A     | C     | A     | C     | C     | G     | T     | Y2        | NE2   | Middle Bronze Age II/I     | domestic   |
| M74       | Lidar Höyük  | G     | C     | C     | T     | A     | T        | A     | -        | T     | A     | C     | A     | C     | A     | C     | T     | G     | T     | Arm1T     | NE2   | Middle Bronze Age II/I     | domestic   |
| M47       | Lidar Höyük  | G     | C     | C     | T     | A     | T        | A     | -        | T     | A     | C     | A     | C     | A     | C     | T     | G     | T     | Arm1T     | NE2   | Middle Bronze Age II       | domestic   |
| M48       | Lidar Höyük  | G     | C     | C     | T     | A     | -        | -     | -        | T     | G     | C     | A     | C     | A     | C     | C     | G     | T     | Y2        | NE2   | Middle Bronze Age II       | wild       |
| M50       | Lidar Höyük  | G     | C     | C     | T     | A     | T        | A     | -        | T     | A     | C     | A     | C     | A     | C     | T     | G     | T     | Arm1T     | NE2   | Middle Bronze Age II       | domestic   |
| M49       | Lidar Höyük  | G     | C     | C     | T     | A     | T        | A     | -        | T     | A     | C     | A     | C     | A     | C     | T     | G     | T     | Arm1T     | NE2   | Middle Bronze Age II       | domestic   |
| M51       | Lidar Höyük  | G     | T     | C     | T     | T     | -        | A     | -        | C     | A     | C     | A     | C     | A     | C     | C     | G     | C     | A         | E     | Late Bronze/Iron Age (AMS) | domestic   |
| M52       | Lidar Höyük  | G     | T     | C     | T     | T     | -        | A     | -        | C     | A     | C     | A     | C     | A     | C     | C     | G     | C     | A         | E     | Middle Bronze Age II       | domestic   |
| M75       | Lidar Höyük  | G     | C     | C     | T     | A     | -        | -     | -        | T     | G     | C     | A     | C     | A     | C     | C     | G     | T     | Y2        | NE2   | Late Bronze Age            | domestic   |
| M76       | Lidar Höyük  | G     | T     | C     | T     | T     | -        | A     | -        | C     | A     | C     | A     | C     | A     | C     | C     | G     | C     | A         | E     | Iron Age (AMS)             | domestic   |
| M77       | Lidar Höyük  | G     | C     | C     | T     | A     | T        | A     | -        | T     | A     | C     | A     | C     | A     | C     | T     | G     | T     | Arm1T     | NE2   | Late Bronze Age            | domestic   |
| M78       | Lidar Höyük  | G     | T     | C     | T     | T     | -        | A     | -        | C     | A     | C     | A     | C     | A     | C     | C     | G     | C     | A         | E     | Late Bronze/Iron Age (AMS) | domestic   |
| M79       | Lidar Höyük  | G     | C     | C     | T     | A     | T        | A     | -        | T     | A     | T     | A     | C     | A     | C     | T     | G     | T     | Arm1T     | NE2   | Late Bronze Age            | wild       |
| M80       | Lidar Höyük  | G     | C     | C     | T     | A     | T        | A     | -        | T     | A     | T     | A     | C     | A     | C     | T     | G     | T     | Arm1T     | NE2   | Late Bronze Age            | wild       |
| M81       | Lidar Höyük  | G     | C     | C     | T     | A     | T        | A     | -        | T     | A     | C     | A     | C     | A     | C     | T     | G     | C     | Arm1T     | NE2   | Late Bronze Age            | domestic   |
| M82       | Lidar Höyük  | G     | T     | C     | T     | T     | -        | A     | -        | C     | A     | C     | A     | C     | A     | C     | C     | G     | C     | A         | E     | Late Bronze Age (AMS)      | domestic   |
| M83       | Lidar Höyük  | G     | C     | C     | T     | A     | T        | A     | -        | T     | A     | C     | A     | C     | A     | C     | T     | G     | T     | Arm1T     | NE2   | Late Bronze Age            | domestic   |
| M93       | Lidar Höyük  | G     | C     | C     | T     | A     | T        | A     | -        | T     | A     | C     | A     | C     | A     | C     | T     | G     | T     | Arm1T     | NE2   | Iron Age                   | domestic   |
| M94       | Lidar Höyük  | G     | C     | C     | T     | A     | T        | A     | -        | T     | A     | C     | A     | C     | A     | C     | T     | G     | T     | Arm1T     | NE2   | Iron Age                   | domestic   |
| M95       | Lidar Höyük  | G     | C     | C     | T     | A     | T        | A     | -        | T     | A     | C     | A     | C     | A     | C     | T     | G     | T     | Arm1T     | NE2   | Iron Age                   | domestic   |
| M96       | Lidar Höyük  | G     | T     | C     | T     | T     | -        | A     | -        | C     | A     | C     | A     | C     | A     | C     | C     | G     | C     | A         | E     | Iron Age                   | domestic   |
| M97       | Lidar Höyük  | G     | T     | C     | T     | T     | -        | A     | -        | C     | A     | C     | A     | C     | A     | C     | C     | G     | C     | A         | E     | Iron Age                   | domestic   |
| M98       | Lidar Höyük  | G     | T     | C     | T     | T     | -        | A     | -        | C     | A     | C     | A     | C     | A     | C     | C     | G     | C     | A         | E     | Iron Age                   | domestic   |

| ID sample | Site           | ANC1  |       |       |       |       |          |       |          |       |       | ANC2  |       |       |       |       |       |       |       | Haplotype            | Clade | Date                               | Status   |
|-----------|----------------|-------|-------|-------|-------|-------|----------|-------|----------|-------|-------|-------|-------|-------|-------|-------|-------|-------|-------|----------------------|-------|------------------------------------|----------|
|           |                | 15522 | 15543 | 15546 | 15557 | 15558 | 15567.1T | 15577 | 15577.1A | 15587 | 15592 | 15714 | 15723 | 15724 | 15729 | 15733 | 15741 | 15744 | 15758 |                      |       |                                    |          |
| M99       | Lidar Höyük    | G     | C     | C     | T     | A     | -        | -     | -        | T     | G     | C     | A     | C     | A     | C     | C     | G     | T     | Y2                   | NE2   | Iron Age                           | domestic |
| M100      | Lidar Höyük    | G     | T     | C     | T     | T     | -        | A     | -        | C     | A     | C     | A     | C     | A     | C     | C     | G     | C     | A                    | E     | Iron Age                           | domestic |
| M101      | Lidar Höyük    | G     | C     | C     | T     | A     | T        | A     | -        | T     | A     | C     | A     | C     | A     | C     | T     | G     | T     | Arm1T                | NE2   | Iron Age                           | domestic |
| M40       | Lidar Höyük    | G     | C     | C     | T     | A     | T        | A     | -        | T     | A     | C     | A     | C     | A     | C     | T     | G     | T     | Arm1T                | NE2   | Hellenistic-Roman                  | domestic |
| M42       | Lidar Höyük    | G     | T     | C     | T     | T     | -        | A     | -        | C     | A     | C     | A     | C     | A     | C     | C     | G     | C     | A                    | E     | Hellenistic-Roman                  | domestic |
| M44       | Lidar Höyük    | G     | T     | C     | T     | T     | -        | A     | -        | C     | A     | C     | A     | C     | A     | C     | C     | G     | C     | A                    | E     | Hellenistic-Roman                  | domestic |
| M45       | Lidar Höyük    | G     | T     | C     | T     | T     | -        | A     | -        | C     | A     | C     | A     | C     | A     | C     | C     | G     | C     | A                    | E     | Hellenistic-Roman                  | domestic |
| M46       | Lidar Höyük    | G     | C     | C     | T     | A     | T        | A     | -        | T     | A     | C     | A     | C     | G     | C     | T     | G     | T     | Arm1T                | NE2   | Hellenistic-Roman                  | domestic |
| M53       | Lidar Höyük    | G     | T     | C     | T     | T     | -        | A     | -        | C     | A     | C     | A     | C     | A     | C     | C     | G     | C     | A                    | E     | Medieval                           | domestic |
| M54       | Lidar Höyük    | G     | T     | C     | T     | T     | -        | A     | -        | C     | A     | C     | A     | C     | A     | C     | C     | G     | T     | A                    | E     | Medieval                           | domestic |
| M55       | Lidar Höyük    | G     | T     | C     | T     | T     | -        | A     | -        | C     | A     | C     | A     | C     | A     | C     | C     | G     | C     | A                    | E     | Medieval                           | domestic |
| M56       | Lidar Höyük    | G     | T     | C     | T     | T     | -        | A     | A        | C     | A     | C     | A     | C     | G     | C     | C     | G     | C     | A                    | E     | Medieval                           | domestic |
| M57       | Lidar Höyük    | G     | T     | C     | T     | T     | -        | A     | -        | C     | A     | C     | A     | C     | A     | C     | C     | G     | C     | A                    | E     | Medieval                           | domestic |
| M58       | Lidar Höyük    | G     | T     | C     | T     | T     | -        | A     | -        | C     | A     | C     | A     | C     | A     | C     | C     | G     | C     | A                    | E     | Medieval                           | domestic |
| M59       | Lidar Höyük    | G     | T     | C     | T     | T     | -        | A     | -        | C     | A     | C     | A     | C     | A     | C     | C     | G     | C     | A                    | E     | Medieval                           | domestic |
| F13       | Düzen Tepe     | G     | T     | C     | T     | T     | -        | A     | -        | C     | A     | C     | A     | C     | A     | T     | C     | G     | C     | A                    | E     | 6th-3rd cent BC                    | domestic |
| F15       | Düzen Tepe     | G     | T     | C     | T     | T     | -        | A     | -        | C     | A     | C     | A     | C     | A     | C     | C     | G     | C     | A                    | E     | 6th-3rd cent BC                    | domestic |
| F20       | Düzen Tepe     | G     | T     | C     | T     | T     | -        | A     | -        | C     | A     | C     | A     | C     | A     | C     | C     | G     | C     | A                    | E     | 6th-3rd cent BC                    | domestic |
| F21       | Düzen Tepe     | G     | T     | C     | T     | A     | -        | A     | -        | C     | A     | C     | A     | C     | A     | C     | C     | G     | T     | C                    | E     | 6th-3rd cent BC                    | domestic |
| SA133     | Sagalassos     | G     | T     | C     | T     | T     | -        | A     | -        | C     | A     | C     | A     | C     | A     | C     | C     | G     | C     | A                    | E     | Early Byzantine (450-650 AD)       | domestic |
| SA139     | Sagalassos     | G     | T     | C     | T     | T     | -        | A     | -        | C     | A     | C     | A     | C     | A     | C     | C     | G     | C     | A                    | E     | Early Byzantine (450-650 AD)       | domestic |
| SA223     | Sagalassos     | G     | T     | C     | T     | T     | -        | A     | -        | C     | A     | C     | A     | C     | A     | C     | C     | G     | C     | A                    | E     | Early Byzantine (450-650 AD)       | domestic |
| SA510     | Sagalassos     | G     | T     | C     | T     | T     | -        | A     | -        | C     | A     | C     | A     | C     | A     | C     | C     | G     | C     | A                    | E     | Early Byzantine (450-650 AD)       | domestic |
| SA941     | Sagalassos     | G     | T     | C     | T     | T     | -        | A     | -        | C     | A     | C     | A     | C     | A     | C     | C     | G     | C     | A                    | E     | Early Byzantine (450-650 AD)       | domestic |
| SA988     | Sagalassos     | G     | T     | C     | T     | T     | -        | A     | -        | C     | A     | C     | A     | C     | A     | C     | C     | G     | C     | A                    | E     | Early Byzantine (450-650 AD)       | domestic |
| SA1193    | Sagalassos     | G     | T     | C     | T     | T     | -        | A     | -        | C     | A     | C     | A     | C     | A     | C     | C     | G     | C     | A                    | E     | Early Byzantine (450-650 AD)       | domestic |
| SA1227    | Sagalassos     | G     | T     | C     | T     | T     | -        | A     | -        | C     | A     | C     | A     | C     | A     | C     | C     | G     | C     | A                    | E     | Early Byzantine (450-650 AD)       | domestic |
| SA295     | Sagalassos     | G     | T     | C     | T     | T     | -        | A     | -        | C     | A     | C     | A     | C     | A     | C     | C     | G     | C     | A                    | E     | Late Roman (Imperial) (300-450 AD) | domestic |
| SA298     | Sagalassos     | G     | T     | C     | T     | T     | -        | A     | -        | C     | A     | C     | A     | C     | A     | C     | C     | G     | C     | A                    | E     | Late Roman (Imperial) (300-450 AD) | domestic |
| SA398     | Sagalassos     | G     | T     | C     | T     | A     | -        | A     | -        | C     | A     | C     | A     | C     | A     | C     | C     | G     | T     | C                    | E     | Late Roman (Imperial) (300-450 AD) | domestic |
| SA400     | Sagalassos     | G     | T     | C     | T     | T     | -        | A     | -        | C     | A     | C     | A     | C     | A     | C     | C     | G     | C     | A                    | E     | Late Roman (Imperial) (300-450 AD) | domestic |
| SA791     | Sagalassos     | G     | T     | C     | T     | T     | -        | A     | -        | C     | A     | C     | A     | C     | A     | C     | C     | G     | C     | A                    | E     | Late Roman (Imperial) (300-450 AD) | domestic |
| SA1301    | Sagalassos     | G     | T     | C     | T     | T     | -        | A     | -        | C     | A     | C     | A     | C     | A     | C     | T     | G     | C     | A                    | E     | Late Roman (Imperial) (300-450 AD) | domestic |
| SA1302    | Sagalassos     | G     | T     | C     | T     | T     | -        | A     | -        | C     | A     | C     | A     | C     | A     | C     | C     | G     | C     | A                    | E     | Late Roman (Imperial) (300-450 AD) | domestic |
| SA1315    | Sagalassos     | G     | T     | C     | T     | T     | -        | A     | -        | T     | A     | C     | A     | C     | A     | C     | C     | G     | C     | LDomBritSad<br>dle01 | E     | Late Roman (Imperial) (300-450 AD) | domestic |
| SA1203    | Sagalassos     | G     | T     | C     | T     | T     | -        | A     | -        | C     | A     | C     | A     | C     | A     | C     | C     | G     | C     | A                    | E     | Early to Mid Imperial (0-300 AD)   | domestic |
| SA1230    | Sagalassos     | G     | T     | C     | T     | T     | -        | A     | -        | C     | A     | C     | A     | C     | A     | C     | C     | G     | C     | A                    | E     | Early to Mid Imperial (0-300 AD)   | domestic |
| SA405     | Sagalassos     | G     | T     | C     | T     | T     | -        | A     | -        | C     | A     | C     | A     | C     | A     | C     | C     | G     | C     | A                    | E     | 0-1200 AD                          | domestic |
| SA406     | Sagalassos     | G     | T     | C     | T     | T     | -        | A     | -        | C     | A     | C     | A     | C     | A     | C     | C     | G     | C     | A                    | E     | 0-1200 AD                          | domestic |
| LG011     | Gohar Tappeh   | G     | C     | C     | T     | A     | T        | A     | -        | T     | A     |       |       |       |       |       |       |       |       | Arm1T                | NE2   | Early Bronze Age                   |          |
| LG017     | Qaleh Rostam   | G     | C     | C     | T     | A     | T        | A     | -        | T     | A     |       |       |       |       |       |       |       |       | Arm1T                | NE2   | Neolithic                          |          |
| LG067     | Qareh Doyub    | G     | C     | C     | T     | A     | T        | A     | -        | T     | A     |       |       |       |       |       |       |       |       | Arm1T                | NE2   | Historical                         |          |
| LG069     | Qel'ich Qöineq | G     | C     | C     | T     | A     | T        | A     | -        | T     | A     |       |       |       |       |       |       |       |       | Arm1T                | NE2   | Achemenid                          |          |
| LG070     | Qel'ich Qöineq | G     | C     | C     | T     | A     | T        | A     | -        | T     | A     |       |       |       |       |       |       |       |       | Arm1T                | NE2   | Achemenid                          |          |
| LG071     | Qel'ich Qöineq | G     | C     | C     | T     | A     | T        | A     | -        | T     | A     |       |       |       |       |       |       |       |       | Arm1T                | NE2   | Achemenid                          |          |
| LG073     | Dasht Qaleh    | G     | C     | C     | T     | A     | T        | A     | -        | T     | A     |       |       |       |       |       |       |       |       | Arm1T                | NE2   | Achemenid                          |          |
| LG109     | Lidar Höyük    | G     | T     | C     | T     | T     | -        | A     | -        | C     | A     | C     | A     | C     | A     | C     | C     | G     | C     | A                    | E     | Late Bronze/Iron Age (AMS)         |          |
| LG110     | Lidar Höyük    | G     | T     | C     | T     | T     | -        | A     | -        | C     | A     | C     | A     | C     | A     | C     | C     | G     | C     | A                    | E     | Late Bronze/Iron Age (AMS)         |          |
| LG111     | Lidar Höyük    | G     | C     | C     | T     | A     | T        | A     | -        | T     | A     | C     | A     | C     | A     | C     | T     | G     | T     | Arm1T                | NE2   | MBA II/III ? (uncertain)           |          |
| LG112     | Lidar Höyük    | G     | C     | C     | T     | A     | -        | -     | -        | T     | G     |       |       |       |       |       |       |       |       | Y2                   | NE2   | Late Bronze Age                    |          |
| LG114     | Lidar Höyük    | G     | T     | Y     | T     | T     | -        | A     | -        | C     | A     |       |       |       |       |       |       |       |       | A                    | E     | Late Bronze/Iron Age (AMS)         |          |
| LG115     | Lidar Höyük    | G     | C     | C     | T     | A     | T        | A     | -        | T     | A     | C     | A     | C     | A     | C     | T     | G     | T     | Arm1T                | NE2   | Middle Bronze Age III/I            |          |
| LG137     | Lidar Höyük    | G     | T     | C     | T     | T     | -        | A     | -        | C     | A     | C     | A     | C     | G     | C     | C     | G     | C     | A                    | E     | Medieval (AMS)                     |          |
| LG217     | Kohneh Tepesi  | G     | C     | C     | T     | A     | T        | A     | -        | T     | A     |       |       |       |       |       |       |       |       | Arm1T                | NE2   | Bronze Age                         |          |
| LG219     | Kohneh Tepesi  | G     | C     | C     | T     | A     | T        | A     | -        | T     | A     | C     | A     | C     | A     | C     | T     | G     | T     | Arm1T                | NE2   | Bronze Age                         |          |

| ID sample | Site             | ANC1  |       |       |       |       |          |       |          |       |       | ANC2  |       |       |       |       |       |                       |       | Haplotype                | Clade            | Date | Status |
|-----------|------------------|-------|-------|-------|-------|-------|----------|-------|----------|-------|-------|-------|-------|-------|-------|-------|-------|-----------------------|-------|--------------------------|------------------|------|--------|
|           |                  | 15522 | 15543 | 15546 | 15557 | 15558 | 15567.1T | 15577 | 15577.1A | 15587 | 15592 | 15714 | 15723 | 15724 | 15729 | 15733 | 15741 | 15744                 | 15758 |                          |                  |      |        |
| LG221     | Kohne Tepesi     | G     | C     | C     | T     | A     | T        | A     | -        | T     | A     | T     | A     | C     | T     | G     | T     | Arm1T                 | NE2   | Bronze Age               |                  |      |        |
| LG222     | Kohne Tepesi     | G     | C     | C     | T     | A     | T        | A     | -        | T     | A     | C     | A     | C     | T     | G     | T     | Arm1T                 | NE2   | Bronze Age               |                  |      |        |
| LG223     | Haftavan         | G     | C     | C     | T     | A     | T        | A     | -        | T     | A     | C     | A     | C     | T     | G     | T     | Arm1T                 | NE2   | Middle & Late Bronze Age |                  |      |        |
| LG224     | Haftavan         | G     | C     | C     | T     | A     | T        | A     | -        | T     | A     | C     | A     | C     | T     | G     | T     | Arm1T                 | NE2   | Middle & Late Bronze Age |                  |      |        |
| LG225     | Haftavan         | G     | C     | C     | T     | A     | T        | A     | -        | T     | A     | C     | A     | C     | T     | G     | T     | Arm1T                 | NE2   | Middle & Late Bronze Age |                  |      |        |
| LG226     | Doshan Tepe      | G     | C     | C     | T     | A     | T        | A     | -        | T     | A     | C     | A     | C     | T     | G     | T     | Arm1T                 | NE2   | Iron Age                 |                  |      |        |
| LG227     | Doshan Tepe      | G     | C     | C     | T     | A     | T        | A     | -        | T     | A     | C     | A     | C     | T     | G     | T     | Arm1T                 | NE2   | Iron Age                 |                  |      |        |
| LG241     | Areni-1          | G     | C     | C     | T     | A     | T        | A     | -        | T     | A     | C     | A     | C     | T     | G     | T     | Arm1T                 | NE2   | Chalcolithic             |                  |      |        |
| LG247     | Tsakayeghtsi     | G     | T     | C     | T     | T     | -        | A     | -        | C     | A     | C     | A     | C     | C     | G     | C     | A                     | E     | E                        | Medieval         |      |        |
| LG248     | Sevkar 4         | G     | T     | C     | T     | T     | -        | A     | -        | C     | A     | C     | A     | C     | C     | G     | C     | A                     | E     | E                        | Iron Age         |      |        |
| LG249     | Lehashen 2       | G     | C     | C     | T     | A     | T        | A     | -        | T     | A     | C     | A     | C     | T     | G     | T     | Arm1T                 | NE2   | Middle Bronze Age        |                  |      |        |
| LG251     | Lidar Höyük      | G     | C     | C     | T     | A     | T        | A     | -        | T     | A     | C     | A     | C     | T     | G     | T     | Arm1T                 | NE2   | Iron Age                 |                  |      |        |
| LG252     | Lidar Höyük      | G     | C     | C     | T     | A     | -        | -     | -        | T     | G     | C     | A     | C     | C     | G     | T     | Y2                    | NE2   | Iron Age                 |                  |      |        |
| LG253     | Lidar Höyük      | G     | C     | C     | T     | A     | -        | -     | -        | T     | G     | C     | A     | C     | C     | G     | Y     | Y2                    | NE2   | Late Bronze Age          |                  |      |        |
| LG254     | Lidar Höyük      | G     | C     | C     | T     | A     | -        | -     | -        | T     | G     | C     | A     | C     | C     | G     | Y     | Y2                    | NE2   | Late Bronze Age          |                  |      |        |
| LG276     | Malyan           | G     | C     | C     | T     | A     | T        | A     | -        | T     | A     | C     | A     | C     | T     | G     | T     | Arm1T                 | NE2   | Bronze Age/iron Age      |                  |      |        |
| LG281     | Leilan           | G     | C     | C     | T     | A     | T        | A     | -        | T     | A     | C     | A     | C     | T     | G     | T     | Arm1T                 | NE2   | Early/Middle Bronze Age  |                  |      |        |
| LG289     | Leilan           | G     | C     | C     | T     | A     | T        | A     | -        | T     | A     | C     | A     | C     | T     | G     | T     | Arm1T                 | NE2   | Early/Middle Bronze Age  |                  |      |        |
| LG350     | Gordion          | G     | T     | C     | T     | T     | -        | A     | A        | C     | A     | C     | A     | C     | C     | G     | C     | LDomGerma<br>nyAngler | E     | E                        | Late Hellenistic |      |        |
| LG351     | Gordion          | G     | C     | C     | T     | A     | T        | A     | -        | T     | A     | C     | A     | C     | T     | G     | T     | Arm1T                 | NE2   | Late Bronze Age?         |                  |      |        |
| LG352     | Gordion          | G     | C     | C     | T     | A     | T        | A     | -        | T     | A     | C     | A     | C     | T     | G     | T     | Arm1T                 | NE2   | Late Bronze Age          |                  |      |        |
| LG353     | Gordion          | G     | T     | C     | T     | T     | -        | A     | -        | C     | A     | C     | A     | C     | C     | G     | C     | A                     | E     | E                        | Late Phrygian    |      |        |
| LG354     | Gordion          | G     | C     | C     | T     | A     | -        | A     | -        | T     | A     | C     | A     | C     | C     | G     | T     | Yellow star           | NE2   | Late Bronze Age          |                  |      |        |
| LG356     | Gordion          | G     | C     | C     | T     | A     | -        | A     | -        | T     | G     | C     | A     | C     | C     | G     | T     | Y1                    | NE2   | Late Phrygian            |                  |      |        |
| LG414     | Mehr Ali         | G     | C     | C     | T     | A     | T        | A     | -        | T     | A     | C     | A     | C     | T     | G     | T     | Arm1T                 | NE2   | Late Chalcolithic        |                  |      |        |
| LG459     | Çayönü           | G     | C     | C     | T     | A     | T        | A     | -        | T     | A     | C     | A     | C     | T     | G     | T     | Arm1T                 | NE2   | Pottery neolithic        |                  |      |        |
| LG475     | Çamlıbel Tarlası | G     | C     | C     | T     | A     | T        | A     | -        | T     | A     | C     | A     | C     | T     | G     | T     | Arm1T                 | NE2   | Chalcolithic             |                  |      |        |
| LG476     | Çamlıbel Tarlası | G     | C     | C     | T     | A     | T        | A     | -        | T     | A     | C     | A     | C     | T     | G     | T     | Arm1T                 | NE2   | Chalcolithic             |                  |      |        |
| LG477     | Çamlıbel Tarlası | G     | C     | C     | T     | A     | -        | A     | -        | T     | G     | C     | A     | C     | C     | G     | T     | Y1                    | NE2   | Chalcolithic             |                  |      |        |
| LG479     | Çamlıbel Tarlası | G     | C     | C     | T     | A     | -        | A     | -        | T     | G     | C     | A     | C     | C     | G     | T     | Y1                    | NE2   | Chalcolithic             |                  |      |        |
| LG480     | Çamlıbel Tarlası | G     | C     | C     | T     | A     | T        | A     | -        | T     | A     | C     | A     | C     | T     | G     | T     | Arm1T                 | NE2   | Chalcolithic             |                  |      |        |
| LG485     | Çamlıbel Tarlası | G     | C     | C     | T     | A     | -        | A     | -        | T     | G     | C     | A     | C     | C     | G     | T     | Y1                    | NE2   | Chalcolithic             |                  |      |        |
| LG486     | Çamlıbel Tarlası | G     | C     | C     | T     | A     | -        | A     | -        | T     | G     | C     | A     | C     | C     | G     | T     | Y1                    | NE2   | Chalcolithic             |                  |      |        |
| LG488     | Çamlıbel Tarlası | G     | C     | C     | T     | A     | T        | A     | -        | T     | A     | C     | A     | C     | T     | G     | T     | Arm1T                 | NE2   | Chalcolithic             |                  |      |        |
| LG489     | Çamlıbel Tarlası | G     | C     | C     | T     | A     | -        | A     | -        | T     | G     | C     | A     | C     | C     | G     | T     | Y1                    | NE2   | Chalcolithic             |                  |      |        |
| LG491     | Çamlıbel Tarlası | G     | C     | C     | T     | A     | T        | A     | -        | T     | A     | C     | A     | C     | T     | G     | T     | Arm1T                 | NE2   | Chalcolithic             |                  |      |        |
| LG492     | Çamlıbel Tarlası | G     | C     | C     | T     | A     | T        | A     | -        | T     | A     | C     | A     | C     | T     | G     | T     | Arm1T                 | NE2   | Chalcolithic             |                  |      |        |
| LG493     | Çamlıbel Tarlası | G     | C     | C     | T     | A     | T        | A     | -        | T     | A     | C     | A     | C     | T     | G     | T     | Arm1T                 | NE2   | Chalcolithic             |                  |      |        |
| LG495     | Çamlıbel Tarlası | G     | C     | C     | T     | A     | T        | A     | -        | T     | A     | C     | A     | C     | T     | G     | T     | Arm1T                 | NE2   | Chalcolithic             |                  |      |        |
| LG522     | Sirkeli Höyük    | G     | C     | C     | T     | A     | T        | A     | -        | T     | A     | C     | A     | C     | T     | G     | T     | Arm1T                 | NE2   | Iron Age                 |                  |      |        |
| LG524     | Sirkeli Höyük    | G     | C     | C     | T     | A     | T        | A     | -        | T     | A     | C     | A     | C     | T     | G     | T     | Arm1T                 | NE2   | Iron Age                 |                  |      |        |
| LG527     | Sirkeli Höyük    | G     | C     | C     | T     | A     | -        | A     | -        | T     | G     | C     | A     | C     | C     | G     | T     | Y1                    | NE2   | Iron Age                 |                  |      |        |
| LG529     | Sirkeli Höyük    | G     | C     | C     | T     | A     | T        | A     | -        | T     | A     | C     | A     | C     | T     | G     | T     | Arm1T                 | NE2   | Iron Age                 |                  |      |        |
| LG773     | Çağa Gavaneh     | G     | C     | C     | T     | A     | T        | A     | -        | T     | A     | C     | A     | C     | T     | G     | T     | Arm1T                 | NE2   | Chalcolithic/Bronze Age  |                  |      |        |
| LG780     | Kohne Tepesi     | G     | C     | C     | T     | A     | T        | A     | -        | T     | A     | C     | A     | C     | T     | G     | T     | Arm1T                 | NE2   | Bronze Age               |                  |      |        |
| LG784     | Haftavan Tepe    | G     | C     | C     | T     | A     | T        | A     | -        | T     | A     | C     | A     | C     | T     | G     | T     | Arm1T                 | NE2   | Middle & Late Bronze Age |                  |      |        |
| LG785     | Haftavan Tepe    | G     | C     | C     | T     | A     | T        | A     | -        | T     | A     | C     | A     | C     | T     | G     | T     | Arm1T                 | NE2   | Middle & Late Bronze Age |                  |      |        |
| LG787     | Haftavan Tepe    | G     | C     | C     | T     | A     | T        | A     | -        | T     | A     | C     | A     | C     | T     | G     | T     | Arm1T                 | NE2   | Middle & Late Bronze Age |                  |      |        |
| LG788     | Haftavan Tepe    | G     | C     | C     | T     | A     | T        | A     | -        | T     | A     | C     | A     | C     | T     | G     | T     | Arm1T                 | NE2   | Middle & Late Bronze Age |                  |      |        |
| LG789     | Haftavan Tepe    | G     | C     | C     | T     | A     | T        | A     | -        | T     | A     | C     | A     | C     | T     | G     | T     | Arm1T                 | NE2   | Middle & Late Bronze Age |                  |      |        |
| LG790     | Haftavan Tepe    | G     | C     | C     | T     | A     | T        | A     | -        | T     | A     | C     | A     | C     | T     | G     | T     | Arm1T                 | NE2   | Middle & Late Bronze Age |                  |      |        |
| LG791     | Haftavan Tepe    | G     | C     | C     | T     | A     | T        | A     | -        | T     | A     | C     | A     | C     | T     | G     | T     | Arm1T                 | NE2   | Middle & Late Bronze Age |                  |      |        |
| LG792     | Haftavan Tepe    | G     | C     | C     | T     | A     | T        | A     | -        | T     | A     | C     | A     | C     | T     | G     | T     | Arm1T                 | NE2   | Middle & Late Bronze Age |                  |      |        |
| LG794     | Haftavan Tepe    | G     | C     | C     | T     | A     | T        | A     | -        | T     | A     | C     | A     | C     | T     | G     | T     | Arm1T                 | NE2   | Middle & Late Bronze Age |                  |      |        |
| LG795     | Haftavan Tepe    | G     | C     | C     | T     | A     | T        | A     | -        | T     | A     | C     | A     | C     | T     | G     | T     | Arm1T                 | NE2   | Middle & Late Bronze Age |                  |      |        |
| LG796     | Haftavan Tepe    | G     | C     | C     | T     | A     | T        | A     | -        | T     | A     | C     | A     | C     | T     | G     | T     | Arm1T                 | NE2   | Middle & Late Bronze Age |                  |      |        |
| LG798     | Haftavan Tepe    | G     | C     | C     | T     | A     | T        | A     | -        | T     | A     | C     | A     | C     | T     | A     | T     | Arm1T                 | NE2   | Middle & Late Bronze Age |                  |      |        |
| Aru7      | Aruchlo          | G     | C     | C     | T     | A     | T        | A     | -        | T     | A     | C     | A     | C     | T     | G     | T     | Arm1T                 | NE2   | Early Neolithic          | domestic         |      |        |
| Aru10     | Aruchlo          | G     | C     | C     | T     | A     | T        | A     | -        | T     | A     | C     | A     | C     | T     | G     | T     | Arm1T                 | NE2   | Early Neolithic          | domestic         |      |        |
| Aru11     | Aruchlo          | G     | C     | C     | T     | A     | T        | A     | -        | T     | A     | C     | A     | C     | T     | G     | T     | Arm1T                 | NE2   | Early Neolithic          | domestic         |      |        |
| Aru12     | Aruchlo          | G     | C     | C     | T     | A     | T        | A     | -        | T     | A     | C     | A     | C     | T     | G     | T     | Arm1T                 | NE2   | Early Neolithic          | domestic         |      |        |
| Aru13     | Aruchlo          | G     | C     | C     | T     | A     | T        | A     | -        | T     | A     | C     | A     | C     | T     | G     | T     | Arm1T                 | NE2   | Early Neolithic          | domestic         |      |        |
| Aru24     | Aruchlo          | G     | C     | C     | T     | A     | T        | A     | -        | T     | A     | C     | A     | C     | T     | G     | T     | Arm1T                 | NE2   | Early Neolithic          | domestic         |      |        |



| ID sample | Site         | ANC1  |       |       |       |       |          |       |          |       |       | ANC2  |       |       |       |       |       |       |       |       |     | Haplotype       | Clade     | Date | Status |
|-----------|--------------|-------|-------|-------|-------|-------|----------|-------|----------|-------|-------|-------|-------|-------|-------|-------|-------|-------|-------|-------|-----|-----------------|-----------|------|--------|
|           |              | 15522 | 15543 | 15546 | 15557 | 15558 | 15567.1T | 15577 | 15577.1A | 15587 | 15592 | 15714 | 15723 | 15724 | 15729 | 15733 | 15741 | 15744 | 15758 |       |     |                 |           |      |        |
| Aru25     | Aruchlo      | G     | C     | C     | T     | A     | T        | A     | -        | T     | A     | C     | A     | C     | A     | C     | T     | G     | T     | Arm1T | NE2 | Early Neolithic | domestic  |      |        |
| Tac6      | Tachti-Perda | G     | C     | C     | T     | A     | T        | A     | -        | T     | A     | C     | A     | C     | A     | C     | T     | G     | T     | Arm1T | NE2 | Late Bronze Age | domestic  |      |        |
| Tac8      | Tachti-Perda | G     | C     | C     | T     | A     | T        | A     | -        | T     | A     | C     | A     | C     | A     | C     | T     | G     | T     | Arm1T | NE2 | Late Bronze Age | domestic  |      |        |
| Tac10     | Tachti-Perda | G     | C     | C     | T     | A     | T        | A     | -        | T     | A     | C     | A     | C     | A     | C     | T     | G     | T     | Arm1T | NE2 | Late Bronze Age | domestic  |      |        |
| Tac13     | Tachti-Perda | G     | C     | C     | T     | A     | T        | A     | -        | T     | A     | C     | A     | C     | A     | C     | T     | G     | T     | Arm1T | NE2 | Late Bronze Age | domestic  |      |        |
| Tac14     | Tachti-Perda | G     | C     | C     | T     | A     | T        | A     | -        | T     | A     | C     | A     | C     | A     | C     | T     | G     | C     | Arm1T | NE2 | Late Bronze Age | domestic  |      |        |
| Tac15     | Tachti-Perda | G     | C     | C     | T     | A     | T        | A     | -        | T     | A     | C     | A     | C     | A     | C     | T     | G     | T     | Arm1T | NE2 | Late Bronze Age | domestic  |      |        |
| Tac16     | Tachti-Perda | G     | C     | C     | T     | A     | T        | A     | -        | T     | A     | C     | A     | C     | A     | C     | T     | G     | T     | Arm1T | NE2 | Late Bronze Age | domestic  |      |        |
| Tac17     | Tachti-Perda | G     | C     | C     | T     | A     | T        | A     | -        | T     | A     | C     | A     | C     | A     | C     | T     | G     | T     | Arm1T | NE2 | Late Bronze Age | domestic  |      |        |
| Mal9      | Malkayası    | G     | C     | C     | T     | A     | -        | A     | -        | T     | G     | C     | A     | C     | G     | C     | C     | G     | T     | Y1    | NE2 | Chalcolithic    | wild      |      |        |
| Mal12     | Malkayası    | G     | C     | C     | T     | A     | -        | A     | -        | T     | G     | C     | A     | C     | G     | C     | C     | G     | T     | Y1    | NE2 | Chalcolithic    | wild      |      |        |
| Men 4     | Menteşe      | G     | C     | C     | T     | A     | -        | A     | -        | T     | G     | C     | A     | C     | A     | C     | C     | G     | T     | Y1    | NE2 | Chalcolithic    | domestic? |      |        |
| Men 5     | Menteşe      | G     | C     | C     | T     | A     | -        | A     | -        | T     | G     | C     | A     | C     | G     | C     | C     | G     | T     | Y1    | NE2 | Chalcolithic    | domestic? |      |        |
| Ulu1      | Ulucak Höyük | G     | C     | C     | T     | A     | -        | A     | -        | T     | G     | C     | A     | C     | G     | C     | C     | G     | T     | Y1    | NE2 | Neolithic       | domestic  |      |        |
| Ulu20     | Ulucak Höyük | G     | C     | C     | T     | A     | -        | A     | -        | T     | G     | C     | A     | C     | A     | C     | C     | G     | T     | Y1    | NE2 | Neolithic       | domestic  |      |        |
| Ulu24     | Ulucak Höyük | G     | C     | C     | T     | A     | -        | A     | -        | T     | G     | C     | A     | C     | A     | C     | C     | G     | T     | Y1    | NE2 | Neolithic       | domestic  |      |        |
| Ulu27     | Ulucak Höyük | G     | C     | C     | T     | A     | -        | A     | -        | T     | G     | C     | A     | C     | A     | C     | C     | G     | T     | Y1    | NE2 | Neolithic       | domestic  |      |        |
| Ulu28     | Ulucak Höyük | G     | C     | C     | T     | A     | -        | A     | -        | T     | G     |       |       |       |       |       |       |       |       | Y1    | NE2 | Neolithic       | domestic  |      |        |
| Ulu48     | Ulucak Höyük | G     | C     | C     | T     | A     | -        | A     | -        | T     | G     | C     | A     | C     | A     | C     | C     | G     | T     | Y1    | NE2 | Neolithic       | domestic  |      |        |
| Ulu49     | Ulucak Höyük | G     | C     | C     | T     | A     | -        | A     | -        | T     | G     | C     | A     | C     | A     | C     | C     | G     | T     | Y1    | NE2 | Neolithic       | domestic  |      |        |

Evin A, Cucchi T, Cardini A, Strand Vidarsdottir U, Larson G, Dobney K. (2013). The long and winding road: Identifying pig domestication through molar size and shape. *J Archaeol Sci* 40 (1): 735-743.

Larson G, et al. (2007) Ancient DNA, pig domestication, and the spread of the Neolithic into Europe. *Proc Natl Acad Sci U S A* 104(39):15276-15281.

Ursing BM, Amason U. (1998) The complete mitochondrial DNA sequence of the pig (*Sus scrofa*). *J Mol Evol* 47:302-306.

**Supplementary table S5.** Ancient pig specimens analyzed in the timeframe 6,500-3,000 BC depicted in supplementary figure S3. An asterisk indicated dates based upon direct AMS dating of pig samples unearthed from the same layer.

| ID sample         | Country | Site             | Phase                                            | Dating                                                     | State        | Anc haplotype | References         |
|-------------------|---------|------------------|--------------------------------------------------|------------------------------------------------------------|--------------|---------------|--------------------|
| Bad4              | Turkey  | Bademağacı       | EN II-4A                                         | 6,390-6,250 BC*                                            | Wild         | Y1            | Present study      |
| Bad5              | Turkey  | Bademağacı       | EN II-4A                                         |                                                            | Wild         | Y1            | Present study      |
| Bad10             | Turkey  | Bademağacı       | EN II-3                                          | 6,450-6,240 BC*                                            | Domestic     | Y1            | Present study      |
| Bad30             | Turkey  | Bademağacı       | EN II-2                                          |                                                            | Domestic     | Y1            | Present study      |
| Bad32             | Turkey  | Bademağacı       | EN II-2                                          |                                                            | Domestic     | Y1            | Present study      |
| Bad47             | Turkey  | Bademağacı       | EN II-3A                                         |                                                            | Domestic     | Y1            | Present study      |
| Bad63             | Turkey  | Bademağacı       | EN II-4B                                         |                                                            | Domestic     | Y1            | Present study      |
| Bad9              | Turkey  | Bademağacı       | EN II-3A                                         |                                                            | Wild         | Arm1T*        | Present study      |
| Bad52             | Turkey  | Bademağacı       | EN II-4A                                         |                                                            | Domestic     | Arm1T*        | Present study      |
| Bad54             | Turkey  | Bademağacı       | EN II-4A                                         |                                                            | Domestic     | Arm1T*        | Present study      |
| Ulu1              | Turkey  | Ulucak Höyük     | Neolithic                                        | 6,400-5,900                                                | Domestic     | Y1            | Present study      |
| Ulu20             | Turkey  | Ulucak Höyük     | Neolithic                                        | 6,400-5,900                                                | Domestic     | Y1            | Present study      |
| Ulu24             | Turkey  | Ulucak Höyük     | Neolithic                                        | 6,400-5,900                                                | Domestic     | Y1            | Present study      |
| Ulu27             | Turkey  | Ulucak Höyük     | Neolithic                                        | 6,400-5,900                                                | Domestic     | Y1            | Present study      |
| Ulu28             | Turkey  | Ulucak Höyük     | Neolithic                                        | 6,400-5,900                                                | Domestic     | Y1            | Present study      |
| Ulu48             | Turkey  | Ulucak Höyük     | Neolithic                                        | 6,400-5,900                                                | Domestic     | Y1            | Present study      |
| Ulu49             | Turkey  | Ulucak Höyük     | Neolithic                                        | 6,400-5,900                                                | Domestic     | Y1            | Present study      |
| Men4              | Turkey  | Menteşe          | Neolithic                                        | ~6.000                                                     | Domestic?    | Y1            | Present study      |
| Men5              | Turkey  | Menteşe          | Neolithic                                        | ~6.000                                                     | Domestic?    | Y1            | Present study      |
| Mal9              | Turkey  | Malkayası        | Chalcolithic                                     | 5,000-4,500                                                | Wild         | Y1            | Present study      |
| Mal12             | Turkey  | Malkayası        | Chalcolithic                                     | 5,000-4,500                                                | Wild         | Y1            | Present study      |
| #31               | Turkey  | Çayönü           | Pottery Neolithic                                | 6,500 BC?                                                  | Domestic     | Arm1T*        | Present study      |
| M120              | Turkey  | Hassek Höyük     | Chalcolithic                                     | mid 4 <sup>th</sup> mill BC                                | Domestic     | Arm1T*        | Present study      |
| M123              | Turkey  | Hassek Höyük     | Chalcolithic                                     | mid 4 <sup>th</sup> mill BC                                | Domestic     | Arm1T*        | Present study      |
| M124              | Turkey  | Hassek Höyük     | Chalcolithic                                     | mid 4 <sup>th</sup> mill BC                                | Domestic     | Y1            | Present study      |
| EDI-CAN 778-5155b | Turkey  | Çamlıbel Tarlası | Chalcolithic                                     | mid 4 <sup>th</sup> mill BC                                | Domestic     | Y1            | Present study      |
| EDI-CAN 891-5779  | Turkey  | Çamlıbel Tarlası | Chalcolithic                                     | mid 4 <sup>th</sup> mill BC                                | Domestic?    | Y1            | Present study      |
| EDI-CAN 247-372b  | Turkey  | Çamlıbel Tarlası | Chalcolithic                                     | mid 4 <sup>th</sup> mill BC                                | Domestic     | Y1            | Present study      |
| EDI-CAN 463-4067  | Turkey  | Çamlıbel Tarlası | Chalcolithic                                     | mid 4 <sup>th</sup> mill BC                                | Domestic?    | Y1            | Present study      |
| EDI-CAN 746-4982  | Turkey  | Çamlıbel Tarlası | Chalcolithic                                     | mid 4 <sup>th</sup> mill BC                                | Domestic     | Y1            | Present study      |
| EDI-CAN 250-397b  | Turkey  | Çamlıbel Tarlası | Chalcolithic                                     | mid 4 <sup>th</sup> mill BC                                | Domestic     | Arm1T*        | Present study      |
| EDI-CAN 273-868   | Turkey  | Çamlıbel Tarlası | Chalcolithic                                     | mid 4 <sup>th</sup> mill BC                                | Domestic     | Arm1T*        | Present study      |
| EDI-CAN 966-6042  | Turkey  | Çamlıbel Tarlası | Chalcolithic                                     | mid 4 <sup>th</sup> mill BC                                | Domestic     | Arm1T*        | Present study      |
| EDI-CAN 796-5229  | Turkey  | Çamlıbel Tarlası | Chalcolithic                                     | mid 4 <sup>th</sup> mill BC                                | Domestic     | Arm1T*        | Present study      |
| EDI-CAN 56-252c   | Turkey  | Çamlıbel Tarlası | Chalcolithic                                     | mid 4 <sup>th</sup> mill BC                                | Domestic     | Arm1T*        | Present study      |
| EDI-CAN 352-987   | Turkey  | Çamlıbel Tarlası | Chalcolithic                                     | mid 4 <sup>th</sup> mill BC                                | Domestic     | Arm1T*        | Present study      |
| EDI-CAN 925-5377  | Turkey  | Çamlıbel Tarlası | Chalcolithic                                     | mid 4 <sup>th</sup> mill BC                                | Domestic     | Arm1T*        | Present study      |
| EDI-CAN 858-5569  | Turkey  | Çamlıbel Tarlası | Chalcolithic                                     | mid 4 <sup>th</sup> mill BC                                | Domestic     | Arm1T*        | Present study      |
| GL343             | Armenia | Khatunarkh       | 5 <sup>th</sup> mill                             | 5 <sup>th</sup> mill BC uncal ?                            | Wild         | Arm2T*        | Larson et al. 2007 |
| GL376             | Armenia | Shengevit        | Late 4 <sup>th</sup> -early 3 <sup>rd</sup> mill | late 4 <sup>th</sup> -early 3 <sup>rd</sup> mill BC uncal? | undetermined | Arm2T*        | Larson et al. 2007 |
| ARU7              | Georgia | Aruchlo          | Early Neolithic                                  | 5,600-5,300                                                | domestic     | Arm1T*        | Present study      |
| ARU10             | Georgia | Aruchlo          | Early Neolithic                                  | 5,600-5,300                                                | domestic     | Arm1T*        | Present study      |
| ARU11             | Georgia | Aruchlo          | Early Neolithic                                  | 5,600-5,300                                                | domestic     | Arm1T*        | Present study      |
| ARU12             | Georgia | Aruchlo          | Early Neolithic                                  | 5,600-5,300                                                | domestic     | Arm1T*        | Present study      |
| ARU13             | Georgia | Aruchlo          | Early Neolithic                                  | 5,600-5,300                                                | domestic     | Arm1T*        | Present study      |

| ID sample | Country | Site                    | Phase             | Dating                                           | State        | Anc haplotype | References         |
|-----------|---------|-------------------------|-------------------|--------------------------------------------------|--------------|---------------|--------------------|
| ARU24     | Georgia | Aruchlo                 | Early Neolithic   | 5,600-5,300                                      | domestic     | Arm1T*        | Present study      |
| ARU25     | Georgia | Aruchlo                 | Early Neolithic   | 5,600-5,300                                      | domestic     | Arm1T*        | Present study      |
| LG017     | Iran    | Qaleh Rostam            | Neolithic         | 7th millennium BC?                               |              | Arm1T*        | Present study      |
| LG414     | Iran    | Mehr Ali                | Late Chalcolithic | 4th millennium BC                                |              | Arm1T*        | Present study      |
| GL728     | Croatia | Pupicinia cave          | Late Neolithic    | 4,300 BC                                         | Domestic?    | Y2-5A         | Larson et al. 2007 |
| GL123     | Germany | Eilsleben               | LBK               | 5,500-5,000 BC                                   | Wild         | Cside         | Larson et al. 2007 |
| GL541     | Germany | Eilsleben               | LBK               | 5,500-5,000 BC                                   | Undetermined | Cside         | Larson et al. 2007 |
| GL977     | Germany | Eilsleben               | LBK               | 5,500-5,000 BC                                   | Domestic?    | Y1-6A         | Larson et al. 2007 |
| GL972     | Germany | Eilsleben               | LBK               | 5,500-5,000 BC                                   | Domestic?    | Y1-6A         | Larson et al. 2007 |
| GL973     | Germany | Eilsleben               | LBK               | 5,500-5,000 BC                                   | Domestic?    | Y1-6A         | Larson et al. 2007 |
| GL976     | Germany | Eilsleben               | LBK               | 5,500-5,000 BC                                   | Domestic?    | Y1-6A         | Larson et al. 2007 |
| GL882     | Italy   | Grotta Madonna          | Mesolithic        | 6,500-5,500 BC                                   | Undetermined | Italy         | Larson et al. 2007 |
| GL848     | Italy   | Grotta Madonna          | Mid Neolithic     | 5,500-4,500 BC                                   | Undetermined | Italy         | Larson et al. 2007 |
| GL900     | Romania | Măgura                  | Neolithic         | 5,500 BC                                         | Domestic     | Y1-6A         | Larson et al. 2007 |
| GL903     | Romania | Măgura                  | Neolithic         | 5,500 BC                                         | Domestic     | Y1-6A         | Larson et al. 2007 |
| GL375     | Romania | Veterani cave           | Neolithic         | 5,300-5,000 BC                                   |              | Aside         | Larson et al. 2007 |
| GL521     | Romania | Bordusani               | Chalcolithic      | 4,500-3,950 BC                                   | Domestic     | Y1-6A         | Larson et al. 2007 |
| GL522     | Romania | Poduri                  | Chalcolithic      | 4,500-4,250 BC                                   | Domestic     | Y1-6A         | Larson et al. 2007 |
| GL523     | Romania | Poduri                  | Chalcolithic      | 4,500-4,250 BC                                   | Domestic     | Y1-6A         | Larson et al. 2007 |
| GL688     | Romania | Poduri                  | Chalcolithic      | 4,500-4,250 BC                                   | Wild         | Cside         | Larson et al. 2007 |
| GL566     | Romania | Căscioarele             | Chalcolithic      | mid 5 <sup>th</sup> -mid 4 <sup>th</sup> mill BC | Wild         | Cside         | Larson et al. 2007 |
| GL567     | Romania | Căscioarele             | Chalcolithic      | mid 5 <sup>th</sup> -mid 4 <sup>th</sup> mill BC | Wild         | Cside         | Larson et al. 2007 |
| GL432     | Romania | Căscioarele             | Chalcolithic      | mid 5 <sup>th</sup> -mid 4 <sup>th</sup> mill BC | Domestic     | Y1-6A         | Larson et al. 2007 |
| GL568     | Romania | Căscioarele             | Chalcolithic      | mid 5 <sup>th</sup> -mid 4 <sup>th</sup> mill BC | Domestic     | Y1-6A         | Larson et al. 2007 |
| GL576     | Romania | Căscioarele             | Chalcolithic      | mid 5 <sup>th</sup> -mid 4 <sup>th</sup> mill BC | Domestic     | Y1-6A         | Larson et al. 2007 |
| GL868     | Romania | Căscioarele             | Chalcolithic      | mid 5 <sup>th</sup> -mid 4 <sup>th</sup> mill BC | Domestic     | Y1-6A         | Larson et al. 2007 |
| GL575     | Romania | Căscioarele             | Chalcolithic      | mid 5 <sup>th</sup> -mid 4 <sup>th</sup> mill BC | Wild         | Cside         | Larson et al. 2007 |
| GL803     | Romania | Căscioarele             | Chalcolithic      | mid 5 <sup>th</sup> -mid 4 <sup>th</sup> mill BC | Domestic     | Y1-6A         | Larson et al. 2007 |
| GL834     | Romania | Căscioarele             | Chalcolithic      | mid 5 <sup>th</sup> -mid 4 <sup>th</sup> mill BC | Domestic     | Y1-6A         | Larson et al. 2007 |
| GL987     | Romania | Căscioarele             | Chalcolithic      | mid 5 <sup>th</sup> -mid 4 <sup>th</sup> mill BC | undetermined | Y1-6A         | Larson et al. 2007 |
| GL447     | Romania | Căscioarele             | Chalcolithic      | mid 5 <sup>th</sup> -mid 4 <sup>th</sup> mill BC | undetermined | Cside         | Larson et al. 2007 |
| GL565     | Romania | Căscioarele             | Chalcolithic      | mid 5 <sup>th</sup> -mid 4 <sup>th</sup> mill BC | undetermined | Y1-6A         | Larson et al. 2007 |
| GL429     | Denmark | Flynderhage             | Late Mesolithic   | 4,500-3,900 BC                                   | Wild         | Cside         | Larson et al. 2007 |
| GL907     | Denmark | Flynderhage             | Late Mesolithic   | 4,500-3,900 BC                                   | Wild         | Cside         | Larson et al. 2007 |
| A212      | England | Carsington Pasture cave | Mesolithic        | 4,393 ± 41 BC                                    | Wild         | Cside         | Larson et al. 2007 |
| A213      | England | Carsington Pasture cave | Mesolithic        | 5,678 ± 30 BC                                    | Wild         | Aside         | Larson et al. 2007 |
| A216      | England | Carsington Pasture cave | Mesolithic        | 3,457 ± 58 BC                                    | Domestic     | Aside         | Larson et al. 2007 |
| GL846     | France  | Bercy                   | Chaseen culture   | early 4 <sup>th</sup> mill BC                    | Domestic     | Y1-6A         | Larson et al. 2007 |
| GL859     | France  | Bercy                   | Chaseen culture   | early 4 <sup>th</sup> mill BC                    | Domestic?    | Aside         | Larson et al. 2007 |
| GL571     | France  | Bercy                   | Chaseen culture   | early 4 <sup>th</sup> mill BC                    | Domestic     | Aside         | Larson et al. 2007 |
| GL572     | France  | Bercy                   | Chaseen culture   | early 4 <sup>th</sup> mill BC                    | Domestic     | Aside         | Larson et al. 2007 |
| GL824     | France  | Bercy                   | Chaseen culture   | early 4 <sup>th</sup> mill BC                    | Domestic     | Aside         | Larson et al. 2007 |
| GL573     | France  | Bercy                   | Chaseen culture   | early 4 <sup>th</sup> mill BC                    | Domestic     | Aside         | Larson et al. 2007 |
| GL874     | France  | Bercy                   | Chaseen culture   | early 4 <sup>th</sup> mill BC                    | Domestic     | Aside         | Larson et al. 2007 |
| GL574     | France  | Bercy                   | Chaseen culture   | early 4 <sup>th</sup> mill BC                    | Wild         | Cside         | Larson et al. 2007 |
| GL355     | France  | Bercy                   | Chaseen culture   | early 4 <sup>th</sup> mill BC                    | Domestic     | Y1-6A         | Larson et al. 2007 |

| <b>ID sample</b> | <b>Country</b> | <b>Site</b>     | <b>Phase</b>        | <b>Dating</b>       | <b>State</b> | <b>Anc haplotype</b> | <b>References</b>  |
|------------------|----------------|-----------------|---------------------|---------------------|--------------|----------------------|--------------------|
| GL321            | France         | Roucadour       | Mid Neolithic       | 4,200-3,500 BC cal? | Wild         | Aside                | Larson et al. 2007 |
| GL470            | France         | Roucadour       | Mid Neolithic       | 4,200-3,500 BC cal? | Wild         | Aside                | Larson et al. 2007 |
| GL485            | France         | Roucadour       | Mid Neolithic       | 4,200-3,500 BC cal? | Wild         | Aside                | Larson et al. 2007 |
| GL490            | France         | B. Oulens       | Neolithic (cardial) | 5,306-4,962 BC      | Wild         | Cside                | Larson et al. 2007 |
| GL491            | France         | B. Oulens       | Neolithic (cardial) | 5,471-5,222 BC      | Domestic?    | Aside                | Larson et al. 2007 |
| A244             | Ireland        | Moynagh Crannog |                     | 3,866 ± 60          | undetermined | Aside                | Larson et al. 2007 |

Larson G, et al. (2007) Ancient DNA, pig domestication, and the spread of the Neolithic into Europe. *Proc Natl Acad Sci U S A* 104(39):15276-15281.

**Supplementary table S6.** Differences between pigs with Near Eastern and European lineages in size (Kruskall-Wallis test) and shape (MANOVA) based on geometric and traditional morphometrics. Significant results are in bold for lower M2 and M3 with sample size in parentheses (EU: European lineages, NE: Near East lineages).

|                         |                | Lower M2 (EU=8 ; NE=17) |             |             |          |           |              |              | Lower M3 (EU=17 ; NE=20) |                |             |          |           |              |            |               |            |
|-------------------------|----------------|-------------------------|-------------|-------------|----------|-----------|--------------|--------------|--------------------------|----------------|-------------|----------|-----------|--------------|------------|---------------|------------|
|                         |                | X <sup>2</sup>          | Df          | Pillai      | approxF  | numDf     | denDf        | p            | CVP                      | X <sup>2</sup> | Df          | Pillai   | approxF   | numDf        | denDf      | p             | CVP        |
| Geometric morphometrics | Shape          | <b>1</b>                | <b>0.53</b> | <b>3.34</b> | <b>6</b> | <b>18</b> | <b>0.021</b> | <b>80%</b>   | <b>1</b>                 | <b>0.51</b>    | <b>3.11</b> | <b>9</b> | <b>27</b> | <b>0.011</b> | <b>76%</b> |               |            |
|                         | Centroid Size  | <b>6.87</b>             | <b>1</b>    |             |          |           |              | <b>0.009</b> | <b>80%</b>               | <b>14.75</b>   | <b>1</b>    |          |           |              |            | <b>0.0001</b> | <b>76%</b> |
| Traditional metrics     | Shape          | 1                       | 0.29        | 2.91        | 3        | 21        | 0.06         |              | 1                        | 0.15           | 1.46        | 4        | 32        | 0.24         |            |               |            |
|                         | Isometric Size | <b>8.83</b>             | <b>1</b>    |             |          |           |              | <b>0.003</b> | <b>80%</b>               | <b>13.37</b>   | <b>1</b>    |          |           |              |            | <b>0.0003</b> | <b>78%</b> |
