# Supplementary figures and images for: Pig Domestication and Human-Mediated Dispersal in Western Eurasia Revealed through Ancient DNA and Geometric Morphometrics
Source: PubMed Central journal article supplement — Mol Biol Evol. 2012 Nov 22;30(4):824–32. doi: 10.1093/molbev/mss261 (PMC3603306; doi:10.1093/molbev/mss261), 2012-11-22

a)

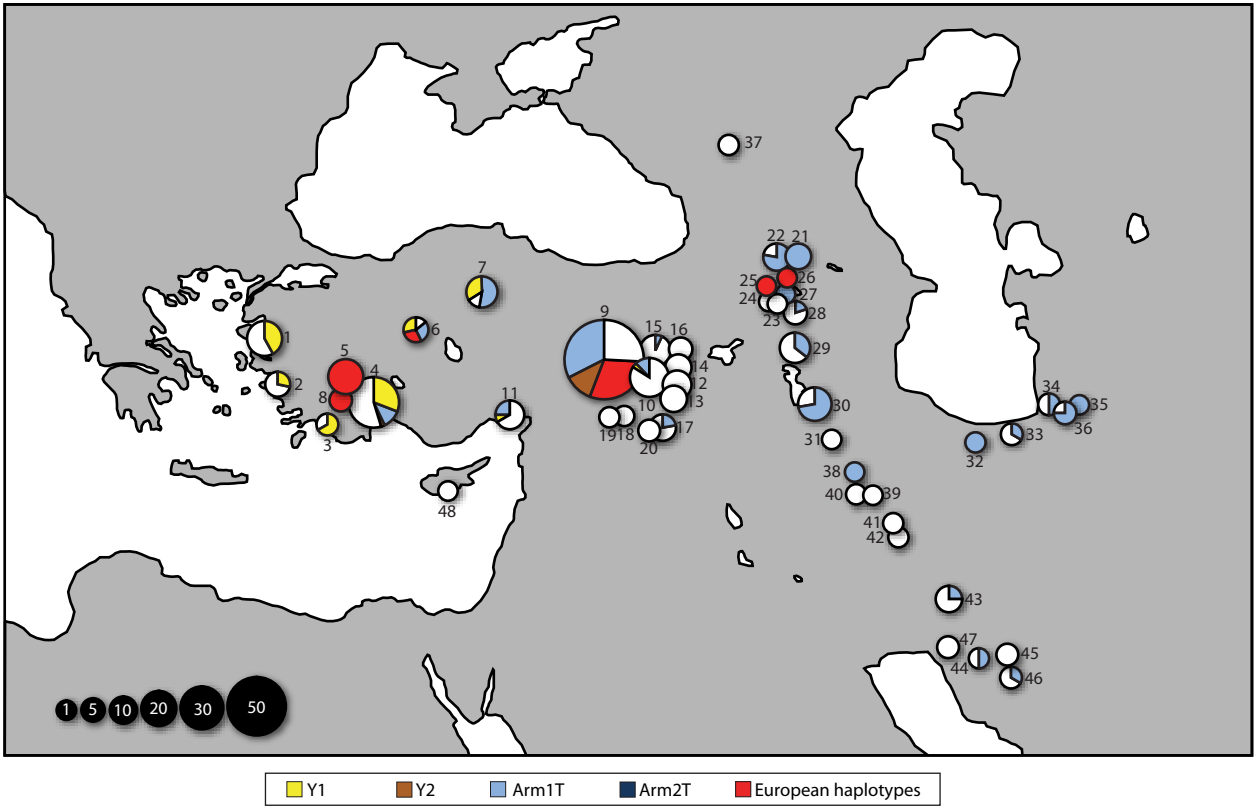

b)

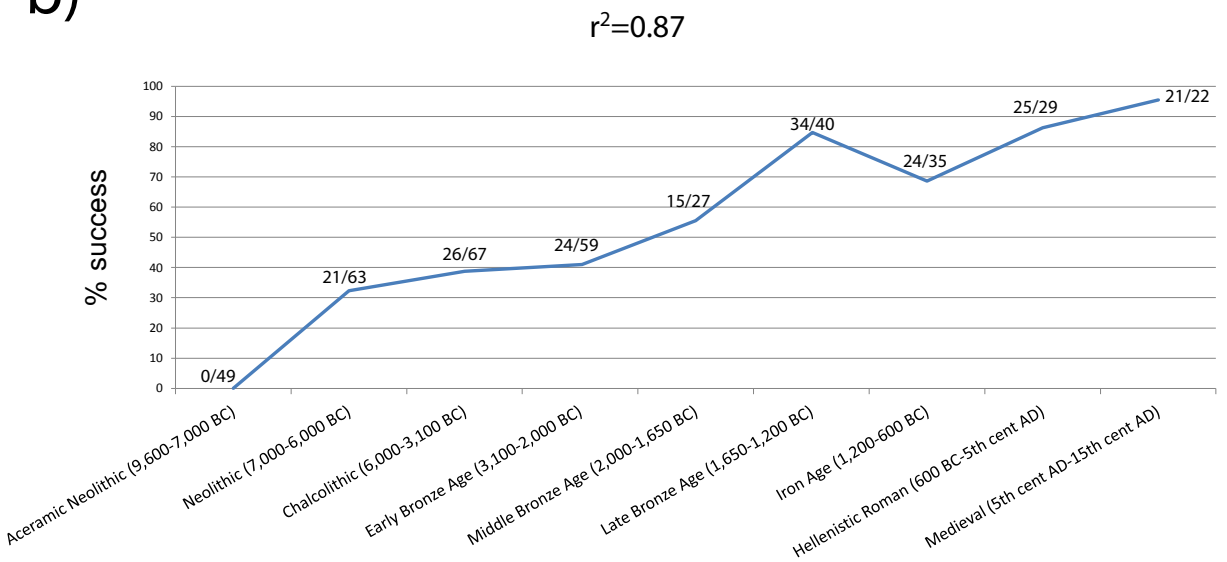

Supplement: supp_mss261_Fig_S1_rev_proof.pdf [file supp_mss261_Fig_S1_rev_proof.pdf]

a)

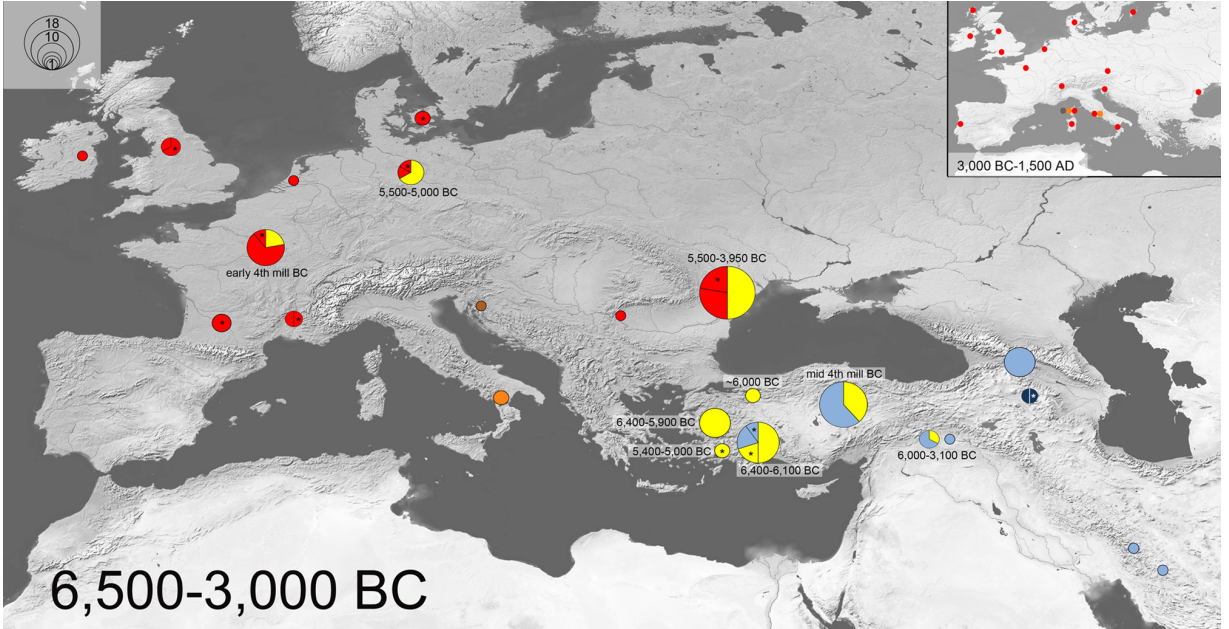

b)

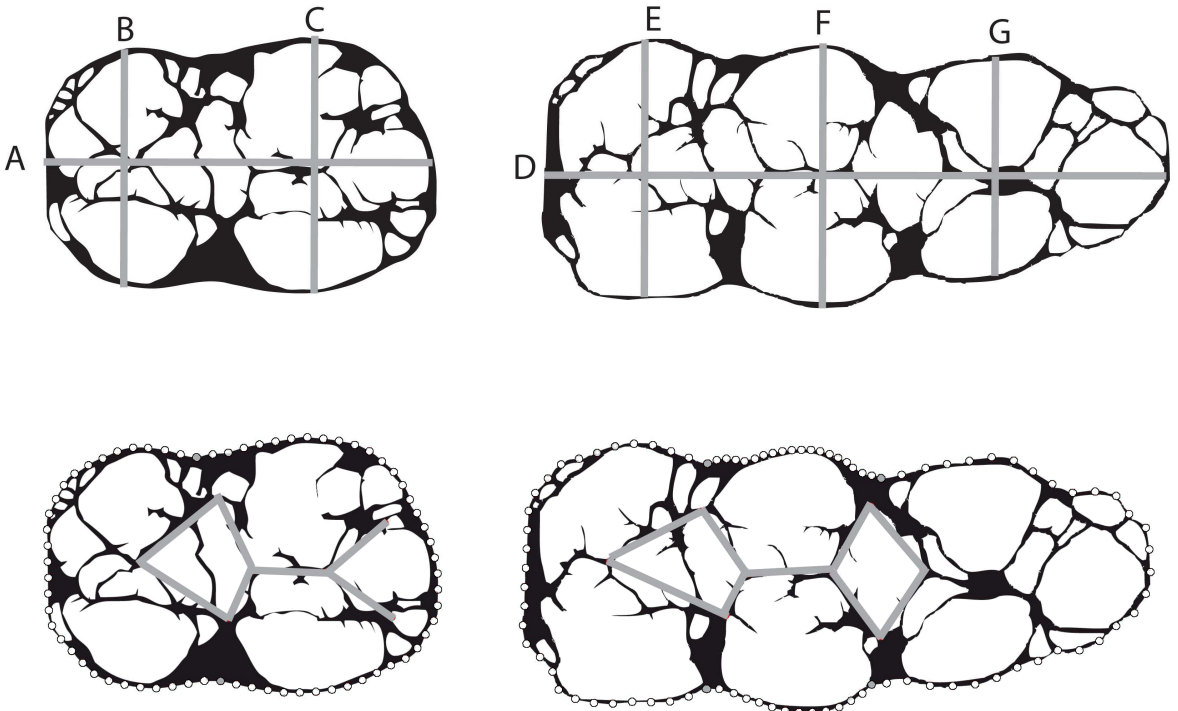

Supplement: supp_mss261_Fig_S3.pdf [file supp_mss261_Fig_S3.pdf]
